# Supplementary material for: A Study to Decipher the Potential Effects of Butylphthalide against Central Nervous System Diseases Based on Network Pharmacology and Molecular Docking Integration Strategy
Source: Hindawi journal article supplement (doi:10.1155/2021/6694698), 2021-05-04
Supplement: f1 [file 6694698.f1.pdf]

Additional file1 The 175 NBP genes

| target genes | sources                  |
|--------------|--------------------------|
| ALB          | PharmMapper and DRAR-CPI |
| ATIC         | PharmMapper and DRAR-CPI |
| BCHE         | PharmMapper and DRAR-CPI |
| BMP7         | PharmMapper and DRAR-CPI |
| CD1A         | PharmMapper and DRAR-CPI |
| CSF2RB       | PharmMapper and DRAR-CPI |
| ESR1         | PharmMapper and DRAR-CPI |
| FABP7        | PharmMapper and DRAR-CPI |
| GC           | PharmMapper and DRAR-CPI |
| GSTT2B       | PharmMapper and DRAR-CPI |
| HDAC7        | PharmMapper and DRAR-CPI |
| IGF1R        | PharmMapper and DRAR-CPI |
| NR1I3        | PharmMapper and DRAR-CPI |
| ODC1         | PharmMapper and DRAR-CPI |
| SULT1E1      | PharmMapper and DRAR-CPI |
| CASP3        | PubMed                   |
| VEGFA        | PubMed                   |
| AKT1         | PubMed                   |
| SOD1         | PubMed                   |
| BCL2         | PubMed                   |
| RELA         | PubMed                   |
| TNF          | PubMed                   |
| HMOX1        | PubMed                   |
| GFAP         | PubMed                   |
| NFE2L2       | PubMed                   |
| IL1B         | PubMed                   |
| MAPK1        | PubMed                   |
| BAX          | PubMed                   |
| BDNF         | PubMed                   |
| DLG4         | PubMed                   |
| CAT          | PubMed                   |
| CLDN5        | PubMed                   |
| GSK3B        | PubMed                   |
| IL6          | PubMed                   |
| MAPK14       | PubMed                   |
| MAPK3        | PubMed                   |
| MAPK8        | PubMed                   |
| SYP          | PubMed                   |
| CTNNB1       | PubMed                   |
| FGF2         | PubMed                   |
| HIF1A        | PubMed                   |
| HSPA5        | PubMed                   |
| PIK3CA       | PubMed                   |
| ATF6         | PubMed                   |
| CASP12       | PubMed                   |
| CASP9        | PubMed                   |
| CHAT         | PubMed                   |
| CREB1        | PubMed                   |
| DDIT3        | PubMed                   |
| EDN1         | PubMed                   |

remove duplicated genes  
(175 genes left)

|        |
|--------|
| ACE    |
| ACHE   |
| ADRA1A |
| ADRA2A |
| ADRB1  |
| ADRB2  |
| AGER   |
| AGT    |
| AGTR1  |
| AKT1   |
| ALB    |
| ANGPT1 |
| ANGPT2 |
| APP    |
| ARG1   |
| ASCL1  |
| ATF4   |
| ATF6   |
| ATIC   |
| BACE1  |
| BAX    |
| BCHE   |
| BCL2   |
| BCL2L2 |
| BDNF   |
| BECN1  |
| BMP7   |
| BNIP3  |
| CAMK2G |
| CAPN1  |
| CASP12 |
| CASP3  |
| CASP9  |
| CAT    |
| CCL2   |
| CCND1  |
| CD1A   |
| CD34   |
| CDH2   |
| CDK5   |
| CHAT   |
| CHRM1  |
| CLDN5  |
| CREB1  |
| CSF2RB |
| CTNNB1 |
| CTNND1 |
| CYCS   |
| DDIT3  |
| DLG4   |

|          |        |
|----------|--------|
| MAP1LC3A | PubMed |
| MAPT     | PubMed |
| NFKBIA   | PubMed |
| NGF      | PubMed |
| NQO1     | PubMed |
| PRKCA    | PubMed |
| TGFB1    | PubMed |
| TJP1     | PubMed |
| XPB1     | PubMed |
| ANGPT1   | PubMed |
| APP      | PubMed |
| ATF4     | PubMed |
| BECN1    | PubMed |
| CAMK2G   | PubMed |
| CAPN1    | PubMed |
| GAP43    | PubMed |
| GJA1     | PubMed |
| GPX1     | PubMed |
| GRIN2B   | PubMed |
| ICAM1    | PubMed |
| ITGAM    | PubMed |
| MMP9     | PubMed |
| MTOR     | PubMed |
| NOS3     | PubMed |
| PDIA6    | PubMed |
| RHOA     | PubMed |
| RTN4     | PubMed |
| SHH      | PubMed |
| SNCA     | PubMed |
| TLR4     | PubMed |
| TXN      | PubMed |
| ACE      | PubMed |
| ACHE     | PubMed |
| AGER     | PubMed |
| AGT      | PubMed |
| AGTR1    | PubMed |
| ANGPT2   | PubMed |
| ARG1     | PubMed |
| ASCL1    | PubMed |
| BACE1    | PubMed |
| BCL2L2   | PubMed |
| BNIP3    | PubMed |
| CCL2     | PubMed |
| CCND1    | PubMed |
| CD34     | PubMed |
| CDH2     | PubMed |
| CDK5     | PubMed |
| CTNND1   | PubMed |
| CYCS     | PubMed |
| DNM1L    | PubMed |
| DUSP2    | PubMed |
| ECE1     | PubMed |
| EGF      | PubMed |
| EIF2AK3  | PubMed |

|          |
|----------|
| DNM1L    |
| DRD2     |
| DUSP2    |
| ECE1     |
| EDN1     |
| EGF      |
| EIF2AK3  |
| EIF2S1   |
| ELK1     |
| ERN1     |
| ESR1     |
| FABP7    |
| FASLG    |
| FGF2     |
| FGFR2    |
| FIS1     |
| FOS      |
| FOXP3    |
| GAD1     |
| GAD2     |
| GAP43    |
| GAPDH    |
| GC       |
| GFAP     |
| GJA1     |
| GLI1     |
| GPX1     |
| GRIN1    |
| GRIN2B   |
| GSK3B    |
| GSR      |
| GSS      |
| GSTT2B   |
| HDAC7    |
| HGF      |
| HIF1A    |
| HMOX1    |
| HSPA4    |
| HSPA5    |
| ICAM1    |
| IFNG     |
| IGF1R    |
| IL10     |
| IL1B     |
| IL6      |
| ITGAM    |
| JUN      |
| KDR      |
| KEAP1    |
| MAOA     |
| MAOB     |
| MAP1LC3A |
| MAPK1    |
| MAPK14   |

|          |        |
|----------|--------|
| EIF2S1   | PubMed |
| ELK1     | PubMed |
| ERN1     | PubMed |
| FASLG    | PubMed |
| FGFR2    | PubMed |
| FIS1     | PubMed |
| FOS      | PubMed |
| FOXP3    | PubMed |
| GAD1     | PubMed |
| GAD2     | PubMed |
| GAPDH    | PubMed |
| GLI1     | PubMed |
| GRIN1    | PubMed |
| GSR      | PubMed |
| GSS      | PubMed |
| HGF      | PubMed |
| HSPA4    | PubMed |
| IFNG     | PubMed |
| IL10     | PubMed |
| JUN      | PubMed |
| KDR      | PubMed |
| KEAP1    | PubMed |
| MFN1     | PubMed |
| MFN2     | PubMed |
| MMP2     | PubMed |
| NCF2     | PubMed |
| NOS2     | PubMed |
| NOX2     | PubMed |
| NTRK2    | PubMed |
| OCLN     | PubMed |
| OPA1     | PubMed |
| PDE2A    | PubMed |
| PGAM5    | PubMed |
| PLA2G4A  | PubMed |
| PPARGC1A | PubMed |
| PRKAA1   | PubMed |
| PRKCE    | PubMed |
| PRKCG    | PubMed |
| PTCH1    | PubMed |
| PTGES    | PubMed |
| PTGIS    | PubMed |
| PTGS2    | PubMed |
| REN      | PubMed |
| RORA     | PubMed |
| RTN4R    | PubMed |
| S100B    | PubMed |
| SIRT1    | PubMed |
| SLC17A7  | PubMed |
| SLC18A2  | PubMed |
| SMO      | PubMed |
| SOD2     | PubMed |
| TBXAS1   | PubMed |
| TEK      | PubMed |
| TNFSF10  | PubMed |

|          |
|----------|
| MAPK3    |
| MAPK8    |
| MAPT     |
| MFN1     |
| MFN2     |
| MMP2     |
| MMP9     |
| MTOR     |
| NCF2     |
| NFE2L2   |
| NFKBIA   |
| NGF      |
| NOS2     |
| NOS3     |
| NOX2     |
| NQO1     |
| NR1I3    |
| NTRK2    |
| OCLN     |
| ODC1     |
| OPA1     |
| PDE2A    |
| PDIA6    |
| PGAM5    |
| PIK3CA   |
| PLA2G4A  |
| PPARGC1A |
| PRKAA1   |
| PRKCA    |
| PRKCE    |
| PRKCG    |
| PTCH1    |
| PTGES    |
| PTGIS    |
| PTGS1    |
| PTGS2    |
| RELA     |
| REN      |
| RHOA     |
| RORA     |
| RTN4     |
| RTN4R    |
| RXRA     |
| S100B    |
| SCN5A    |
| SHH      |
| SIRT1    |
| SLC17A7  |
| SLC18A2  |
| SLC6A2   |
| SLC6A3   |
| SLC6A4   |
| SMO      |
| SNCA     |

|        |        |
|--------|--------|
| TP53   | PubMed |
| TUBB3  | PubMed |
| TXNIP  | PubMed |
| ADRA1A | SymMap |
| ADRA2A | SymMap |
| ADRB1  | SymMap |
| ADRB2  | SymMap |
| CHRM1  | SymMap |
| DRD2   | SymMap |
| FGF2   | SymMap |
| MAOA   | SymMap |
| MAOB   | SymMap |
| PTGS1  | SymMap |
| PTGS2  | SymMap |
| RXRA   | SymMap |
| SCN5A  | SymMap |
| SLC6A2 | SymMap |
| SLC6A3 | SymMap |
| SLC6A4 | SymMap |
| VEGFA  | SymMap |

|         |
|---------|
| SOD1    |
| SOD2    |
| SULT1E1 |
| SYP     |
| TBXAS1  |
| TEK     |
| TGFB1   |
| TJP1    |
| TLR4    |
| TNF     |
| TNFSF10 |
| TP53    |
| TUBB3   |
| TXN     |
| TXNIP   |
| VEGFA   |
| XBP1    |

Additional file2 312 IS-related genes (Malacards\_DisGeNET\_OMIM)

| Symbol     | source    | 312 Symbols (duplicated genes removal) | count |
|------------|-----------|----------------------------------------|-------|
| F2         | Malacards | ALOX5AP                                | 3     |
| F5         | Malacards | F2                                     | 3     |
| PRKCH      | Malacards | F5                                     | 3     |
| ALOX5AP    | Malacards | NOS3                                   | 3     |
| NOS3       | Malacards | PDE4D                                  | 3     |
| NOTCH3     | Malacards | PRKCH                                  | 3     |
| LDLR       | Malacards | ACE                                    | 2     |
| ACSL4      | Malacards | ADORA1                                 | 2     |
| FBN1       | Malacards | APOA1                                  | 2     |
| MT-TL1     | Malacards | APOE                                   | 2     |
| PIK3CA     | Malacards | BAD                                    | 2     |
| CDKN2B-AS1 | Malacards | BDNF                                   | 2     |
| MALAT1     | Malacards | CASP3                                  | 2     |
| MIAT       | Malacards | CCL2                                   | 2     |
| ACE        | Malacards | CD163                                  | 2     |
| PLAT       | Malacards | CREB1                                  | 2     |
| PDE4D      | Malacards | CYCS                                   | 2     |
| PTGIS      | Malacards | EDN1                                   | 2     |
| APOH       | Malacards | FGA                                    | 2     |
| MTHFR      | Malacards | FOS                                    | 2     |
| SERPINC1   | Malacards | HBA1                                   | 2     |
| KCNB1      | Malacards | IL1B                                   | 2     |
| SERPINE1   | Malacards | ITGA2B                                 | 2     |
| ODC1       | Malacards | LPA                                    | 2     |
| SELP       | Malacards | MMP9                                   | 2     |
| F3         | Malacards | MTHFR                                  | 2     |
| KMO        | Malacards | NOS2                                   | 2     |
| HSPA1A     | Malacards | NOTCH3                                 | 2     |
| KYNU       | Malacards | PARP1                                  | 2     |
| VWF        | Malacards | PLA2G7                                 | 2     |
| THBD       | Malacards | PLAT                                   | 2     |
| SULT1A3    | Malacards | S100B                                  | 2     |
| CRP        | Malacards | SELE                                   | 2     |
| ADORA1     | Malacards | SERPINC1                               | 2     |
| GRIN2A     | Malacards | SERPINE1                               | 2     |
| APOE       | Malacards | TNF                                    | 2     |
| CASP3      | Malacards | VWF                                    | 2     |
| S100B      | Malacards | ABCC11                                 | 1     |
| SLC1A1     | Malacards | ABO                                    | 1     |
| ADCY10     | Malacards | ACRDYS2                                | 1     |
| BAD        | Malacards | ACSL4                                  | 1     |
| PTK2B      | Malacards | ADAMTS1                                | 1     |
| MAP2       | Malacards | ADAMTS13                               | 1     |
| ENO2       | Malacards | ADAMTS18                               | 1     |
| IL1B       | Malacards | ADCY10                                 | 1     |
| NCAM1      | Malacards | ADD3                                   | 1     |
| DRD1       | Malacards | ADH1B                                  | 1     |
| GCKR       | Malacards | ADM                                    | 1     |
| KRT18      | Malacards | AGER                                   | 1     |
| HSPA8      | Malacards | AGT                                    | 1     |













|         |          |
|---------|----------|
| S100A5  | DisGeNet |
| CCL7    | DisGeNet |
| TNFAIP6 | DisGeNet |
| XDH     | DisGeNet |
| FGF21   | DisGeNet |
| IL22    | DisGeNet |
| SPHK2   | DisGeNet |
| GSTP1   | DisGeNet |
| HMOX1   | DisGeNet |
| AGT     | DisGeNet |
| FASLG   | DisGeNet |
| PODXL   | DisGeNet |
| CD163   | DisGeNet |
| MRAS    | DisGeNet |
| VCAM1   | DisGeNet |
| NOTCH3  | OMIM     |
| CADASIL | OMIM     |
| CASIL   | OMIM     |
| IMF2    | OMIM     |
| PRKCH   | OMIM     |
| PKCL    | OMIM     |
| PRKCL   | OMIM     |
| NOS3    | OMIM     |
| F2      | OMIM     |
| THPH1   | OMIM     |
| RPRGL2  | OMIM     |
| F5      | OMIM     |
| THPH2   | OMIM     |
| RPRGL1  | OMIM     |
| PDE4D   | OMIM     |
| DPDE3   | OMIM     |
| STRK1   | OMIM     |
| ACRDYS2 | OMIM     |
| ALOX5AP | OMIM     |
| FLAP    | OMIM     |

| Additional file3 Genes of Ischemic stroke, C0948008 |          |              |          |         |                               |             |       |       |            |
|-----------------------------------------------------|----------|--------------|----------|---------|-------------------------------|-------------|-------|-------|------------|
| Index_disease                                       | Index_id | Gene         | Gene_id  | UniProt | Gene_Full                     | Protein_pLI | DSI_g | DPI_g | diseaseid1 |
| Ischemic stroke                                     | C0948008 | XYLB         | 9942     | 075191  | xlulokin; transfera           |             | 1     | 0.069 | C0948008   |
| Ischemic stroke                                     | C0948008 | ROPN1        | 54763    | Q9HAT0  | rhophilin associated tail     |             | 1     | 0.069 | C0948008   |
| Ischemic stroke                                     | C0948008 | METTL18      | 92342    | 095568  | methyltransferase like 18     |             | 1     | 0.069 | C0948008   |
| Ischemic stroke                                     | C0948008 | ACOT4        | 122970   | Q8N9L9  | acyl-CoA thioesterase 4       |             | 1     | 0.069 | C0948008   |
| Ischemic stroke                                     | C0948008 | TTC7B        | 145567   | Q86TV6  | tetratricopeptide repeat c    |             | 1     | 0.069 | C0948008   |
| Ischemic stroke                                     | C0948008 | NDUFC2       | 4718     | 095298  | NADH:ubiquinol oxidoreductase |             | 0.928 | 0.138 | C0948008   |
| Ischemic stroke                                     | C0948008 | PDE4DIP      | 9659     | Q5VU43  | phosphodiesterase 4D inter    |             | 0.928 | 0.103 | C0948008   |
| Ischemic stroke                                     | C0948008 | KCNK17       | 89822    | Q96T54  | potassium two pore domain     |             | 0.886 | 0.172 | C0948008   |
| Ischemic stroke                                     | C0948008 | CILP2        | 148113   | Q8IUL8  | cartilage intermediate lay    |             | 0.886 | 0.172 | C0948008   |
| Ischemic stroke                                     | C0948008 | CYP2B7P      | 1556     |         | cytochrome P450 family 2 s    |             | 0.857 | 0.172 | C0948008   |
| Ischemic stroke                                     | C0948008 | UBR3         | 130507   | Q6ZT12  | ubiquitin protein ligase E    |             | 0.857 | 0.103 | C0948008   |
| Ischemic stroke                                     | C0948008 | ARL6IP6      | 151188   | Q8N6S5  | ADP ribosylation factor li    |             | 0.857 | 0.172 | C0948008   |
| Ischemic stroke                                     | C0948008 | NINJ2        | 4815     | Q9NZG7  | ninjurin; cell adhesion mol   |             | 0.834 | 0.103 | C0948008   |
| Ischemic stroke                                     | C0948008 | SLC17A3      | 10786    | Q00476  | solute carrier transporter    |             | 0.834 | 0.241 | C0948008   |
| Ischemic stroke                                     | C0948008 | RASIP1       | 54922    | Q5U651  | Ras interacting protein 1     |             | 0.834 | 0.207 | C0948008   |
| Ischemic stroke                                     | C0948008 | PTCSC3       | 1.01E+08 |         | papillary thyroid carcinom    |             | 0.834 | 0.138 | C0948008   |
| Ischemic stroke                                     | C0948008 | IL1F10       | 84639    | Q8WWZ1  | interleukin 1 family membe    |             | 0.815 | 0.276 | C0948008   |
| Ischemic stroke                                     | C0948008 | NPAS4        | 266743   | Q8IUM7  | neuronal nucleic acid bind    |             | 0.815 | 0.138 | C0948008   |
| Ischemic stroke                                     | C0948008 | SERPINA9     | 327657   | Q86WD7  | serpin f; enzyme modulator    |             | 0.815 | 0.207 | C0948008   |
| Ischemic stroke                                     | C0948008 | RUVBL2       | 10856    | Q9Y230  | RuvB like AAA ATPase 2        |             | 0.799 | 0.276 | C0948008   |
| Ischemic stroke                                     | C0948008 | ASIC5        | 51802    | Q9NY37  | acid sens; transporter        |             | 0.799 | 0.345 | C0948008   |
| Ischemic stroke                                     | C0948008 | MIAT         | 440823   |         | myocardial infarction asso    |             | 0.799 | 0.207 | C0948008   |
| Ischemic stroke                                     | C0948008 | LLGL2        | 3993     | Q6P1M3  | LLGL2, s; membrane traffic    |             | 0.785 | 0.172 | C0948008   |
| Ischemic stroke                                     | C0948008 | IRX4         | 50805    | P78413  | iroquois; nucleic acid bind   |             | 0.785 | 0.172 | C0948008   |
| Ischemic stroke                                     | C0948008 | AGXT2        | 64902    | Q9BYV1  | alanine--glyoxylate aminot    |             | 0.785 | 0.345 | C0948008   |
| Ischemic stroke                                     | C0948008 | HOMER2       | 9455     | Q9NSB8  | homer sc; signaling molecu    |             | 0.773 | 0.276 | C0948008   |
| Ischemic stroke                                     | C0948008 | HSPA12B      | 116835   | Q96MM6  | heat shock protein family     |             | 0.773 | 0.241 | C0948008   |
| Ischemic stroke                                     | C0948008 | CELSR1       | 9620     | Q9NYQ6  | cadherin; cell adhesion mol   |             | 0.762 | 0.345 | C0948008   |
| Ischemic stroke                                     | C0948008 | RCOR1        | 23186    | Q9UKL0  | REST corepressor 1            |             | 0.762 | 0.414 | C0948008   |
| Ischemic stroke                                     | C0948008 | MMD          | 23531    | Q15546  | monocyte receptor             |             | 0.735 | 0.414 | C0948008   |
| Ischemic stroke                                     | C0948008 | RNF146       | 81847    | Q9NTX7  | ring finger protein 146       |             | 0.735 | 0.276 | C0948008   |
| Ischemic stroke                                     | C0948008 | F12          | 2161     | P00748  | coagulat; hydrolase; protea   |             | 0.727 | 0.379 | C0948008   |
| Ischemic stroke                                     | C0948008 | LGALS2       | 3957     | P05162  | galectin; cell adhesion mol   |             | 0.727 | 0.31  | C0948008   |
| Ischemic stroke                                     | C0948008 | NPR3         | 4883     | P17342  | natriuretic peptide recept    |             | 0.727 | 0.414 | C0948008   |
| Ischemic stroke                                     | C0948008 | CYP4F2       | 8529     | P78329  | cytochrome oxidoreductase     |             | 0.727 | 0.276 | C0948008   |
| Ischemic stroke                                     | C0948008 | DHX40        | 79665    | Q8IX18  | DEAH-box; nucleic acid bind   |             | 0.727 | 0.379 | C0948008   |
| Ischemic stroke                                     | C0948008 | CYP4A11      | 1579     | Q02928  | cytochrome oxidoreductase     |             | 0.72  | 0.31  | C0948008   |
| Ischemic stroke                                     | C0948008 | IL18RAP      | 8807     | Q95256  | interleukin receptor          |             | 0.72  | 0.517 | C0948008   |
| Ischemic stroke                                     | C0948008 | KALRN        | 8997     | Q60229  | kalirin; signaling molecu     |             | 0.72  | 0.207 | C0948008   |
| Ischemic stroke                                     | C0948008 | ALDH1L1      | 10840    | Q75891  | aldehyde oxidoreductase       |             | 0.72  | 0.414 | C0948008   |
| Ischemic stroke                                     | C0948008 | GALNT2       | 2590     | Q10471  | polypept; transferase         |             | 0.713 | 0.345 | C0948008   |
| Ischemic stroke                                     | C0948008 | ADAM11       | 4185     | Q75078  | ADAM met; hydrolase; protea   |             | 0.713 | 0.414 | C0948008   |
| Ischemic stroke                                     | C0948008 | SPIDR        | 23514    | Q14159  | scaffold protein involved     |             | 0.713 | 0.448 | C0948008   |
| Ischemic stroke                                     | C0948008 | FLAD1        | 80308    | Q8NFF5  | flavin adenine dinucleotic    |             | 0.713 | 0.414 | C0948008   |
| Ischemic stroke                                     | C0948008 | KDM2B        | 84678    | Q8NHM5  | lysine demethylase 2B         |             | 0.713 | 0.414 | C0948008   |
| Ischemic stroke                                     | C0948008 | GJA4         | 2701     | P35212  | gap junc; cell junction pro   |             | 0.701 | 0.276 | C0948008   |
| Ischemic stroke                                     | C0948008 | RNLS         | 55328    | Q5VYX0  | renalase, FAD dependent am    |             | 0.701 | 0.379 | C0948008   |
| Ischemic stroke                                     | C0948008 | IMPA2        | 3613     | Q14732  | inositol; hydrolase; phosph   |             | 0.696 | 0.276 | C0948008   |
| Ischemic stroke                                     | C0948008 | IL5RA        | 3568     | Q01344  | interleukin defense/immunity  |             | 0.69  | 0.552 | C0948008   |
| Ischemic stroke                                     | C0948008 | PSMA6        | 5687     | P60900  | proteasome; hydrolase; protea |             | 0.69  | 0.379 | C0948008   |
| Ischemic stroke                                     | C0948008 | HOMER1       | 9456     | Q86YM7  | homer sc; signaling molecu    |             | 0.69  | 0.241 | C0948008   |
| Ischemic stroke                                     | C0948008 | TRPM4        | 54795    | Q8TD43  | transient receptor; transpo   |             | 0.69  | 0.379 | C0948008   |
| Ischemic stroke                                     | C0948008 | DEFB104A     | 140596   | Q8WTQ1  | defensin beta 104A            |             | 0.69  | 0.483 | C0948008   |
| Ischemic stroke                                     | C0948008 | DEFB104B     | 503618   | Q8WTQ1  | defensin beta 104B            |             | 0.69  | 0.483 | C0948008   |
| Ischemic stroke                                     | C0948008 | LOC107984148 | 1.08E+08 |         | beta-defensin 104A            |             | 0.69  | 0.483 | C0948008   |
| Ischemic stroke                                     | C0948008 | FGG          | 2266     | P02679  | fibrinogen; signaling molecu  |             | 0.681 | 0.379 | C0948008   |
| Ischemic stroke                                     | C0948008 | KCNJ13       | 3769     | Q60928  | potassium voltage-gated ch    |             | 0.681 | 0.172 | C0948008   |
| Ischemic stroke                                     | C0948008 | PRKCH        | 5583     | P24723  | protein; calcium-binding p    |             | 0.676 | 0.483 | C0948008   |

|                 |          |                 |        |        |                                    |       |       |          |
|-----------------|----------|-----------------|--------|--------|------------------------------------|-------|-------|----------|
| Ischemic stroke | C0948008 | SAA@            | 6287   |        | serum amyloid A1 cluster           | 0.672 | 0.552 | C0948008 |
| Ischemic stroke | C0948008 | GNLY            | 10578  | P22749 | granulysin                         | 0.672 | 0.552 | C0948008 |
| Ischemic stroke | C0948008 | SELENOS         | 55829  | Q9BQE4 | selenoprotein S                    | 0.672 | 0.448 | C0948008 |
| Ischemic stroke | C0948008 | MEPE            | 56955  | Q9NQ76 | matrix extracellular phosph        | 0.672 | 0.483 | C0948008 |
| Ischemic stroke | C0948008 | SMURF2          | 64750  | Q9HAU4 | SMAD specific ligase               | 0.672 | 0.448 | C0948008 |
| Ischemic stroke | C0948008 | GAMT            | 2593   | Q14353 | guanidinoacetate N-methylt         | 0.667 | 0.241 | C0948008 |
| Ischemic stroke | C0948008 | CIRBP           | 1153   | Q14011 | cold inducible nucleic acid bind   | 0.663 | 0.448 | C0948008 |
| Ischemic stroke | C0948008 | TBXAS1          | 6916   | P24557 | thromboxane A synthase 1           | 0.663 | 0.552 | C0948008 |
| Ischemic stroke | C0948008 | CYP2J2          | 1573   | P51589 | cytochrome P450 family 2 s         | 0.659 | 0.414 | C0948008 |
| Ischemic stroke | C0948008 | SHC1            | 6464   | P29353 | SHC adaptor signaling molecu       | 0.659 | 0.414 | C0948008 |
| Ischemic stroke | C0948008 | MADD            | 8567   | Q8WYG6 | MAP kinase activating deat         | 0.659 | 0.414 | C0948008 |
| Ischemic stroke | C0948008 | TRIB1           | 10221  | Q96RU8 | tribbles kinase; transfera         | 0.659 | 0.379 | C0948008 |
| Ischemic stroke | C0948008 | CAMKK2          | 10645  | Q96RR4 | calcium/calmodulin depende         | 0.659 | 0.517 | C0948008 |
| Ischemic stroke | C0948008 | ANGPTL3         | 27329  | Q9Y5C1 | angiopoietin signaling molecu      | 0.659 | 0.276 | C0948008 |
| Ischemic stroke | C0948008 | ZFH3            | 463    | Q15911 | zinc finger homeobox 3             | 0.656 | 0.517 | C0948008 |
| Ischemic stroke | C0948008 | F11             | 2160   | P03951 | coagulation hydrolase; protea      | 0.656 | 0.414 | C0948008 |
| Ischemic stroke | C0948008 | LTC4S           | 4056   | Q16873 | leukotriene transferase            | 0.656 | 0.483 | C0948008 |
| Ischemic stroke | C0948008 | PLIN1           | 5346   | O60240 | perilipin 1                        | 0.656 | 0.379 | C0948008 |
| Ischemic stroke | C0948008 | IRF9            | 10379  | Q00978 | interferon nucleic acid bind       | 0.656 | 0.552 | C0948008 |
| Ischemic stroke | C0948008 | DUOX1           | 53905  | Q9NRD9 | dual oxidase oxidoreductase        | 0.656 | 0.517 | C0948008 |
| Ischemic stroke | C0948008 | APLNR           | 187    | P35414 | apelin receptor                    | 0.652 | 0.345 | C0948008 |
| Ischemic stroke | C0948008 | GRM2            | 2912   | Q14416 | glutamate receptor                 | 0.645 | 0.414 | C0948008 |
| Ischemic stroke | C0948008 | CARD8           | 22900  | Q9Y2G2 | caspase recruitment domain         | 0.645 | 0.552 | C0948008 |
| Ischemic stroke | C0948008 | COL4A2          | 1284   | P08572 | collagen type IV alpha 2 c         | 0.642 | 0.448 | C0948008 |
| Ischemic stroke | C0948008 | P2RY1           | 5028   | P47900 | purinergic receptor P2Y1           | 0.642 | 0.586 | C0948008 |
| Ischemic stroke | C0948008 | SERPINI1        | 5274   | Q99574 | serpin family enzyme modulator     | 0.642 | 0.31  | C0948008 |
| Ischemic stroke | C0948008 | MASP2           | 10747  | O00187 | mannan binding hydrolase; protea   | 0.642 | 0.655 | C0948008 |
| Ischemic stroke | C0948008 | P2RY12          | 64805  | Q9H244 | purinergic receptor                | 0.642 | 0.379 | C0948008 |
| Ischemic stroke | C0948008 | CYP2C8          | 1558   | P10632 | cytochrome P450 family 2 s         | 0.639 | 0.517 | C0948008 |
| Ischemic stroke | C0948008 | GRIA2           | 2891   | P42262 | glutamate ionotropic recep         | 0.639 | 0.414 | C0948008 |
| Ischemic stroke | C0948008 | HABP2           | 3026   | Q14520 | hyaluronan hydrolase; protea       | 0.639 | 0.448 | C0948008 |
| Ischemic stroke | C0948008 | SERPINE2        | 5270   | P07093 | serpin family enzyme modulator     | 0.639 | 0.517 | C0948008 |
| Ischemic stroke | C0948008 | PTPRG           | 5793   | P23470 | protein tyrosine hydrolase; phosph | 0.639 | 0.69  | C0948008 |
| Ischemic stroke | C0948008 | GP6             | 51206  | Q9HCN6 | glycoprotein defense/immunity      | 0.639 | 0.448 | C0948008 |
| Ischemic stroke | C0948008 | VKORC1          | 79001  | Q9BQB6 | vitamin K oxidoreductase           | 0.639 | 0.655 | C0948008 |
| Ischemic stroke | C0948008 | TNFSF12-TNFSF13 | 407977 | O43508 | TNFSF12-TNFSF13 readthroug         | 0.639 | 0.517 | C0948008 |
| Ischemic stroke | C0948008 | FADS1           | 3992   | O60427 | fatty acid desaturase 1            | 0.636 | 0.621 | C0948008 |
| Ischemic stroke | C0948008 | LTA4H           | 4048   | P09960 | leukotriene A4 hydrolase           | 0.636 | 0.483 | C0948008 |
| Ischemic stroke | C0948008 | NEIL1           | 79661  | Q96FI4 | nei like DNA glycosylase 1         | 0.636 | 0.586 | C0948008 |
| Ischemic stroke | C0948008 | ZC3H12A         | 80149  | Q5D1E8 | zinc finger nucleic acid bind      | 0.636 | 0.552 | C0948008 |
| Ischemic stroke | C0948008 | ALOX5AP         | 241    | P20292 | arachidonate transferase           | 0.633 | 0.552 | C0948008 |
| Ischemic stroke | C0948008 | EPHX2           | 2053   | P34913 | epoxide hydrolase; protea          | 0.633 | 0.448 | C0948008 |
| Ischemic stroke | C0948008 | CARTPT          | 9607   | Q16568 | CART prepropeptide                 | 0.633 | 0.448 | C0948008 |
| Ischemic stroke | C0948008 | GRIN1           | 2902   | Q05586 | glutamate ionotropic recep         | 0.63  | 0.448 | C0948008 |
| Ischemic stroke | C0948008 | CAPN10          | 11132  | Q9HC96 | calpain calcium-binding p          | 0.63  | 0.483 | C0948008 |
| Ischemic stroke | C0948008 | PDE11A          | 50940  | Q9HCR9 | phosphodiesterase 11A              | 0.627 | 0.517 | C0948008 |
| Ischemic stroke | C0948008 | BARD1           | 580    | Q99728 | BRCA1 associated RING doma         | 0.624 | 0.379 | C0948008 |
| Ischemic stroke | C0948008 | PTGIS           | 5740   | Q16647 | prostaglandin I2 synthase          | 0.624 | 0.552 | C0948008 |
| Ischemic stroke | C0948008 | ACD             | 65057  | Q96AP0 | ACD, shelterin complex sub         | 0.624 | 0.69  | C0948008 |
| Ischemic stroke | C0948008 | GRIK2           | 2898   | Q13002 | glutamate ionotropic recep         | 0.621 | 0.586 | C0948008 |
| Ischemic stroke | C0948008 | SELPLG          | 6404   | Q14242 | selectin P ligand                  | 0.621 | 0.517 | C0948008 |
| Ischemic stroke | C0948008 | PLK2            | 10769  | Q9NYY3 | polo like kinase 2                 | 0.621 | 0.586 | C0948008 |
| Ischemic stroke | C0948008 | REM1            | 28954  | O75628 | RRAD and GEM like GTPase 1         | 0.621 | 0.655 | C0948008 |
| Ischemic stroke | C0948008 | EDIL3           | 10085  | O43854 | EGF like cell adhesion mol         | 0.619 | 0.517 | C0948008 |
| Ischemic stroke | C0948008 | SORBS1          | 10580  | Q9BX66 | sorbin and SH3 domain cont         | 0.619 | 0.724 | C0948008 |
| Ischemic stroke | C0948008 | BHMT            | 635    | Q93088 | betaine-homocysteine S-me          | 0.616 | 0.483 | C0948008 |
| Ischemic stroke | C0948008 | MUT             | 4594   | P22033 | methylmalonate isomerase           | 0.616 | 0.655 | C0948008 |
| Ischemic stroke | C0948008 | CHDH            | 55349  | Q8NE62 | choline oxidoreductase             | 0.616 | 0.517 | C0948008 |
| Ischemic stroke | C0948008 | RAPSN           | 5913   | Q13702 | receptor associated protei         | 0.614 | 0.586 | C0948008 |
| Ischemic stroke | C0948008 | APOH            | 350    | P02749 | apolipoprotein H                   | 0.611 | 0.724 | C0948008 |
| Ischemic stroke | C0948008 | TLR8            | 51311  | Q9NR97 | toll like receptor 8               | 0.611 | 0.655 | C0948008 |
| Ischemic stroke | C0948008 | MUSK            | 4593   | O15146 | muscle associated receptor         | 0.609 | 0.621 | C0948008 |
| Ischemic stroke | C0948008 | APOA5           | 116519 | Q6Q788 | apolipoprotein A5                  | 0.609 | 0.483 | C0948008 |

|                 |          |          |          |        |                       |                    |       |       |          |
|-----------------|----------|----------|----------|--------|-----------------------|--------------------|-------|-------|----------|
| Ischemic stroke | C0948008 | ADD1     | 118      | P35611 | adducin               | cytoskeletal prot  | 0.607 | 0.517 | C0948008 |
| Ischemic stroke | C0948008 | PTGER2   | 5732     | P43116 | prostaglandin         | receptor           | 0.607 | 0.621 | C0948008 |
| Ischemic stroke | C0948008 | SHMT1    | 6470     | P34896 | serine hydroxymethyl  | transferase        | 0.607 | 0.517 | C0948008 |
| Ischemic stroke | C0948008 | IL17B    | 27190    | Q9UHF5 | interleukin 17B       |                    | 0.607 | 0.655 | C0948008 |
| Ischemic stroke | C0948008 | FGF      | 2244     | P02675 | fibrinogen            | signaling molecule | 0.604 | 0.552 | C0948008 |
| Ischemic stroke | C0948008 | BTF3P11  | 690      |        | basic transcription   | factor             | 0.602 | 0.552 | C0948008 |
| Ischemic stroke | C0948008 | F13A1    | 2162     | P00488 | coagulation           | transferase        | 0.602 | 0.586 | C0948008 |
| Ischemic stroke | C0948008 | SAA1     | 6288     | P0DJ18 | serum amyloid         | defense/immunity   | 0.602 | 0.655 | C0948008 |
| Ischemic stroke | C0948008 | KLF2     | 10365    | Q9Y5W3 | Kruppel               | nucleic acid bind  | 0.602 | 0.586 | C0948008 |
| Ischemic stroke | C0948008 | CRTC1    | 23373    | Q6UUV9 | CREB-regulated        | transcription fac  | 0.602 | 0.621 | C0948008 |
| Ischemic stroke | C0948008 | MIR424   | 494336   |        | microRNA 424          |                    | 0.6   | 0.552 | C0948008 |
| Ischemic stroke | C0948008 | SRF      | 6722     | P11831 | serum response        | transcription fac  | 0.598 | 0.69  | C0948008 |
| Ischemic stroke | C0948008 | TNFSF12  | 8742     | O43508 | TNF superfamily       | member 12          | 0.598 | 0.655 | C0948008 |
| Ischemic stroke | C0948008 | PROCR    | 10544    | Q9UNN8 | protein (enzyme       | modulator;         | 0.598 | 0.552 | C0948008 |
| Ischemic stroke | C0948008 | DUOX2    | 50506    | Q9NRD8 | dual oxidase          | oxidoreductase     | 0.598 | 0.69  | C0948008 |
| Ischemic stroke | C0948008 | ALOX12   | 239      | P18054 | arachidonate          | oxidoreductase     | 0.596 | 0.621 | C0948008 |
| Ischemic stroke | C0948008 | PON2     | 5445     | Q15165 | paraoxonase 2         |                    | 0.596 | 0.621 | C0948008 |
| Ischemic stroke | C0948008 | CPB2     | 1361     | Q961Y4 | carboxypeptidase      | hydrolase; protea  | 0.594 | 0.586 | C0948008 |
| Ischemic stroke | C0948008 | FGA      | 2243     | P02671 | fibrinogen alpha      | chain              | 0.594 | 0.586 | C0948008 |
| Ischemic stroke | C0948008 | SLC2A10  | 81031    | O95528 | solute carrier        | transporter        | 0.594 | 0.621 | C0948008 |
| Ischemic stroke | C0948008 | TCN2     | 6948     | P20062 | transcobalamin 2      |                    | 0.592 | 0.517 | C0948008 |
| Ischemic stroke | C0948008 | PADI4    | 23569    | Q9UM07 | peptidyl arginine     | deiminase          | 0.592 | 0.586 | C0948008 |
| Ischemic stroke | C0948008 | CEACAM1  | 634      | P13688 | carcinoembryonic      | antigen 1          | 0.59  | 0.552 | C0948008 |
| Ischemic stroke | C0948008 | FABP4    | 2167     | P15090 | fatty acid binding    | protein            | 0.59  | 0.552 | C0948008 |
| Ischemic stroke | C0948008 | OLR1     | 4973     | P78380 | oxidized low density  | lipoprotein        | 0.59  | 0.552 | C0948008 |
| Ischemic stroke | C0948008 | APOL1    | 8542     | O14791 | apolipoprotein        | transfer/carrier   | 0.59  | 0.621 | C0948008 |
| Ischemic stroke | C0948008 | GLA      | 2717     | P06280 | galactosidase         | alpha              | 0.588 | 0.621 | C0948008 |
| Ischemic stroke | C0948008 | LRP6     | 4040     | O75581 | LDL receptor          | related prote      | 0.588 | 0.724 | C0948008 |
| Ischemic stroke | C0948008 | F8       | 2157     | P00451 | coagulation           | cell adhesion mol  | 0.586 | 0.655 | C0948008 |
| Ischemic stroke | C0948008 | CCL11    | 6356     | P51671 | C-C motif             | signaling molecule | 0.586 | 0.655 | C0948008 |
| Ischemic stroke | C0948008 | MIR107   | 406901   |        | microRNA 107          |                    | 0.586 | 0.621 | C0948008 |
| Ischemic stroke | C0948008 | FOLH1    | 2346     | Q04609 | folate hydrolase      | hydrolase; protea  | 0.584 | 0.724 | C0948008 |
| Ischemic stroke | C0948008 | REST     | 5978     | Q13127 | RE1 silencing         | transcription fac  | 0.584 | 0.517 | C0948008 |
| Ischemic stroke | C0948008 | PLA2G7   | 7941     | Q13093 | phospholipase         | hydrolase          | 0.584 | 0.552 | C0948008 |
| Ischemic stroke | C0948008 | TRPM7    | 54822    | Q96QT4 | transient receptor    | potassium channel  | 0.584 | 0.552 | C0948008 |
| Ischemic stroke | C0948008 | BCL2A1   | 597      | Q16548 | BCL2-related          | signaling molecule | 0.582 | 0.621 | C0948008 |
| Ischemic stroke | C0948008 | DVL1     | 1855     | O14640 | dishevelled           | enzyme modulator;  | 0.582 | 0.655 | C0948008 |
| Ischemic stroke | C0948008 | TNFSF4   | 7292     | P23510 | TNF superfamily       | signaling molecule | 0.582 | 0.69  | C0948008 |
| Ischemic stroke | C0948008 | CHIT1    | 1118     | Q13231 | chitinase 1           |                    | 0.58  | 0.621 | C0948008 |
| Ischemic stroke | C0948008 | MMP10    | 4319     | P09238 | matrix metallo        | hydrolase; protea  | 0.58  | 0.759 | C0948008 |
| Ischemic stroke | C0948008 | TNFSF14  | 8740     | O43557 | TNF superfamily       | signaling molecule | 0.58  | 0.586 | C0948008 |
| Ischemic stroke | C0948008 | MIR497   | 574456   |        | microRNA 497          |                    | 0.58  | 0.586 | C0948008 |
| Ischemic stroke | C0948008 | AHSG     | 197      | P02765 | alpha 2-macroglobulin | enzyme modulator   | 0.577 | 0.69  | C0948008 |
| Ischemic stroke | C0948008 | GPR42    | 2866     | O15529 | G protein-coupled     | receptor           | 0.577 | 0.69  | C0948008 |
| Ischemic stroke | C0948008 | MLXIPL   | 51085    | Q9NP71 | MLX interacting       | protein like       | 0.577 | 0.655 | C0948008 |
| Ischemic stroke | C0948008 | PINK1    | 65018    | Q9BXM7 | PTEN inducible        | kinase; receptor;  | 0.577 | 0.586 | C0948008 |
| Ischemic stroke | C0948008 | GPX3     | 2878     | P22352 | glutathione           | oxidoreductase     | 0.575 | 0.586 | C0948008 |
| Ischemic stroke | C0948008 | IL20     | 50604    | Q9NYY1 | interleukin 20        |                    | 0.575 | 0.69  | C0948008 |
| Ischemic stroke | C0948008 | SERPINA3 | 12       | P01011 | serpin family         | enzyme modulator   | 0.572 | 0.69  | C0948008 |
| Ischemic stroke | C0948008 | CYP11B2  | 1585     | P19099 | cytochrome P450       | family 11          | 0.572 | 0.483 | C0948008 |
| Ischemic stroke | C0948008 | PDE4D    | 5144     | Q08499 | phosphodiesterase     | 4D                 | 0.572 | 0.69  | C0948008 |
| Ischemic stroke | C0948008 | SLC1A2   | 6506     | P43004 | solute carrier        | transporter        | 0.572 | 0.517 | C0948008 |
| Ischemic stroke | C0948008 | TREM2    | 54209    | Q9NZC2 | triggering receptor   | expressed on       | 0.572 | 0.552 | C0948008 |
| Ischemic stroke | C0948008 | PCSK9    | 255738   | Q8NBP7 | proprotein            | hydrolase; protea  | 0.572 | 0.552 | C0948008 |
| Ischemic stroke | C0948008 | ACVRL1   | 94       | P37023 | activin               | kinase; receptor;  | 0.57  | 0.621 | C0948008 |
| Ischemic stroke | C0948008 | PGR-AS1  | 1.01E+08 |        | PGR antisense RNA     | 1                  | 0.57  | 0.586 | C0948008 |
| Ischemic stroke | C0948008 | BRS3     | 680      | P32247 | bombesin receptor     | subtype            | 0.569 | 0.69  | C0948008 |
| Ischemic stroke | C0948008 | MIR132   | 406921   |        | microRNA 132          |                    | 0.569 | 0.759 | C0948008 |
| Ischemic stroke | C0948008 | NPPB     | 4879     | P16860 | natriuretic peptide   | B                  | 0.567 | 0.552 | C0948008 |
| Ischemic stroke | C0948008 | ITGA2    | 3673     | P17301 | integrin subunit      | alpha 2            | 0.565 | 0.655 | C0948008 |
| Ischemic stroke | C0948008 | PC       | 5091     | P11498 | pyruvate              | ligase             | 0.565 | 0.724 | C0948008 |
| Ischemic stroke | C0948008 | ORAI1    | 84876    | Q96D31 | ORAI calcium          | release-activ      | 0.565 | 0.655 | C0948008 |
| Ischemic stroke | C0948008 | A2M      | 2        | P01023 | alpha-2-macroglobulin | defense/immunity   | 0.564 | 0.724 | C0948008 |

|                 |          |            |        |        |                                                         |       |       |          |
|-----------------|----------|------------|--------|--------|---------------------------------------------------------|-------|-------|----------|
| Ischemic stroke | C0948008 | CIITA      | 4261   | P33076 | class II major histocompat                              | 0.564 | 0.724 | C0948008 |
| Ischemic stroke | C0948008 | CCL22      | 6367   | O00626 | C-C motif signaling molecu                              | 0.564 | 0.69  | C0948008 |
| Ischemic stroke | C0948008 | NAMPT      | 10135  | P43490 | nicotina signaling molecu                               | 0.564 | 0.69  | C0948008 |
| Ischemic stroke | C0948008 | PTGES      | 9536   | O14684 | prostaglandin E synthase                                | 0.562 | 0.69  | C0948008 |
| Ischemic stroke | C0948008 | MIR499A    | 574501 |        | microRNA 499a                                           | 0.562 | 0.69  | C0948008 |
| Ischemic stroke | C0948008 | SSTR4      | 6754   | P31391 | somatostatin receptor                                   | 0.558 | 0.69  | C0948008 |
| Ischemic stroke | C0948008 | MIR29B1    | 407024 |        | microRNA 29b-1                                          | 0.558 | 0.69  | C0948008 |
| Ischemic stroke | C0948008 | DEFB4B     | 1E+08  | O15263 | defensin defense/immunity                               | 0.558 | 0.724 | C0948008 |
| Ischemic stroke | C0948008 | CAD        | 790    | P27708 | carbamoyl hydrolase; ligase                             | 0.557 | 0.655 | C0948008 |
| Ischemic stroke | C0948008 | C20orf181  | 1E+08  |        | chromosome 20 open reading                              | 0.557 | 0.69  | C0948008 |
| Ischemic stroke | C0948008 | CETP       | 1071   | P11597 | cholesteryl ester transfer                              | 0.555 | 0.655 | C0948008 |
| Ischemic stroke | C0948008 | DEFB1      | 1672   | P60022 | defensin beta 1                                         | 0.555 | 0.655 | C0948008 |
| Ischemic stroke | C0948008 | SERPINC1   | 462    | P01008 | serpin f enzyme modulator                               | 0.554 | 0.621 | C0948008 |
| Ischemic stroke | C0948008 | CRYZ       | 1429   | Q08257 | crystallin zeta                                         | 0.554 | 0.621 | C0948008 |
| Ischemic stroke | C0948008 | MOK        | 5891   | Q9UQ07 | MOK protein kinase; transfera                           | 0.554 | 0.655 | C0948008 |
| Ischemic stroke | C0948008 | STIM1      | 6786   | Q13586 | stromal interaction molecu                              | 0.554 | 0.655 | C0948008 |
| Ischemic stroke | C0948008 | MIR29B2    | 407025 |        | microRNA 29b-2                                          | 0.554 | 0.724 | C0948008 |
| Ischemic stroke | C0948008 | SLC19A1    | 6573   | P41440 | solute carrier transporter                              | 0.552 | 0.621 | C0948008 |
| Ischemic stroke | C0948008 | DEFB4A     | 1673   | O15263 | defensin defense/immunity                               | 0.551 | 0.724 | C0948008 |
| Ischemic stroke | C0948008 | SLC33A1    | 9197   | O00400 | solute carrier transporter                              | 0.551 | 0.655 | C0948008 |
| Ischemic stroke | C0948008 | CYBA       | 1535   | P13498 | cytochrome b-245 alpha cha                              | 0.55  | 0.655 | C0948008 |
| Ischemic stroke | C0948008 | FLG        | 2312   | P20930 | filaggrin                                               | 0.55  | 0.655 | C0948008 |
| Ischemic stroke | C0948008 | CDKN2B-AS1 | 1E+08  |        | CDKN2B antisense RNA 1                                  | 0.55  | 0.586 | C0948008 |
| Ischemic stroke | C0948008 | ADRA1A     | 148    | P35348 | adrenoceptor                                            | 0.548 | 0.69  | C0948008 |
| Ischemic stroke | C0948008 | ITGA2B     | 3674   | P08514 | integrin subunit alpha 2b                               | 0.548 | 0.517 | C0948008 |
| Ischemic stroke | C0948008 | F7         | 2155   | P08709 | coagulation hydrolase; protea                           | 0.547 | 0.69  | C0948008 |
| Ischemic stroke | C0948008 | IRF4       | 3662   | Q15306 | interferon nucleic acid bind                            | 0.547 | 0.517 | C0948008 |
| Ischemic stroke | C0948008 | TNFRSF12A  | 51330  | Q9NP84 | TNF receptor superfamily m                              | 0.547 | 0.586 | C0948008 |
| Ischemic stroke | C0948008 | NPPA       | 4878   | P01160 | natriuretic peptide A                                   | 0.546 | 0.69  | C0948008 |
| Ischemic stroke | C0948008 | ADRA2B     | 151    | P18089 | adrenoceptor                                            | 0.545 | 0.69  | C0948008 |
| Ischemic stroke | C0948008 | WRN        | 7486   | Q14191 | Werner syndrome nucleic acid bind                       | 0.545 | 0.586 | C0948008 |
| Ischemic stroke | C0948008 | TFPI2      | 7980   | P48307 | tissue factor enzyme modulator                          | 0.545 | 0.621 | C0948008 |
| Ischemic stroke | C0948008 | NR4A3      | 8013   | Q92570 | nuclear receptor; transcr                               | 0.545 | 0.759 | C0948008 |
| Ischemic stroke | C0948008 | VPS51      | 738    | Q9UID3 | VPS51, GARP complex subuni                              | 0.543 | 0.655 | C0948008 |
| Ischemic stroke | C0948008 | IL16       | 3603   | Q14005 | interleukin signaling molecu                            | 0.543 | 0.793 | C0948008 |
| Ischemic stroke | C0948008 | PRH1       | 5554   | P02810 | proline rich protein HaeII                              | 0.543 | 0.69  | C0948008 |
| Ischemic stroke | C0948008 | CDK5       | 1020   | Q00535 | cyclin dependent kinase; transfera                      | 0.542 | 0.69  | C0948008 |
| Ischemic stroke | C0948008 | CYP2C9     | 1559   | P11712 | cytochrome P450 family 2 s                              | 0.542 | 0.759 | C0948008 |
| Ischemic stroke | C0948008 | PDGFA      | 5154   | P04085 | platelet signaling molecu                               | 0.542 | 0.621 | C0948008 |
| Ischemic stroke | C0948008 | TLR7       | 51284  | Q9NYK1 | toll like receptor 7                                    | 0.542 | 0.759 | C0948008 |
| Ischemic stroke | C0948008 | ACE2       | 59272  | Q9BYF1 | angiotensin hydrolase; protea                           | 0.542 | 0.655 | C0948008 |
| Ischemic stroke | C0948008 | ACTA2      | 59     | P62736 | actin, a cytoskeletal prot                              | 0.54  | 0.69  | C0948008 |
| Ischemic stroke | C0948008 | MIP        | 4284   | P30301 | major intrinsic transporter                             | 0.54  | 0.759 | C0948008 |
| Ischemic stroke | C0948008 | SULT1E1    | 6783   | P49888 | sulfotransferase family 1E                              | 0.538 | 0.759 | C0948008 |
| Ischemic stroke | C0948008 | LPAR2      | 9170   | Q9HBW0 | lysophosphatidate receptor                              | 0.537 | 0.69  | C0948008 |
| Ischemic stroke | C0948008 | PPIG       | 9360   | Q13427 | peptidylprolyl isomerase G                              | 0.537 | 0.793 | C0948008 |
| Ischemic stroke | C0948008 | PIN1       | 5300   | Q13526 | peptidylprolyl cis/trans is                             | 0.536 | 0.655 | C0948008 |
| Ischemic stroke | C0948008 | ADAMTS13   | 11093  | Q76LX8 | ADAM metallopeptidase with thrombospondin type 1 motifs | 0.536 | 0.69  | C0948008 |
| Ischemic stroke | C0948008 | MIR143     | 406935 |        | microRNA 143                                            | 0.536 | 0.621 | C0948008 |
| Ischemic stroke | C0948008 | GCH1       | 2643   | P30793 | GTP cyclohydrolase                                      | 0.534 | 0.724 | C0948008 |
| Ischemic stroke | C0948008 | GNB3       | 2784   | P16520 | G protein-coupled enzyme modulator;                     | 0.533 | 0.724 | C0948008 |
| Ischemic stroke | C0948008 | LRP1       | 4035   | Q07954 | LDL receptor related prote                              | 0.533 | 0.724 | C0948008 |
| Ischemic stroke | C0948008 | FGF13      | 2258   | Q92913 | fibroblast growth factor signaling molecu               | 0.532 | 0.621 | C0948008 |
| Ischemic stroke | C0948008 | IL9        | 3578   | P15248 | interleukin 9                                           | 0.53  | 0.69  | C0948008 |
| Ischemic stroke | C0948008 | SGK1       | 6446   | O00141 | serum/glucocorticoid-inducible kinase                   | 0.53  | 0.621 | C0948008 |
| Ischemic stroke | C0948008 | UCP2       | 7351   | P55851 | uncoupling protein 2                                    | 0.53  | 0.69  | C0948008 |
| Ischemic stroke | C0948008 | LIF        | 3976   | P15018 | LIF, interleukin 6 signaling molecu                     | 0.528 | 0.655 | C0948008 |
| Ischemic stroke | C0948008 | TRAF6      | 7189   | Q9Y4K3 | TNF receptor signaling molecu                           | 0.528 | 0.724 | C0948008 |
| Ischemic stroke | C0948008 | MSC        | 9242   | O60682 | musculin                                                | 0.526 | 0.655 | C0948008 |
| Ischemic stroke | C0948008 | AQP4       | 361    | P55087 | aquaporin 4 transporter                                 | 0.525 | 0.793 | C0948008 |
| Ischemic stroke | C0948008 | KCNQ1      | 3784   | P51787 | potassium voltage-gated ch                              | 0.525 | 0.586 | C0948008 |
| Ischemic stroke | C0948008 | NTF3       | 4908   | P20783 | neurotrophin signaling molecu                           | 0.525 | 0.621 | C0948008 |
| Ischemic stroke | C0948008 | CXCR6      | 10663  | O00574 | C-X-C motif chemokine rece                              | 0.525 | 0.793 | C0948008 |



|                 |          |         |        |          |                            |                   |       |       |          |
|-----------------|----------|---------|--------|----------|----------------------------|-------------------|-------|-------|----------|
| Ischemic stroke | C0948008 | MMRN1   | 22915  | Q13201   | multimer                   | extracellular mat | 0.523 | 0.655 | C0948008 |
| Ischemic stroke | C0948008 | NR3C2   | 4306   | P08235   | nuclear                    | nucleic acid bind | 0.52  | 0.69  | C0948008 |
| Ischemic stroke | C0948008 | SELP    | 6403   | P16109   | selectin P                 |                   | 0.519 | 0.724 | C0948008 |
| Ischemic stroke | C0948008 | CDKN3   | 1033   | Q16667   | cyclin dependent kinase in |                   | 0.518 | 0.724 | C0948008 |
| Ischemic stroke | C0948008 | HSPA1A  | 3303   | PODMV8;P | heat shock protein family  |                   | 0.516 | 0.793 | C0948008 |
| Ischemic stroke | C0948008 | MMP12   | 4321   | P39900   | matrix m                   | hydrolase; protea | 0.516 | 0.862 | C0948008 |
| Ischemic stroke | C0948008 | HSPA1B  | 3304   | PODMV8;P | heat shock protein family  |                   | 0.514 | 0.793 | C0948008 |
| Ischemic stroke | C0948008 | COL4A1  | 1282   | P02462   | collagen type IV alpha 1 c |                   | 0.512 | 0.69  | C0948008 |
| Ischemic stroke | C0948008 | MIR223  | 407008 |          | microRNA 223               |                   | 0.512 | 0.759 | C0948008 |
| Ischemic stroke | C0948008 | EEF1A2  | 1917   | Q05639   | eukaryot                   | enzyme modulator; | 0.51  | 0.69  | C0948008 |
| Ischemic stroke | C0948008 | MTRR    | 4552   | Q9UBK8   | 5-methyltetrahydrofolate-h |                   | 0.51  | 0.655 | C0948008 |
| Ischemic stroke | C0948008 | PITX2   | 5308   | Q99697   | paired like homeodomain 2  |                   | 0.51  | 0.724 | C0948008 |
| Ischemic stroke | C0948008 | PLA2G2A | 5320   | P14555   | phosphol                   | hydrolase         | 0.509 | 0.69  | C0948008 |
| Ischemic stroke | C0948008 | ABCC8   | 6833   | Q09428   | ATP bind                   | transporter       | 0.508 | 0.69  | C0948008 |
| Ischemic stroke | C0948008 | ITGB3   | 3690   | P05106   | integrin                   | cell adhesion mol | 0.507 | 0.69  | C0948008 |
| Ischemic stroke | C0948008 | NRG1    | 3084   | Q02297   | neuregul                   | signaling molecu  | 0.506 | 0.759 | C0948008 |
| Ischemic stroke | C0948008 | THBD    | 7056   | P07204   | thrombomodulin             |                   | 0.505 | 0.759 | C0948008 |
| Ischemic stroke | C0948008 | LPL     | 4023   | P06858   | lipoprot                   | hydrolase; storag | 0.504 | 0.724 | C0948008 |
| Ischemic stroke | C0948008 | IL21    | 59067  | Q9HBE4   | interleukin 21             |                   | 0.504 | 0.759 | C0948008 |
| Ischemic stroke | C0948008 | P2RX7   | 5027   | Q99572   | purinerg                   | receptor; transpo | 0.503 | 0.759 | C0948008 |
| Ischemic stroke | C0948008 | CHI3L1  | 1116   | P36222   | chitinase 3 like 1         |                   | 0.502 | 0.793 | C0948008 |
| Ischemic stroke | C0948008 | PLA2G1B | 5319   | P04054   | phosphol                   | hydrolase         | 0.502 | 0.793 | C0948008 |
| Ischemic stroke | C0948008 | CYP2C19 | 1557   | P33261   | cytochrome P450 family 2 s |                   | 0.501 | 0.793 | C0948008 |
| Ischemic stroke | C0948008 | HDAC9   | 9734   | Q9UKV0   | histone deacetylase 9      |                   | 0.501 | 0.759 | C0948008 |
| Ischemic stroke | C0948008 | GDF15   | 9518   | Q99988   | growth d                   | signaling molecu  | 0.496 | 0.621 | C0948008 |
| Ischemic stroke | C0948008 | ANGPT1  | 284    | Q15389   | angiopo                    | signaling molecu  | 0.495 | 0.69  | C0948008 |
| Ischemic stroke | C0948008 | PTGS1   | 5742   | P23219   | prostagl                   | oxidoreductase    | 0.495 | 0.828 | C0948008 |
| Ischemic stroke | C0948008 | PLA2G6  | 8398   | O60733   | phosphol                   | enzyme modulator  | 0.494 | 0.724 | C0948008 |
| Ischemic stroke | C0948008 | ACKR3   | 57007  | P25106   | atypical chemokine recepto |                   | 0.494 | 0.759 | C0948008 |
| Ischemic stroke | C0948008 | MTR     | 4548   | Q99707   | 5-methyltetrahydrofolate-h |                   | 0.493 | 0.724 | C0948008 |
| Ischemic stroke | C0948008 | EDNRB   | 1910   | P24530   | endothelin receptor type B |                   | 0.492 | 0.793 | C0948008 |
| Ischemic stroke | C0948008 | PECAM1  | 5175   | P16284   | platelet                   | cell adhesion mol | 0.492 | 0.69  | C0948008 |
| Ischemic stroke | C0948008 | ABO     | 28     | P16442   | ABO, alp                   | transferase       | 0.491 | 0.828 | C0948008 |
| Ischemic stroke | C0948008 | UGT1A1  | 54658  | P22309   | UDP glucuronosyltransferas |                   | 0.491 | 0.724 | C0948008 |
| Ischemic stroke | C0948008 | LPA     | 4018   | P08519   | lipoprot                   | hydrolase; protea | 0.489 | 0.655 | C0948008 |
| Ischemic stroke | C0948008 | AVP     | 551    | P01185   | arginine                   | signaling molecu  | 0.486 | 0.759 | C0948008 |
| Ischemic stroke | C0948008 | ADIPOQ  | 9370   | Q15848   | adiponectin, C1Q and colla |                   | 0.485 | 0.724 | C0948008 |
| Ischemic stroke | C0948008 | ABCA1   | 19     | O95477   | ATP bind                   | transporter       | 0.484 | 0.793 | C0948008 |
| Ischemic stroke | C0948008 | ALOX5   | 240    | P09917   | arachido                   | oxidoreductase    | 0.482 | 0.724 | C0948008 |
| Ischemic stroke | C0948008 | KCNA3   | 3738   | P22001   | potassium voltage-gated ch |                   | 0.481 | 0.724 | C0948008 |
| Ischemic stroke | C0948008 | PRH2    | 5555   | P02810   | proline rich protein HaeII |                   | 0.48  | 0.759 | C0948008 |
| Ischemic stroke | C0948008 | ADRB2   | 154    | P07550   | adrenoce                   | receptor          | 0.479 | 0.793 | C0948008 |
| Ischemic stroke | C0948008 | ANGPT2  | 285    | O15123   | angiopo                    | signaling molecu  | 0.479 | 0.724 | C0948008 |
| Ischemic stroke | C0948008 | BIRC5   | 332    | O15392   | baculovi                   | enzyme modulator  | 0.479 | 0.655 | C0948008 |
| Ischemic stroke | C0948008 | SELE    | 6401   | P16581   | selectin E                 |                   | 0.479 | 0.793 | C0948008 |
| Ischemic stroke | C0948008 | F2R     | 2149   | P25116   | coagulation factor II thro |                   | 0.478 | 0.759 | C0948008 |
| Ischemic stroke | C0948008 | CFH     | 3075   | P08603   | complement factor H        |                   | 0.478 | 0.793 | C0948008 |
| Ischemic stroke | C0948008 | APOB    | 338    | P04114   | apolipoprotein B           |                   | 0.477 | 0.724 | C0948008 |
| Ischemic stroke | C0948008 | ENG     | 2022   | P17813   | endoglin                   |                   | 0.477 | 0.655 | C0948008 |
| Ischemic stroke | C0948008 | G6PD    | 2539   | P11413   | glucose                    | oxidoreductase    | 0.476 | 0.724 | C0948008 |
| Ischemic stroke | C0948008 | OGG1    | 4968   | O15527   | 8-oxoguanine DNA glycosyla |                   | 0.476 | 0.759 | C0948008 |
| Ischemic stroke | C0948008 | LDLR    | 3949   | P01130   | low density lipoprotein re |                   | 0.475 | 0.828 | C0948008 |
| Ischemic stroke | C0948008 | TLR3    | 7098   | O15455   | toll lik                   | extracellular mat | 0.475 | 0.862 | C0948008 |
| Ischemic stroke | C0948008 | PRNP    | 5621   | F7VJQ1;P | prion protein              |                   | 0.474 | 0.897 | C0948008 |
| Ischemic stroke | C0948008 | AGER    | 177    | Q15109   | advanced                   | cell adhesion mol | 0.472 | 0.724 | C0948008 |
| Ischemic stroke | C0948008 | ADM     | 133    | P35318   | adrenome                   | signaling molecu  | 0.471 | 0.724 | C0948008 |
| Ischemic stroke | C0948008 | MMP7    | 4316   | P09237   | matrix m                   | hydrolase; protea | 0.47  | 0.724 | C0948008 |
| Ischemic stroke | C0948008 | EDNRA   | 1909   | P25101   | endothelin receptor type A |                   | 0.469 | 0.828 | C0948008 |
| Ischemic stroke | C0948008 | FBN1    | 2200   | P35555   | fibrilli                   | calcium-binding p | 0.469 | 0.69  | C0948008 |
| Ischemic stroke | C0948008 | NPY     | 4852   | P01303   | neuropep                   | signaling molecu  | 0.469 | 0.69  | C0948008 |
| Ischemic stroke | C0948008 | NOTCH3  | 4854   | Q9UM47   | notch 3                    |                   | 0.469 | 0.69  | C0948008 |
| Ischemic stroke | C0948008 | R5      | 2153   | P12259   | coagulat                   | cell adhesion mol | 0.468 | 0.69  | C0948008 |
| Ischemic stroke | C0948008 | SEMA6A  | 57556  | Q9H2E6   | semaphor                   | signaling molecu  | 0.468 | 0.793 | C0948008 |



|                 |          |           |        |        |                                               |       |       |          |
|-----------------|----------|-----------|--------|--------|-----------------------------------------------|-------|-------|----------|
| Ischemic stroke | C0948008 | NQO1      | 1728   | P15559 | NAD(P)H quinone dehydrogenase                 | 0.467 | 0.724 | C0948008 |
| Ischemic stroke | C0948008 | TNFRSF11B | 4982   | O00300 | TNF receptor superfamily member 11B           | 0.467 | 0.69  | C0948008 |
| Ischemic stroke | C0948008 | TIMP2     | 7077   | P16035 | TIMP metalloproteinase inhibitor 2            | 0.467 | 0.759 | C0948008 |
| Ischemic stroke | C0948008 | F2        | 2147   | P00734 | coagulation factor II (prothrombin)           | 0.466 | 0.793 | C0948008 |
| Ischemic stroke | C0948008 | IFNB1     | 3456   | P01574 | interferon beta 1                             | 0.466 | 0.793 | C0948008 |
| Ischemic stroke | C0948008 | VCAM1     | 7412   | P19320 | vascular cell adhesion molecule 1             | 0.466 | 0.793 | C0948008 |
| Ischemic stroke | C0948008 | PPARA     | 5465   | Q07869 | peroxisomal long-chain fatty acid CoA ligase  | 0.465 | 0.793 | C0948008 |
| Ischemic stroke | C0948008 | APOA1     | 335    | P02647 | apolipoprotein A1                             | 0.463 | 0.759 | C0948008 |
| Ischemic stroke | C0948008 | IL5       | 3567   | P05113 | interleukin 5                                 | 0.463 | 0.828 | C0948008 |
| Ischemic stroke | C0948008 | LTA       | 4049   | P01374 | lymphotxin alpha                              | 0.463 | 0.862 | C0948008 |
| Ischemic stroke | C0948008 | VWF       | 7450   | P04275 | von Willebrand factor                         | 0.462 | 0.724 | C0948008 |
| Ischemic stroke | C0948008 | COX8A     | 1351   | P10176 | cytochrome b5 heme oxidoreductase             | 0.461 | 0.793 | C0948008 |
| Ischemic stroke | C0948008 | EGR1      | 1958   | P18146 | early growth response 1                       | 0.459 | 0.793 | C0948008 |
| Ischemic stroke | C0948008 | PLAT      | 5327   | P00750 | plasminogen activator                         | 0.459 | 0.828 | C0948008 |
| Ischemic stroke | C0948008 | F3        | 2152   | P13726 | coagulation factor III (prothrombin)          | 0.458 | 0.724 | C0948008 |
| Ischemic stroke | C0948008 | AGTR1     | 185    | P30556 | angiotensin type 1 receptor                   | 0.454 | 0.759 | C0948008 |
| Ischemic stroke | C0948008 | MIR146A   | 406938 |        | microRNA 146a                                 | 0.452 | 0.759 | C0948008 |
| Ischemic stroke | C0948008 | XRCC1     | 7515   | P18887 | X-ray repair cross-complementing factor 1     | 0.449 | 0.828 | C0948008 |
| Ischemic stroke | C0948008 | ABCG2     | 9429   | Q9UNQ0 | ATP-binding cassette, subfamily G, member 2   | 0.449 | 0.793 | C0948008 |
| Ischemic stroke | C0948008 | CD40LG    | 959    | P29965 | CD40 ligand                                   | 0.447 | 0.828 | C0948008 |
| Ischemic stroke | C0948008 | ESR2      | 2100   | Q92731 | estrogen receptor 2                           | 0.445 | 0.828 | C0948008 |
| Ischemic stroke | C0948008 | PON1      | 5444   | P27169 | paraoxonase 1                                 | 0.443 | 0.828 | C0948008 |
| Ischemic stroke | C0948008 | HSPA4     | 3308   | P34932 | heat shock protein family class A member 4    | 0.441 | 0.793 | C0948008 |
| Ischemic stroke | C0948008 | HFE       | 3077   | Q30201 | homeostatic iron regulator                    | 0.44  | 0.69  | C0948008 |
| Ischemic stroke | C0948008 | MMP3      | 4314   | P08254 | matrix metalloproteinase 3                    | 0.439 | 0.793 | C0948008 |
| Ischemic stroke | C0948008 | CDKN2B    | 1030   | P42772 | cyclin dependent kinase inhibitor 2B          | 0.438 | 0.759 | C0948008 |
| Ischemic stroke | C0948008 | CYP2B6    | 1555   | P20813 | cytochrome P450 family 2 subfamily B member 6 | 0.437 | 0.828 | C0948008 |
| Ischemic stroke | C0948008 | MPO       | 4353   | P05164 | myeloperoxidase                               | 0.435 | 0.931 | C0948008 |
| Ischemic stroke | C0948008 | PLAU      | 5328   | P00749 | plasminogen activator, urokinase type         | 0.434 | 0.69  | C0948008 |
| Ischemic stroke | C0948008 | TBC1D9    | 23158  | Q6ZT07 | TBC1 domain family class C member 9           | 0.434 | 0.828 | C0948008 |
| Ischemic stroke | C0948008 | CD40      | 958    | P25942 | CD40 molecule                                 | 0.433 | 0.862 | C0948008 |
| Ischemic stroke | C0948008 | HMGB1     | 3146   | P09429 | high mobility group box 1                     | 0.433 | 0.828 | C0948008 |
| Ischemic stroke | C0948008 | IGF1R     | 3480   | P08069 | insulin-like growth factor receptor           | 0.433 | 0.828 | C0948008 |
| Ischemic stroke | C0948008 | BRCA2     | 675    | P51587 | BRCA2, DNA repair associated                  | 0.426 | 0.793 | C0948008 |
| Ischemic stroke | C0948008 | COMT      | 1312   | P21964 | catechol O-methyltransferase                  | 0.426 | 0.897 | C0948008 |
| Ischemic stroke | C0948008 | EPHB2     | 2048   | P29323 | EPH receptor B2                               | 0.425 | 0.759 | C0948008 |
| Ischemic stroke | C0948008 | EPO       | 2056   | P01588 | erythropoietin                                | 0.425 | 0.759 | C0948008 |
| Ischemic stroke | C0948008 | KDR       | 3791   | P35968 | kinase insert domain receptor                 | 0.423 | 0.724 | C0948008 |
| Ischemic stroke | C0948008 | REN       | 5972   | P00797 | renin                                         | 0.423 | 0.759 | C0948008 |
| Ischemic stroke | C0948008 | CSF3      | 1440   | P09919 | colony stimulating factor 3                   | 0.421 | 0.828 | C0948008 |
| Ischemic stroke | C0948008 | EZH2      | 2146   | Q15910 | enhancer of zeste 2 polycomb target           | 0.421 | 0.759 | C0948008 |
| Ischemic stroke | C0948008 | PLG       | 5340   | P00747 | plasminogen                                   | 0.419 | 0.862 | C0948008 |
| Ischemic stroke | C0948008 | MMP1      | 4312   | P03956 | matrix metalloproteinase 1                    | 0.415 | 0.793 | C0948008 |
| Ischemic stroke | C0948008 | NOTCH1    | 4851   | P46531 | notch 1                                       | 0.415 | 0.759 | C0948008 |
| Ischemic stroke | C0948008 | MIR21     | 406991 |        | microRNA 21                                   | 0.407 | 0.759 | C0948008 |
| Ischemic stroke | C0948008 | AGT       | 183    | P01019 | angiotensinogen                               | 0.406 | 0.862 | C0948008 |
| Ischemic stroke | C0948008 | FGF2      | 2247   | P09038 | fibroblast growth factor 2                    | 0.404 | 0.897 | C0948008 |
| Ischemic stroke | C0948008 | IL18      | 3606   | Q14116 | interleukin 18                                | 0.404 | 0.862 | C0948008 |
| Ischemic stroke | C0948008 | HMOX1     | 3162   | P09601 | heme oxygenase 1                              | 0.403 | 0.862 | C0948008 |
| Ischemic stroke | C0948008 | ATM       | 472    | Q13315 | ATM serine/threonine kinase                   | 0.401 | 0.862 | C0948008 |
| Ischemic stroke | C0948008 | NOS3      | 4846   | P29474 | nitric oxide synthase 3                       | 0.401 | 0.862 | C0948008 |
| Ischemic stroke | C0948008 | CRP       | 1401   | P02741 | C-reactive protein                            | 0.399 | 0.862 | C0948008 |
| Ischemic stroke | C0948008 | IL1RN     | 3557   | P18510 | interleukin 1 receptor antagonist             | 0.398 | 0.897 | C0948008 |
| Ischemic stroke | C0948008 | COX2      | 4513   | P00403 | cytochrome b5 heme oxidoreductase             | 0.397 | 0.862 | C0948008 |
| Ischemic stroke | C0948008 | IL17A     | 3605   | Q16552 | interleukin 17A                               | 0.391 | 0.862 | C0948008 |
| Ischemic stroke | C0948008 | SPP1      | 6696   | P10451 | secreted phosphoprotein 1                     | 0.391 | 0.862 | C0948008 |
| Ischemic stroke | C0948008 | PPARG     | 5468   | P37231 | peroxisomal long-chain fatty acid CoA ligase  | 0.388 | 0.828 | C0948008 |
| Ischemic stroke | C0948008 | MAPK1     | 5594   | P28482 | mitogen-activated protein kinase 1            | 0.387 | 0.862 | C0948008 |
| Ischemic stroke | C0948008 | ICAM1     | 3383   | P05362 | intercellular adhesion molecule 1             | 0.386 | 0.897 | C0948008 |
| Ischemic stroke | C0948008 | SERPINE1  | 5054   | P05121 | serpin family E member 1                      | 0.384 | 0.793 | C0948008 |
| Ischemic stroke | C0948008 | BDNF      | 627    | P23560 | brain derived neurotrophic factor             | 0.382 | 0.828 | C0948008 |
| Ischemic stroke | C0948008 | AR        | 367    | P10275 | androgen receptor                             | 0.38  | 0.793 | C0948008 |
| Ischemic stroke | C0948008 | MMP2      | 4313   | P08253 | matrix metalloproteinase 2                    | 0.373 | 0.862 | C0948008 |

|                 |          |        |      |          |                            |                   |       |       |          |
|-----------------|----------|--------|------|----------|----------------------------|-------------------|-------|-------|----------|
| Ischemic stroke | C0948008 | ABCB1  | 5243 | P08183   | ATP bind                   | hydrolase; protea | 0.371 | 0.828 | C0948008 |
| Ischemic stroke | C0948008 | ACE    | 1636 | P12821   | angioten                   | hydrolase; protea | 0.367 | 0.897 | C0948008 |
| Ischemic stroke | C0948008 | IL1A   | 3552 | P01583   | interleukin 1 alpha        |                   | 0.366 | 0.931 | C0948008 |
| Ischemic stroke | C0948008 | IL4    | 3565 | P05112   | interleukin 4              |                   | 0.364 | 0.931 | C0948008 |
| Ischemic stroke | C0948008 | TLR4   | 7099 | O00206   | toll like receptor 4       |                   | 0.359 | 0.931 | C0948008 |
| Ischemic stroke | C0948008 | ESR1   | 2099 | P03372   | estrogen                   | nucleic acid bind | 0.355 | 0.897 | C0948008 |
| Ischemic stroke | C0948008 | IGF1   | 3479 | P05019   | insulin like growth factor |                   | 0.355 | 0.828 | C0948008 |
| Ischemic stroke | C0948008 | MTHFR  | 4524 | P42898   | methylenetetrahydrofolate  |                   | 0.354 | 0.828 | C0948008 |
| Ischemic stroke | C0948008 | APOE   | 348  | P02649   | apolipoprotein E           |                   | 0.352 | 0.931 | C0948008 |
| Ischemic stroke | C0948008 | CXCL8  | 3576 | P10145   | C-X-C mo                   | signaling molecul | 0.342 | 0.862 | C0948008 |
| Ischemic stroke | C0948008 | MMP9   | 4318 | P14780   | matrix m                   | hydrolase; protea | 0.339 | 0.862 | C0948008 |
| Ischemic stroke | C0948008 | PTGS2  | 5743 | P35354   | prostagl                   | oxidoreductase    | 0.338 | 0.897 | C0948008 |
| Ischemic stroke | C0948008 | TGFB1  | 7040 | P01137   | transfor                   | signaling molecul | 0.336 | 0.931 | C0948008 |
| Ischemic stroke | C0948008 | CDKN2A | 1029 | P42771;Q | cyclin dependent kinase in |                   | 0.321 | 0.828 | C0948008 |
| Ischemic stroke | C0948008 | IL10   | 3586 | P22301   | interleukin 10             |                   | 0.32  | 0.931 | C0948008 |
| Ischemic stroke | C0948008 | IL1B   | 3553 | P01584   | interleukin 1 beta         |                   | 0.312 | 0.931 | C0948008 |
| Ischemic stroke | C0948008 | VEGFA  | 7422 | P15692   | vascular                   | signaling molecul | 0.298 | 0.897 | C0948008 |
| Ischemic stroke | C0948008 | IL6    | 3569 | P05231   | interleukin 6              |                   | 0.287 | 0.966 | C0948008 |
| Ischemic stroke | C0948008 | TNF    | 7124 | P01375   | tumor ne                   | signaling molecul | 0.263 | 0.966 | C0948008 |
| Ischemic stroke | C0948008 | TP53   | 7157 | P04637   | tumor pr                   | transcription fac | 0.251 | 0.897 | C0948008 |

| Index_disease   | Index_dis | Gene       | Gene_id | UniProt   | Gene_FullProtein_CpLI       | DSI_g | DPI_g | diseaseic | 94 IS genes | retrieve genes | 312 IS-related genes |
|-----------------|-----------|------------|---------|-----------|-----------------------------|-------|-------|-----------|-------------|----------------|----------------------|
| Ischemic stroke | C0948008  | MIAT       | 440823  |           | myocardial infarction assoc | 0.799 | 0.207 | C0948008  | MIAT        | MIAT           | ALOX5AP              |
| Ischemic stroke | C0948008  | F12        | 2161    | P00748    | coagulatihydrolase; proteas | 0.727 | 0.379 | C0948008  | F12         | F12            | F2                   |
| Ischemic stroke | C0948008  | PRKCH      | 5583    | P24723    | protein kcalcium-binding pr | 0.676 | 0.483 | C0948008  | PRKCH       | PRKCH          | F5                   |
| Ischemic stroke | C0948008  | ZFH3       | 463     | Q15911    | zinc finger homeobox 3      | 0.656 | 0.517 | C0948008  | ZFH3        | ZFH3           | NOS3                 |
| Ischemic stroke | C0948008  | P2RY12     | 64805   | Q9H244    | purinergireceptor           | 0.642 | 0.379 | C0948008  | P2RY12      | P2RY12         | PDE4D                |
| Ischemic stroke | C0948008  | GP6        | 51206   | Q9HCN6    | glycoprotdefense/immunity p | 0.639 | 0.448 | C0948008  | GP6         | GP6            | PRKCH                |
| Ischemic stroke | C0948008  | HABP2      | 3026    | Q14520    | hyaluronahydrolase; proteas | 0.639 | 0.448 | C0948008  | HABP2       | HABP2          | ACE                  |
| Ischemic stroke | C0948008  | VKORC1     | 79001   | Q9BQB6    | vitamin koxidoreductase     | 0.639 | 0.655 | C0948008  | VKORC1      | VKORC1         | ADORA1               |
| Ischemic stroke | C0948008  | ALOX5AP    | 241     | P20292    | arachidortransferase        | 0.633 | 0.552 | C0948008  | ALOX5AP     | ALOX5AP        | APOA1                |
| Ischemic stroke | C0948008  | EPHX2      | 2053    | P34913    | epoxide lhydrolase; proteas | 0.633 | 0.448 | C0948008  | EPHX2       | EPHX2          | APOE                 |
| Ischemic stroke | C0948008  | GRIN1      | 2902    | Q05586    | glutamate ionotropic recept | 0.63  | 0.448 | C0948008  | GRIN1       | GRIN1          | BAD                  |
| Ischemic stroke | C0948008  | PTGIS      | 5740    | Q16647    | prostaglandin I2 synthase   | 0.624 | 0.552 | C0948008  | PTGIS       | PTGIS          | BDNF                 |
| Ischemic stroke | C0948008  | APOH       | 350     | P02749    | apolipoprotein H            | 0.611 | 0.724 | C0948008  | APOH        | APOH           | CASP3                |
| Ischemic stroke | C0948008  | FGB        | 2244    | P02675    | fibrinogesignaling molecule | 0.604 | 0.552 | C0948008  | FGB         | FGB            | CCL2                 |
| Ischemic stroke | C0948008  | PON2       | 5445    | Q15165    | paraaxonase 2               | 0.596 | 0.621 | C0948008  | PON2        | PON2           | CD163                |
| Ischemic stroke | C0948008  | FGA        | 2243    | P02671    | fibrinogen alpha chain      | 0.594 | 0.586 | C0948008  | FGA         | FGA            | CREB1                |
| Ischemic stroke | C0948008  | CCL11      | 6356    | P51671    | C-C motifsignaling molecule | 0.586 | 0.655 | C0948008  | CCL11       | CCL11          | CYCS                 |
| Ischemic stroke | C0948008  | F8         | 2157    | P00451    | coagulaticell adhesion mole | 0.586 | 0.655 | C0948008  | F8          | F8             | EDN1                 |
| Ischemic stroke | C0948008  | PLA2G7     | 7941    | Q13093    | phospholihydrolase          | 0.584 | 0.552 | C0948008  | PLA2G7      | PLA2G7         | FGA                  |
| Ischemic stroke | C0948008  | PDE4D      | 5144    | Q08499    | phosphodiesterase 4D        | 0.572 | 0.69  | C0948008  | PDE4D       | PDE4D          | FOS                  |
| Ischemic stroke | C0948008  | SLC1A2     | 6506    | P43004    | solute catransporter        | 0.572 | 0.517 | C0948008  | SLC1A2      | SLC1A2         | HBA1                 |
| Ischemic stroke | C0948008  | SERPINC1   | 462     | P01008    | serpin faenzyme modulator   | 0.554 | 0.621 | C0948008  | SERPINC1    | SERPINC1       | IL1B                 |
| Ischemic stroke | C0948008  | CDKN2B-AS1 | 1E+08   |           | CDKN2B antisense RNA 1      | 0.55  | 0.586 | C0948008  | CDKN2B-AS1  | CDKN2B-AS1     | ITGA2B               |
| Ischemic stroke | C0948008  | ITGA2B     | 3674    | P08514    | integrin subunit alpha 2b   | 0.548 | 0.517 | C0948008  | ITGA2B      | ITGA2B         | LPA                  |
| Ischemic stroke | C0948008  | F7         | 2155    | P08709    | coagulatihydrolase; proteas | 0.547 | 0.69  | C0948008  | F7          | F7             | MMP9                 |
| Ischemic stroke | C0948008  | CDK5       | 1020    | Q00535    | cyclin dekinase; transferas | 0.542 | 0.69  | C0948008  | CDK5        | CDK5           | MTHFR                |
| Ischemic stroke | C0948008  | ADAMTS13   | 11093   | Q76LX8    | ADAM metaenzyme modulator;  | 0.536 | 0.69  | C0948008  | ADAMTS13    | ADAMTS13       | NOS2                 |
| Ischemic stroke | C0948008  | UCP2       | 7351    | P55851    | uncoupling protein 2        | 0.53  | 0.69  | C0948008  | UCP2        | UCP2           | NOTCH3               |
| Ischemic stroke | C0948008  | AQP4       | 361     | P55087    | aquaporir transporter       | 0.525 | 0.793 | C0948008  | AQP4        | AQP4           | PARP1                |
| Ischemic stroke | C0948008  | SELP       | 6403    | P16109    | selectin P                  | 0.519 | 0.724 | C0948008  | SELP        | SELP           | PLA2G7               |
| Ischemic stroke | C0948008  | HSPA1A     | 3303    | PODMV8;PC | heat shock protein family A | 0.516 | 0.793 | C0948008  | HSPA1A      | HSPA1A         | PLAT                 |
| Ischemic stroke | C0948008  | MMP12      | 4321    | P39900    | matrix mhydrolase; proteas  | 0.516 | 0.862 | C0948008  | MMP12       | MMP12          | S100B                |
| Ischemic stroke | C0948008  | PITX2      | 5308    | Q99697    | paired like homeodomain 2   | 0.51  | 0.724 | C0948008  | PITX2       | PITX2          | SELE                 |
| Ischemic stroke | C0948008  | ITGB3      | 3690    | P05106    | integrin cell adhesion mole | 0.507 | 0.69  | C0948008  | ITGB3       | ITGB3          | SERPINC1             |
| Ischemic stroke | C0948008  | THBD       | 7056    | P07204    | thrombomodulin              | 0.505 | 0.759 | C0948008  | THBD        | THBD           | SERPINE1             |
| Ischemic stroke | C0948008  | HDAC9      | 9734    | Q9UKV0    | histone deacetylase 9       | 0.501 | 0.759 | C0948008  | HDAC9       | HDAC9          | TNF                  |
| Ischemic stroke | C0948008  | ABO        | 28      | P16442    | ABO, alpttransferase        | 0.491 | 0.828 | C0948008  | ABO         | ABO            | VWF                  |
| Ischemic stroke | C0948008  | LPA        | 4018    | P08519    | lipoprotehydrolase; proteas | 0.489 | 0.655 | C0948008  | LPA         | LPA            | ABCC11               |
| Ischemic stroke | C0948008  | ALOX5      | 240     | P09917    | arachidor oxidoreductase    | 0.482 | 0.724 | C0948008  | ALOX5       | ALOX5          | ABO                  |

|                 |          |           |             |                               |       |                |           |
|-----------------|----------|-----------|-------------|-------------------------------|-------|----------------|-----------|
| Ischemic stroke | C0948008 | SELE      | 6401 P16581 | selectin E                    | 0.479 | 0.793 C0948008 | SELE      |
| Ischemic stroke | C0948008 | APOB      | 338 P04114  | apolipoprotein B              | 0.477 | 0.724 C0948008 | APOB      |
| Ischemic stroke | C0948008 | LDLR      | 3949 P01130 | low density lipoprotein rec   | 0.475 | 0.828 C0948008 | LDLR      |
| Ischemic stroke | C0948008 | AGER      | 177 Q15109  | advanced cell adhesion mole   | 0.472 | 0.724 C0948008 | AGER      |
| Ischemic stroke | C0948008 | ADM       | 133 P35318  | adrenomecsignaling molecule   | 0.471 | 0.724 C0948008 | ADM       |
| Ischemic stroke | C0948008 | EDNRA     | 1909 P25101 | endothelin receptor type A    | 0.469 | 0.828 C0948008 | EDNRA     |
| Ischemic stroke | C0948008 | FBN1      | 2200 P35555 | fibrillircalcium-binding pr   | 0.469 | 0.69 C0948008  | FBN1      |
| Ischemic stroke | C0948008 | NOTCH3    | 4854 Q9UM47 | notch 3                       | 0.469 | 0.69 C0948008  | NOTCH3    |
| Ischemic stroke | C0948008 | NPY       | 4852 P01303 | neuropeptsignaling molecule   | 0.469 | 0.69 C0948008  | NPY       |
| Ischemic stroke | C0948008 | F5        | 2153 P12259 | coagulaticeell adhesion mole  | 0.468 | 0.69 C0948008  | F5        |
| Ischemic stroke | C0948008 | TNFRSF11B | 4982 000300 | TNF receptor superfamily me   | 0.467 | 0.69 C0948008  | TNFRSF11B |
| Ischemic stroke | C0948008 | F2        | 2147 P00734 | coagulatihydrolase; proteas   | 0.466 | 0.793 C0948008 | F2        |
| Ischemic stroke | C0948008 | VCAM1     | 7412 P19320 | vascular cell adhesion mole   | 0.466 | 0.793 C0948008 | VCAM1     |
| Ischemic stroke | C0948008 | APOA1     | 335 P02647  | apolipoprotein A1             | 0.463 | 0.759 C0948008 | APOA1     |
| Ischemic stroke | C0948008 | VWF       | 7450 P04275 | von Willcenzyme modulator     | 0.462 | 0.724 C0948008 | VWF       |
| Ischemic stroke | C0948008 | EGR1      | 1958 P18146 | early grcnucleic acid bindi   | 0.459 | 0.793 C0948008 | EGR1      |
| Ischemic stroke | C0948008 | PLAT      | 5327 P00750 | plasminoghydrolase; proteas   | 0.459 | 0.828 C0948008 | PLAT      |
| Ischemic stroke | C0948008 | F3        | 2152 P13726 | coagulatidefense/immunity p   | 0.458 | 0.724 C0948008 | F3        |
| Ischemic stroke | C0948008 | AGTR1     | 185 P30556  | angiotensreceptor             | 0.454 | 0.759 C0948008 | AGTR1     |
| Ischemic stroke | C0948008 | CD40LG    | 959 P29965  | CD40 ligesignaling molecule   | 0.447 | 0.828 C0948008 | CD40LG    |
| Ischemic stroke | C0948008 | PON1      | 5444 P27169 | paraoxonase 1                 | 0.443 | 0.828 C0948008 | PON1      |
| Ischemic stroke | C0948008 | HSPA4     | 3308 P34932 | heat shock protein family A   | 0.441 | 0.793 C0948008 | HSPA4     |
| Ischemic stroke | C0948008 | MPO       | 4353 P05164 | myeloperoxidoreductase        | 0.435 | 0.931 C0948008 | MPO       |
| Ischemic stroke | C0948008 | PLAU      | 5328 P00749 | plasminoghydrolase; proteas   | 0.434 | 0.69 C0948008  | PLAU      |
| Ischemic stroke | C0948008 | HMGB1     | 3146 P09429 | high mobinucleic acid bindi   | 0.433 | 0.828 C0948008 | HMGB1     |
| Ischemic stroke | C0948008 | REN       | 5972 P00797 | renin hydrolase; proteas      | 0.423 | 0.759 C0948008 | REN       |
| Ischemic stroke | C0948008 | PLG       | 5340 P00747 | plasminoghydrolase; proteas   | 0.419 | 0.862 C0948008 | PLG       |
| Ischemic stroke | C0948008 | MMP1      | 4312 P03956 | matrix mehydrolase; proteas   | 0.415 | 0.793 C0948008 | MMP1      |
| Ischemic stroke | C0948008 | AGT       | 183 P01019  | angiotensenzyme modulator     | 0.406 | 0.862 C0948008 | AGT       |
| Ischemic stroke | C0948008 | FGF2      | 2247 P09038 | fibroblassignaling molecule   | 0.404 | 0.897 C0948008 | FGF2      |
| Ischemic stroke | C0948008 | IL18      | 3606 Q14116 | interleukin 18                | 0.404 | 0.862 C0948008 | IL18      |
| Ischemic stroke | C0948008 | HMOX1     | 3162 P09601 | heme oxygoxidoreductase       | 0.403 | 0.862 C0948008 | HMOX1     |
| Ischemic stroke | C0948008 | NOS3      | 4846 P29474 | nitric oxide synthase 3       | 0.401 | 0.862 C0948008 | NOS3      |
| Ischemic stroke | C0948008 | CRP       | 1401 P02741 | C-reactive protein            | 0.399 | 0.862 C0948008 | CRP       |
| Ischemic stroke | C0948008 | IL1RN     | 3557 P18510 | interleukin 1 receptor anta   | 0.398 | 0.897 C0948008 | IL1RN     |
| Ischemic stroke | C0948008 | IL17A     | 3605 Q16552 | interleukin 17A               | 0.391 | 0.862 C0948008 | IL17A     |
| Ischemic stroke | C0948008 | SPP1      | 6696 P10451 | secreted phosphoprotein 1     | 0.391 | 0.862 C0948008 | SPP1      |
| Ischemic stroke | C0948008 | MAPK1     | 5594 P28482 | mitogen-ek kinase; transferas | 0.387 | 0.862 C0948008 | MAPK1     |
| Ischemic stroke | C0948008 | ICAM1     | 3383 P05362 | intercellular adhesion mole   | 0.386 | 0.897 C0948008 | ICAM1     |
| Ischemic stroke | C0948008 | SERPINE1  | 5054 P05121 | serpin faenzyme modulator     | 0.384 | 0.793 C0948008 | SERPINE1  |
| Ischemic stroke | C0948008 | BDNF      | 627 P23560  | brain dersignaling molecule   | 0.382 | 0.828 C0948008 | BDNF      |
| Ischemic stroke | C0948008 | ACE       | 1636 P12821 | angiotenshydrolase; proteas   | 0.367 | 0.897 C0948008 | ACE       |
| Ischemic stroke | C0948008 | IL1A      | 3552 P01583 | interleukin 1 alpha           | 0.366 | 0.931 C0948008 | IL1A      |
| Ischemic stroke | C0948008 | TLR4      | 7099 000206 | toll like receptor 4          | 0.359 | 0.931 C0948008 | TLR4      |

|           |          |
|-----------|----------|
| SELE      | ACRDYS2  |
| APOB      | ACSL4    |
| LDLR      | ADAMTS1  |
| AGER      | ADAMTS13 |
| ADM       | ADAMTS18 |
| EDNRA     | ADCY10   |
| FBN1      | ADD3     |
| NOTCH3    | ADH1B    |
| NPY       | ADM      |
| F5        | AGER     |
| TNFRSF11B | AGT      |
| F2        | AGTR1    |
| VCAM1     | AGTR2    |
| APOA1     | AIF1     |
| VWF       | AKT1     |
| EGR1      | ALB      |
| PLAT      | ALOX5    |
| F3        | ANK2     |
| AGTR1     | APOB     |
| CD40LG    | APOBEC3G |
| PON1      | APOH     |
| HSPA4     | AQP4     |
| MPO       | ASAHI    |
| PLAU      | ASIC1    |
| HMGB1     | ATF3     |
| REN       | BBC3     |
| PLG       | BCL2     |
| MMP1      | BCO1     |
| AGT       | BLVRA    |
| FGF2      | BMP7     |
| IL18      | C3       |
| HMOX1     | CA1      |
| NOS3      | CA4      |
| CRP       | CADASIL  |
| IL1RN     | CASIL    |
| IL17A     | CASP9    |
| SPP1      | CASZ1    |
| MAPK1     | CAT      |
| ICAM1     | CCL11    |
| SERPINE1  | CCL3     |
| BDNF      | CCL4     |
| ACE       | CCL7     |
| IL1A      | CCR4     |
| TLR4      | CD40LG   |

|                 |          |       |      |        |                             |       |       |          |       |
|-----------------|----------|-------|------|--------|-----------------------------|-------|-------|----------|-------|
| Ischemic stroke | C0948008 | IGF1  | 3479 | P05019 | insulin like growth factor  | 0.355 | 0.828 | C0948008 | IGF1  |
| Ischemic stroke | C0948008 | MTHFR | 4524 | P42898 | methylenetetrahydrofolate r | 0.354 | 0.828 | C0948008 | MTHFR |
| Ischemic stroke | C0948008 | APOE  | 348  | P02649 | apolipoprotein E            | 0.352 | 0.931 | C0948008 | APOE  |
| Ischemic stroke | C0948008 | MMP9  | 4318 | P14780 | matrix mchydrolase; proteas | 0.339 | 0.862 | C0948008 | MMP9  |
| Ischemic stroke | C0948008 | PTGS2 | 5743 | P35354 | prostaglæoxidoreductase     | 0.338 | 0.897 | C0948008 | PTGS2 |
| Ischemic stroke | C0948008 | TGFB1 | 7040 | P01137 | transformsignaling molecule | 0.336 | 0.931 | C0948008 | TGFB1 |
| Ischemic stroke | C0948008 | IL1B  | 3553 | P01584 | interleukin 1 beta          | 0.312 | 0.931 | C0948008 | IL1B  |
| Ischemic stroke | C0948008 | VEGFA | 7422 | P15692 | vascular signaling molecule | 0.298 | 0.897 | C0948008 | VEGFA |
| Ischemic stroke | C0948008 | IL6   | 3569 | P05231 | interleukin 6               | 0.287 | 0.966 | C0948008 | IL6   |
| Ischemic stroke | C0948008 | TNF   | 7124 | P01375 | tumor necsignaling molecule | 0.263 | 0.966 | C0948008 | TNF   |
| Ischemic stroke | C0948008 | TP53  | 7157 | P04637 | tumor prctranscription fact | 0.251 | 0.897 | C0948008 | TP53  |

|       |            |
|-------|------------|
| IGF1  | CDK5       |
| MTHFR | CDK6       |
| APOE  | CDKN2B-AS1 |
| MMP9  | CEBPB      |
| PTGS2 | CHRM1      |
| TGFB1 | CKB        |
| IL1B  | CNOT3      |
| VEGFA | CNTF       |
| IL6   | COG2       |
| TNF   | CRP        |
| TP53  | CSF2       |
|       | CST3       |
|       | CTF1       |
|       | CXCL10     |
|       | CXCL2      |
|       | CXCR2      |
|       | CXCR3      |
|       | CYBB       |
|       | DCX        |
|       | DIABLO     |
|       | DPDE3      |
|       | DRD1       |
|       | DYNLL1     |
|       | EDNRA      |
|       | EGR1       |
|       | ENO2       |
|       | ENTPD1     |
|       | EPHA3      |
|       | EPHX2      |
|       | F10        |
|       | F12        |
|       | F3         |
|       | F7         |
|       | F8         |
|       | F9         |
|       | FAM107B    |
|       | FASLG      |
|       | FBN1       |
|       | FGB        |
|       | FGF2       |
|       | FGF21      |
|       | FLAP       |
|       | FOXF2      |
|       | GABRA6     |

|         |
|---------|
| GCKR    |
| GDNF    |
| GFAP    |
| GIPC1   |
| GJA1    |
| GP6     |
| GPR17   |
| GPX1    |
| GRIN1   |
| GRIN2A  |
| GRIN2B  |
| GSTP1   |
| HABP2   |
| HDAC9   |
| HIF1A   |
| HMGB1   |
| HMGCR   |
| HMOX1   |
| HP      |
| HSPA1A  |
| HSPA4   |
| HSPA8   |
| HSPD1   |
| HTR4    |
| HTRA2   |
| ICAM1   |
| IFNA2   |
| IFNG    |
| IGF1    |
| IL10RB  |
| IL11    |
| IL12RB1 |
| IL17A   |
| IL17RA  |
| IL18    |
| IL1A    |
| IL1RN   |
| IL22    |
| IL6     |
| IL6ST   |
| ILK     |
| IMF2    |
| IRAK1   |
| IRAK4   |

|          |
|----------|
| TRF1     |
| ITGAV    |
| ITGB3    |
| ITPR1    |
| ITPR2    |
| JUN      |
| JUNB     |
| KCNB1    |
| KCNK10   |
| KCNK2    |
| KCNK3    |
| KIAA1147 |
| KLKB1    |
| KMO      |
| KRT18    |
| KYNU     |
| LCN2     |
| LDLR     |
| LRCH1    |
| LSS      |
| MALAT1   |
| MAP2     |
| MAP2K1   |
| MAP3K5   |
| MAPK1    |
| MAPK3    |
| MBP      |
| MIAT     |
| MMP1     |
| MMP12    |
| MMP8     |
| MPO      |
| NRAS     |
| MROS     |
| MT2A     |
| MT-TL1   |
| MYLK     |
| NCAM1    |
| NDRG2    |
| NES      |
| NFE2L2   |
| NFKB1    |
| NFKB1A   |
| NGB      |

|          |
|----------|
| NGF      |
| NKX2-5   |
| NPY      |
| NT5C3A   |
| ODC1     |
| P2RY12   |
| PAOX     |
| PDE3A    |
| PDGFB    |
| PF4      |
| PGBD1    |
| PIK3CA   |
| PITX2    |
| PKCL     |
| PLAU     |
| PLD1     |
| PLG      |
| PODXL    |
| POMC     |
| PON1     |
| PON2     |
| PPBP     |
| PRKAA2   |
| PRKCL    |
| PROC     |
| PROZ     |
| PRPF8    |
| PTGIS    |
| PTGS2    |
| PTK2B    |
| PVALB    |
| RB1      |
| RELA     |
| REN      |
| RGS7     |
| RHNO1    |
| RNF213   |
| RPRGL1   |
| RPRGL2   |
| RTN4     |
| S100A5   |
| SDC1     |
| SELP     |
| SERPIND1 |



|           |
|-----------|
| SERPINF2  |
| SERPINH1  |
| SH2B3     |
| SH3PXD2A  |
| SIRT1     |
| SLC11A2   |
| SLC13A2   |
| SLC13A5   |
| SLC1A1    |
| SLC1A2    |
| SLC1A3    |
| SLC22A12  |
| SLC39A2   |
| SLC8A1    |
| SMOX      |
| SMYD3     |
| SOD1      |
| SOD2      |
| SPHK2     |
| SPP1      |
| SRPK2     |
| STAT3     |
| STRK1     |
| SULT1A3   |
| TAX1BP3   |
| TBX3      |
| TBXA2R    |
| TFPI      |
| TGFB1     |
| TH        |
| THBD      |
| THPH1     |
| THPH2     |
| TIMP1     |
| TLR4      |
| TNFAIP6   |
| TNFRSF11B |
| TNFRSF1A  |
| TNFRSF1B  |
| TNKS      |
| TP53      |
| TREM1     |
| TSPAN2    |
| TSPAN33   |

|         |
|---------|
| UCP2    |
| VCAM1   |
| VDR     |
| VEGFA   |
| VKORC1  |
| WNT2B   |
| XDH     |
| ZCCHC14 |
| ZFHX3   |

|                                             |            |                     |           |          |         |         |                   |              |          |       |           |          |
|---------------------------------------------|------------|---------------------|-----------|----------|---------|---------|-------------------|--------------|----------|-------|-----------|----------|
| Additional file5 Shared genes of AD with IS |            |                     |           |          |         |         |                   |              |          |       |           |          |
|                                             |            |                     |           |          |         |         |                   |              |          |       |           |          |
| Index_disease                               | Index_dise | Associated_disease  | Associate | Gene     | Gene_id | UniProt | Gene_Full         | Protein_cpLI | DSI_g    | DPI_g | diseaseic |          |
| Ischemic stroke                             | C0948008   | Alzheimer's Disease | C0002395  | NINJ2    | 4815    | Q9NZG7  | ninjurin          | cell adhe    | 0.001235 | 0.834 | 0.103     | C0948008 |
| Ischemic stroke                             | C0948008   | Alzheimer's Disease | C0002395  | HOMER2   | 9455    | Q9NSB8  | homer sca         | signaling    | 0.009315 | 0.773 | 0.276     | C0948008 |
| Ischemic stroke                             | C0948008   | Alzheimer's Disease | C0002395  | RCOR1    | 23186   | Q9UKL0  | REST corepressor  |              | 0.99993  | 0.762 | 0.414     | C0948008 |
| Ischemic stroke                             | C0948008   | Alzheimer's Disease | C0002395  | RNF146   | 81847   | Q9NTX7  | ring finger prote |              | 0.84761  | 0.735 | 0.276     | C0948008 |
| Ischemic stroke                             | C0948008   | Alzheimer's Disease | C0002395  | DHX40    | 79665   | Q8IX18  | DEAH-box          | nucleic a    | 0.74591  | 0.727 | 0.379     | C0948008 |
| Ischemic stroke                             | C0948008   | Alzheimer's Disease | C0002395  | KALRN    | 8997    | O60229  | kalirin           | signaling    | 1        | 0.72  | 0.207     | C0948008 |
| Ischemic stroke                             | C0948008   | Alzheimer's Disease | C0002395  | HOMER1   | 9456    | Q86YM7  | homer sca         | signaling    | 0.99937  | 0.69  | 0.241     | C0948008 |
| Ischemic stroke                             | C0948008   | Alzheimer's Disease | C0002395  | MADD     | 8567    | Q8WXG6  | MAP kinase activa |              | 1.20E-14 | 0.659 | 0.414     | C0948008 |
| Ischemic stroke                             | C0948008   | Alzheimer's Disease | C0002395  | ZFHX3    | 463     | Q15911  | zinc finger homeo |              | 1        | 0.656 | 0.517     | C0948008 |
| Ischemic stroke                             | C0948008   | Alzheimer's Disease | C0002395  | F11      | 2160    | P03951  | coagulat          | hydrolase    | 5.09E-26 | 0.656 | 0.414     | C0948008 |
| Ischemic stroke                             | C0948008   | Alzheimer's Disease | C0002395  | IRF9     | 10379   | Q00978  | interferon        | nucleic a    | 0.5924   | 0.656 | 0.552     | C0948008 |
| Ischemic stroke                             | C0948008   | Alzheimer's Disease | C0002395  | GRM2     | 2912    | Q14416  | glutamate         | receptor     | 0.1063   | 0.645 | 0.414     | C0948008 |
| Ischemic stroke                             | C0948008   | Alzheimer's Disease | C0002395  | CARD8    | 22900   | Q9Y2G2  | caspase recruitme |              | 1.73E-06 | 0.645 | 0.552     | C0948008 |
| Ischemic stroke                             | C0948008   | Alzheimer's Disease | C0002395  | P2RY1    | 5028    | P47900  | purinergic recept |              | 0.54087  | 0.642 | 0.586     | C0948008 |
| Ischemic stroke                             | C0948008   | Alzheimer's Disease | C0002395  | SERPINI1 | 5274    | Q99574  | serpin fa         | enzyme m     | 0.029902 | 0.642 | 0.31      | C0948008 |
| Ischemic stroke                             | C0948008   | Alzheimer's Disease | C0002395  | GRIA2    | 2891    | P42262  | glutamate ionotro |              | 0.99906  | 0.639 | 0.414     | C0948008 |
| Ischemic stroke                             | C0948008   | Alzheimer's Disease | C0002395  | SERPINE2 | 5270    | P07093  | serpin fa         | enzyme m     | 0.76421  | 0.639 | 0.517     | C0948008 |
| Ischemic stroke                             | C0948008   | Alzheimer's Disease | C0002395  | PTPRG    | 5793    | P23470  | protein           | hydrolase    | 2.20E-05 | 0.639 | 0.69      | C0948008 |
| Ischemic stroke                             | C0948008   | Alzheimer's Disease | C0002395  | CARTPT   | 9607    | Q16568  | CART prepropeptid |              | 0.10586  | 0.633 | 0.448     | C0948008 |
| Ischemic stroke                             | C0948008   | Alzheimer's Disease | C0002395  | GRIN1    | 2902    | Q05586  | glutamate ionotro |              | 0.98871  | 0.63  | 0.448     | C0948008 |
| Ischemic stroke                             | C0948008   | Alzheimer's Disease | C0002395  | PLK2     | 10769   | Q9NYY3  | polo like kinase  |              | 0.9999   | 0.621 | 0.586     | C0948008 |
| Ischemic stroke                             | C0948008   | Alzheimer's Disease | C0002395  | MUT      | 4594    | P22033  | methyln           | isomerase    | 3.25E-21 | 0.616 | 0.655     | C0948008 |
| Ischemic stroke                             | C0948008   | Alzheimer's Disease | C0002395  | APOA5    | 116519  | Q6Q788  | apolipoprotein A5 |              | 9.05E-10 | 0.609 | 0.483     | C0948008 |
| Ischemic stroke                             | C0948008   | Alzheimer's Disease | C0002395  | PTGER2   | 5732    | P43116  | prostagla         | receptor     | 0.041771 | 0.607 | 0.621     | C0948008 |
| Ischemic stroke                             | C0948008   | Alzheimer's Disease | C0002395  | F13A1    | 2162    | P00488  | coagulat          | transfera    | 2.50E-07 | 0.602 | 0.586     | C0948008 |
| Ischemic stroke                             | C0948008   | Alzheimer's Disease | C0002395  | CRTC1    | 23373   | Q6UUV9  | CREB regu         | transcrip    | 0.42733  | 0.602 | 0.621     | C0948008 |
| Ischemic stroke                             | C0948008   | Alzheimer's Disease | C0002395  | MIR424   | 494336  |         | microRNA 424      |              |          | 0.6   | 0.552     | C0948008 |
| Ischemic stroke                             | C0948008   | Alzheimer's Disease | C0002395  | SRF      | 6722    | P11831  | serum res         | transcrip    | 0.97512  | 0.598 | 0.69      | C0948008 |
| Ischemic stroke                             | C0948008   | Alzheimer's Disease | C0002395  | ALOX12   | 239     | P18054  | arachido          | oxidoredu    | 6.61E-16 | 0.596 | 0.621     | C0948008 |
| Ischemic stroke                             | C0948008   | Alzheimer's Disease | C0002395  | PON2     | 5445    | Q15165  | paraoxonase 2     |              | 6.06E-05 | 0.596 | 0.621     | C0948008 |
| Ischemic stroke                             | C0948008   | Alzheimer's Disease | C0002395  | PADI4    | 23569   | Q9UM07  | peptidyl arginine |              | 2.59E-16 | 0.592 | 0.586     | C0948008 |
| Ischemic stroke                             | C0948008   | Alzheimer's Disease | C0002395  | OLR1     | 4973    | P78380  | oxidized low dens |              | 0.008896 | 0.59  | 0.552     | C0948008 |

|                 |          |                     |          |            |          |        |                            |          |       |       |          |
|-----------------|----------|---------------------|----------|------------|----------|--------|----------------------------|----------|-------|-------|----------|
| Ischemic stroke | C0948008 | Alzheimer's Disease | C0002395 | LRP6       | 4040     | O75581 | LDL receptor rela          | 0.98369  | 0.588 | 0.724 | C0948008 |
| Ischemic stroke | C0948008 | Alzheimer's Disease | C0002395 | CCL11      | 6356     | P51671 | C-C motif signaling        | 0.009816 | 0.586 | 0.655 | C0948008 |
| Ischemic stroke | C0948008 | Alzheimer's Disease | C0002395 | MIR107     | 406901   |        | microRNA 107               |          | 0.586 | 0.621 | C0948008 |
| Ischemic stroke | C0948008 | Alzheimer's Disease | C0002395 | FOLH1      | 2346     | Q04609 | folate h hydrolase         | 2.27E-08 | 0.584 | 0.724 | C0948008 |
| Ischemic stroke | C0948008 | Alzheimer's Disease | C0002395 | REST       | 5978     | Q13127 | RE1 site transcrip         | 0.99393  | 0.584 | 0.517 | C0948008 |
| Ischemic stroke | C0948008 | Alzheimer's Disease | C0002395 | PLA2G7     | 7941     | Q13093 | phosphol hydrolase         | 8.88E-22 | 0.584 | 0.552 | C0948008 |
| Ischemic stroke | C0948008 | Alzheimer's Disease | C0002395 | DVL1       | 1855     | O14640 | dishevel enzyme m          | 1.82E-05 | 0.582 | 0.655 | C0948008 |
| Ischemic stroke | C0948008 | Alzheimer's Disease | C0002395 | AHSG       | 197      | P02765 | alpha 2-enzyme m           | 2.72E-10 | 0.577 | 0.69  | C0948008 |
| Ischemic stroke | C0948008 | Alzheimer's Disease | C0002395 | PINK1      | 65018    | Q9BXM7 | PTEN indu kinase; r        | 1.03E-10 | 0.577 | 0.586 | C0948008 |
| Ischemic stroke | C0948008 | Alzheimer's Disease | C0002395 | SERPINA3   | 12       | P01011 | serpin faenzyme m          | 8.07E-14 | 0.572 | 0.69  | C0948008 |
| Ischemic stroke | C0948008 | Alzheimer's Disease | C0002395 | CYP11B2    | 1585     | P19099 | cytochrome P450 f          | 9.54E-19 | 0.572 | 0.483 | C0948008 |
| Ischemic stroke | C0948008 | Alzheimer's Disease | C0002395 | SLC1A2     | 6506     | P43004 | solute ca transport        | 0.61687  | 0.572 | 0.517 | C0948008 |
| Ischemic stroke | C0948008 | Alzheimer's Disease | C0002395 | TREM2      | 54209    | Q9NZC2 | triggering recept          | 4.00E-09 | 0.572 | 0.552 | C0948008 |
| Ischemic stroke | C0948008 | Alzheimer's Disease | C0002395 | PGR-AS1    | 1.01E+08 |        | PGR antisense RNA 1        |          | 0.57  | 0.586 | C0948008 |
| Ischemic stroke | C0948008 | Alzheimer's Disease | C0002395 | BRS3       | 680      | P32247 | bombesin receptor          | 0.90963  | 0.569 | 0.69  | C0948008 |
| Ischemic stroke | C0948008 | Alzheimer's Disease | C0002395 | MIR132     | 406921   |        | microRNA 132               |          | 0.569 | 0.759 | C0948008 |
| Ischemic stroke | C0948008 | Alzheimer's Disease | C0002395 | PC         | 5091     | P11498 | pyruvate ligase            | 0.007175 | 0.565 | 0.724 | C0948008 |
| Ischemic stroke | C0948008 | Alzheimer's Disease | C0002395 | A2M        | 2        | P01023 | alpha-2-defensin/          | 5.61E-11 | 0.564 | 0.724 | C0948008 |
| Ischemic stroke | C0948008 | Alzheimer's Disease | C0002395 | PTGES      | 9536     | O14684 | prostaglandin E s          | 0.65991  | 0.562 | 0.69  | C0948008 |
| Ischemic stroke | C0948008 | Alzheimer's Disease | C0002395 | MIR29B1    | 407024   |        | microRNA 29b-1             |          | 0.558 | 0.69  | C0948008 |
| Ischemic stroke | C0948008 | Alzheimer's Disease | C0002395 | C20orf181  | 1E+08    |        | chromosome 20 open reading |          | 0.557 | 0.69  | C0948008 |
| Ischemic stroke | C0948008 | Alzheimer's Disease | C0002395 | CETP       | 1071     | P11597 | cholesteryl ester          | 1.03E-23 | 0.555 | 0.655 | C0948008 |
| Ischemic stroke | C0948008 | Alzheimer's Disease | C0002395 | SERPINC1   | 462      | P01008 | serpin faenzyme m          | 0.99863  | 0.554 | 0.621 | C0948008 |
| Ischemic stroke | C0948008 | Alzheimer's Disease | C0002395 | MOK        | 5891     | Q9UQ07 | MOK prote kinase; r        | 9.92E-22 | 0.554 | 0.655 | C0948008 |
| Ischemic stroke | C0948008 | Alzheimer's Disease | C0002395 | MIR29B2    | 407025   |        | microRNA 29b-2             |          | 0.554 | 0.724 | C0948008 |
| Ischemic stroke | C0948008 | Alzheimer's Disease | C0002395 | SLC33A1    | 9197     | O00400 | solute ca transport        | 9.14E-05 | 0.551 | 0.655 | C0948008 |
| Ischemic stroke | C0948008 | Alzheimer's Disease | C0002395 | FLG        | 2312     | P20930 | filaggrin                  | 0.000312 | 0.55  | 0.655 | C0948008 |
| Ischemic stroke | C0948008 | Alzheimer's Disease | C0002395 | CDKN2B-AS1 | 1E+08    |        | CDKN2B antisense RNA 1     |          | 0.55  | 0.586 | C0948008 |
| Ischemic stroke | C0948008 | Alzheimer's Disease | C0002395 | F7         | 2155     | P08709 | coagulat hydrolase         | 1.53E-05 | 0.547 | 0.69  | C0948008 |
| Ischemic stroke | C0948008 | Alzheimer's Disease | C0002395 | NPPA       | 4878     | P01160 | natriuretic pepti          | 0.000639 | 0.546 | 0.69  | C0948008 |
| Ischemic stroke | C0948008 | Alzheimer's Disease | C0002395 | TFPI2      | 7980     | P48307 | tissue faenzyme m          | 0.00078  | 0.545 | 0.621 | C0948008 |
| Ischemic stroke | C0948008 | Alzheimer's Disease | C0002395 | NR4A3      | 8013     | Q92570 | nuclear r receptor         | 0.89536  | 0.545 | 0.759 | C0948008 |
| Ischemic stroke | C0948008 | Alzheimer's Disease | C0002395 | CDK5       | 1020     | Q00535 | cyclin d kinase; r         | 0.095196 | 0.542 | 0.69  | C0948008 |
| Ischemic stroke | C0948008 | Alzheimer's Disease | C0002395 | CYP2C9     | 1559     | P11712 | cytochrome P450 f          | 1.80E-10 | 0.542 | 0.759 | C0948008 |
| Ischemic stroke | C0948008 | Alzheimer's Disease | C0002395 | PPIG       | 9360     | Q13427 | peptidylprolyl is          | 0.9649   | 0.537 | 0.793 | C0948008 |
| Ischemic stroke | C0948008 | Alzheimer's Disease | C0002395 | PIN1       | 5300     | Q13526 | peptidylprolyl ci          | 0.76129  | 0.536 | 0.655 | C0948008 |

|                 |          |                     |          |         |      |               |                                               |          |       |       |          |
|-----------------|----------|---------------------|----------|---------|------|---------------|-----------------------------------------------|----------|-------|-------|----------|
| Ischemic stroke | C0948008 | Alzheimer's Disease | C0002395 | GNB3    | 2784 | P16520        | G protein-coupled                             | 2.92E-11 | 0.533 | 0.724 | C0948008 |
| Ischemic stroke | C0948008 | Alzheimer's Disease | C0002395 | LRP1    | 4035 | Q07954        | LDL receptor-related                          | 1        | 0.533 | 0.724 | C0948008 |
| Ischemic stroke | C0948008 | Alzheimer's Disease | C0002395 | IL9     | 3578 | P15248        | interleukin 9                                 | 9.62E-07 | 0.53  | 0.69  | C0948008 |
| Ischemic stroke | C0948008 | Alzheimer's Disease | C0002395 | LIF     | 3976 | P15018        | LIF, interleukin-6 receptor                   | 0.50007  | 0.528 | 0.655 | C0948008 |
| Ischemic stroke | C0948008 | Alzheimer's Disease | C0002395 | MSC     | 9242 | O60682        | muscle myosin heavy chain IIA                 | 0.022585 | 0.526 | 0.655 | C0948008 |
| Ischemic stroke | C0948008 | Alzheimer's Disease | C0002395 | AQP4    | 361  | P55087        | aquaporin-4                                   | 0.002775 | 0.525 | 0.793 | C0948008 |
| Ischemic stroke | C0948008 | Alzheimer's Disease | C0002395 | KCNQ1   | 3784 | P51787        | potassium voltage-gated channel subunit       | 2.07E-07 | 0.525 | 0.586 | C0948008 |
| Ischemic stroke | C0948008 | Alzheimer's Disease | C0002395 | NTF3    | 4908 | P20783        | neurotrophin-3                                | 0.88635  | 0.525 | 0.621 | C0948008 |
| Ischemic stroke | C0948008 | Alzheimer's Disease | C0002395 | NR3C2   | 4306 | P08235        | nuclear receptor subfamily 3 group C member 2 | 0.80843  | 0.52  | 0.69  | C0948008 |
| Ischemic stroke | C0948008 | Alzheimer's Disease | C0002395 | HSPA1A  | 3303 | P0DMV8;P0DMV9 | heat shock protein 70 kDa class B member 1A   | 0.029335 | 0.516 | 0.793 | C0948008 |
| Ischemic stroke | C0948008 | Alzheimer's Disease | C0002395 | HSPA1B  | 3304 | P0DMV8;P0DMV9 | heat shock protein 70 kDa class B member 1B   | 0.005091 | 0.514 | 0.793 | C0948008 |
| Ischemic stroke | C0948008 | Alzheimer's Disease | C0002395 | EEF1A2  | 1917 | Q05639        | eukaryotic translation initiation factor 1A2  | 0.99606  | 0.51  | 0.69  | C0948008 |
| Ischemic stroke | C0948008 | Alzheimer's Disease | C0002395 | MTRR    | 4552 | Q9UBK8        | 5-methyltetrahydrofolate methyltransferase    | 1.77E-14 | 0.51  | 0.655 | C0948008 |
| Ischemic stroke | C0948008 | Alzheimer's Disease | C0002395 | PLA2G2A | 5320 | P14555        | phospholipase A2 group 2A                     | 0.10723  | 0.509 | 0.69  | C0948008 |
| Ischemic stroke | C0948008 | Alzheimer's Disease | C0002395 | ITGB3   | 3690 | P05106        | integrin $\beta$ 3                            | 0.002193 | 0.507 | 0.69  | C0948008 |
| Ischemic stroke | C0948008 | Alzheimer's Disease | C0002395 | NRG1    | 3084 | Q02297        | neuregulin-1                                  | 0.99553  | 0.506 | 0.759 | C0948008 |
| Ischemic stroke | C0948008 | Alzheimer's Disease | C0002395 | LPL     | 4023 | P06858        | lipoprotein lipase                            | 7.23E-10 | 0.504 | 0.724 | C0948008 |
| Ischemic stroke | C0948008 | Alzheimer's Disease | C0002395 | P2RX7   | 5027 | Q99572        | purinergic receptor P2X7                      | 3.05E-11 | 0.503 | 0.759 | C0948008 |
| Ischemic stroke | C0948008 | Alzheimer's Disease | C0002395 | CHI3L1  | 1116 | P36222        | chitinase 3 like 1                            | 8.51E-06 | 0.502 | 0.793 | C0948008 |
| Ischemic stroke | C0948008 | Alzheimer's Disease | C0002395 | PLA2G1B | 5319 | P04054        | phospholipase A2 group 1B                     | 1.09E-10 | 0.502 | 0.793 | C0948008 |
| Ischemic stroke | C0948008 | Alzheimer's Disease | C0002395 | CYP2C19 | 1557 | P33261        | cytochrome P450 2C19                          | 4.11E-20 | 0.501 | 0.793 | C0948008 |
| Ischemic stroke | C0948008 | Alzheimer's Disease | C0002395 | HDAC9   | 9734 | Q9UKV0        | histone deacetylase 9                         | 0.99996  | 0.501 | 0.759 | C0948008 |
| Ischemic stroke | C0948008 | Alzheimer's Disease | C0002395 | GDF15   | 9518 | Q99988        | growth differentiation factor 15              | 2.85E-07 | 0.496 | 0.621 | C0948008 |
| Ischemic stroke | C0948008 | Alzheimer's Disease | C0002395 | PTGS1   | 5742 | P23219        | prostaglandin synthase                        | 2.65E-06 | 0.495 | 0.828 | C0948008 |
| Ischemic stroke | C0948008 | Alzheimer's Disease | C0002395 | PLA2G6  | 8398 | O60733        | phospholipase A2 group 6                      | 2.79E-10 | 0.494 | 0.724 | C0948008 |
| Ischemic stroke | C0948008 | Alzheimer's Disease | C0002395 | MTR     | 4548 | Q99707        | 5-methyltetrahydrofolate methyltransferase    | 2.65E-10 | 0.493 | 0.724 | C0948008 |
| Ischemic stroke | C0948008 | Alzheimer's Disease | C0002395 | PECAM1  | 5175 | P16284        | platelet endothelial cell adhesion molecule-1 |          | 0.492 | 0.69  | C0948008 |
| Ischemic stroke | C0948008 | Alzheimer's Disease | C0002395 | ABO     | 28   | P16442        | ABO, alpha                                    |          | 0.491 | 0.828 | C0948008 |
| Ischemic stroke | C0948008 | Alzheimer's Disease | C0002395 | LPA     | 4018 | P08519        | lipoprotein lipase                            | 5.81E-88 | 0.489 | 0.655 | C0948008 |
| Ischemic stroke | C0948008 | Alzheimer's Disease | C0002395 | AVP     | 551  | P01185        | arginine vasopressin                          | 0.075195 | 0.486 | 0.759 | C0948008 |
| Ischemic stroke | C0948008 | Alzheimer's Disease | C0002395 | ABCA1   | 19   | O95477        | ATP-binding cassette transporter 1            | 3.53E-12 | 0.484 | 0.793 | C0948008 |
| Ischemic stroke | C0948008 | Alzheimer's Disease | C0002395 | ALOX5   | 240  | P09917        | arachidonate 5-lipoxygenase                   | 1.50E-06 | 0.482 | 0.724 | C0948008 |
| Ischemic stroke | C0948008 | Alzheimer's Disease | C0002395 | KCNA3   | 3738 | P22001        | potassium voltage-gated channel subunit A3    | 0.86034  | 0.481 | 0.724 | C0948008 |
| Ischemic stroke | C0948008 | Alzheimer's Disease | C0002395 | ADRB2   | 154  | P07550        | adrenoreceptor $\beta$ 2                      | 0.58042  | 0.479 | 0.793 | C0948008 |
| Ischemic stroke | C0948008 | Alzheimer's Disease | C0002395 | ANGPT2  | 285  | O15123        | angiopoietin-2                                | 0.85572  | 0.479 | 0.724 | C0948008 |
| Ischemic stroke | C0948008 | Alzheimer's Disease | C0002395 | BIRC5   | 332  | O15392        | baculovirion inhibitor 5                      | 0.056738 | 0.479 | 0.655 | C0948008 |

|                 |          |                     |          |         |        |          |                     |          |       |       |          |
|-----------------|----------|---------------------|----------|---------|--------|----------|---------------------|----------|-------|-------|----------|
| Ischemic stroke | C0948008 | Alzheimer's Disease | C0002395 | F2R     | 2149   | P25116   | coagulation facto   | 0.00577  | 0.478 | 0.759 | C0948008 |
| Ischemic stroke | C0948008 | Alzheimer's Disease | C0002395 | CFH     | 3075   | P08603   | complement factor   | 0.96239  | 0.478 | 0.793 | C0948008 |
| Ischemic stroke | C0948008 | Alzheimer's Disease | C0002395 | APOB    | 338    | P04114   | apolipoprotein B    | 1.64E-16 | 0.477 | 0.724 | C0948008 |
| Ischemic stroke | C0948008 | Alzheimer's Disease | C0002395 | OGG1    | 4968   | O15527   | 8-oxoguanine DNA    | 2.14E-12 | 0.476 | 0.759 | C0948008 |
| Ischemic stroke | C0948008 | Alzheimer's Disease | C0002395 | LDLR    | 3949   | P01130   | low density lipop   | 9.44E-24 | 0.475 | 0.828 | C0948008 |
| Ischemic stroke | C0948008 | Alzheimer's Disease | C0002395 | PRNP    | 5621   | F7VJQ1;P | prion protein       | 0.000715 | 0.474 | 0.897 | C0948008 |
| Ischemic stroke | C0948008 | Alzheimer's Disease | C0002395 | AGER    | 177    | Q15109   | advanced cell adhe  | 3.44E-16 | 0.472 | 0.724 | C0948008 |
| Ischemic stroke | C0948008 | Alzheimer's Disease | C0002395 | ADM     | 133    | P35318   | adrenomed signaling | 0.034615 | 0.471 | 0.724 | C0948008 |
| Ischemic stroke | C0948008 | Alzheimer's Disease | C0002395 | NPY     | 4852   | P01303   | neuropep signaling  | 0.15508  | 0.469 | 0.69  | C0948008 |
| Ischemic stroke | C0948008 | Alzheimer's Disease | C0002395 | NOTCH3  | 4854   | Q9UM47   | notch 3             | 0.86965  | 0.469 | 0.69  | C0948008 |
| Ischemic stroke | C0948008 | Alzheimer's Disease | C0002395 | SEMA6A  | 57556  | Q9H2E6   | semaphor signaling  | 0.99993  | 0.468 | 0.793 | C0948008 |
| Ischemic stroke | C0948008 | Alzheimer's Disease | C0002395 | NQO1    | 1728   | P15559   | NAD(P)H quinone d   | 1.02E-09 | 0.467 | 0.724 | C0948008 |
| Ischemic stroke | C0948008 | Alzheimer's Disease | C0002395 | TIMP2   | 7077   | P16035   | TIMP metaenzyme m   | 0.80818  | 0.467 | 0.759 | C0948008 |
| Ischemic stroke | C0948008 | Alzheimer's Disease | C0002395 | F2      | 2147   | P00734   | coagulat hydrolase  | 0.001125 | 0.466 | 0.793 | C0948008 |
| Ischemic stroke | C0948008 | Alzheimer's Disease | C0002395 | IFNB1   | 3456   | P01574   | interferon beta 1   |          | 0.466 | 0.793 | C0948008 |
| Ischemic stroke | C0948008 | Alzheimer's Disease | C0002395 | VCAM1   | 7412   | P19320   | vascular cell adh   | 0.74466  | 0.466 | 0.793 | C0948008 |
| Ischemic stroke | C0948008 | Alzheimer's Disease | C0002395 | PPARA   | 5465   | Q07869   | peroxisom nucleic a | 0.037307 | 0.465 | 0.793 | C0948008 |
| Ischemic stroke | C0948008 | Alzheimer's Disease | C0002395 | APOA1   | 335    | P02647   | apolipoprotein A1   | 0.000549 | 0.463 | 0.759 | C0948008 |
| Ischemic stroke | C0948008 | Alzheimer's Disease | C0002395 | VWF     | 7450   | P04275   | von Wille enzyme m  | 7.85E-24 | 0.462 | 0.724 | C0948008 |
| Ischemic stroke | C0948008 | Alzheimer's Disease | C0002395 | COX8A   | 1351   | P10176   | cytochrom oxidoredu | 0.10544  | 0.461 | 0.793 | C0948008 |
| Ischemic stroke | C0948008 | Alzheimer's Disease | C0002395 | EGR1    | 1958   | P18146   | early gro nucleic a | 0.3269   | 0.459 | 0.793 | C0948008 |
| Ischemic stroke | C0948008 | Alzheimer's Disease | C0002395 | PLAT    | 5327   | P00750   | plasmino hydrolase  | 3.46E-05 | 0.459 | 0.828 | C0948008 |
| Ischemic stroke | C0948008 | Alzheimer's Disease | C0002395 | AGTR1   | 185    | P30556   | angiotens receptor  | 0.000572 | 0.454 | 0.759 | C0948008 |
| Ischemic stroke | C0948008 | Alzheimer's Disease | C0002395 | MIR146A | 406938 |          | microRNA 146a       |          | 0.452 | 0.759 | C0948008 |
| Ischemic stroke | C0948008 | Alzheimer's Disease | C0002395 | XRCC1   | 7515   | P18887   | X-ray repair cros   | 4.76E-09 | 0.449 | 0.828 | C0948008 |
| Ischemic stroke | C0948008 | Alzheimer's Disease | C0002395 | ABCG2   | 9429   | Q9UNQ0   | ATP bind transport  | 1.26E-32 | 0.449 | 0.793 | C0948008 |
| Ischemic stroke | C0948008 | Alzheimer's Disease | C0002395 | CD40LG  | 959    | P29965   | CD40 lig signaling  | 0.72669  | 0.447 | 0.828 | C0948008 |
| Ischemic stroke | C0948008 | Alzheimer's Disease | C0002395 | ESR2    | 2100   | Q92731   | estrogen nucleic a  | 5.39E-08 | 0.445 | 0.828 | C0948008 |
| Ischemic stroke | C0948008 | Alzheimer's Disease | C0002395 | PON1    | 5444   | P27169   | paraoxonase 1       | 8.98E-11 | 0.443 | 0.828 | C0948008 |
| Ischemic stroke | C0948008 | Alzheimer's Disease | C0002395 | HSPA4   | 3308   | P34932   | heat shock protei   | 0.9999   | 0.441 | 0.793 | C0948008 |
| Ischemic stroke | C0948008 | Alzheimer's Disease | C0002395 | HFE     | 3077   | Q30201   | homeostatic iron    | 3.01E-08 | 0.44  | 0.69  | C0948008 |
| Ischemic stroke | C0948008 | Alzheimer's Disease | C0002395 | MMP3    | 4314   | P08254   | matrix m hydrolase  | 4.93E-15 | 0.439 | 0.793 | C0948008 |
| Ischemic stroke | C0948008 | Alzheimer's Disease | C0002395 | CYP2B6  | 1555   | P20813   | cytochrome P450 f   | 3.50E-10 | 0.437 | 0.828 | C0948008 |
| Ischemic stroke | C0948008 | Alzheimer's Disease | C0002395 | MPO     | 4353   | P05164   | myelopero oxidoredu | 6.82E-15 | 0.435 | 0.931 | C0948008 |
| Ischemic stroke | C0948008 | Alzheimer's Disease | C0002395 | PLAU    | 5328   | P00749   | plasmino hydrolase  | 2.14E-06 | 0.434 | 0.69  | C0948008 |
| Ischemic stroke | C0948008 | Alzheimer's Disease | C0002395 | CD40    | 958    | P25942   | CD40 molecule       | 0.85939  | 0.433 | 0.862 | C0948008 |

|                 |          |                     |          |          |      |        |                                                  |                      |          |          |          |          |
|-----------------|----------|---------------------|----------|----------|------|--------|--------------------------------------------------|----------------------|----------|----------|----------|----------|
| Ischemic stroke | C0948008 | Alzheimer's Disease | C0002395 | HMGB1    | 3146 | P09429 | high mobility group                              | nucleic acid binding | 0.83018  | 0.433    | 0.828    | C0948008 |
| Ischemic stroke | C0948008 | Alzheimer's Disease | C0002395 | IGF1R    | 3480 | P08069 | insulin like growth factor                       | 0.98751              | 0.433    | 0.828    | C0948008 |          |
| Ischemic stroke | C0948008 | Alzheimer's Disease | C0002395 | BRCA2    | 675  | P51587 | BRCA2, DNA binding                               | nucleic acid binding | 5.46E-24 | 0.426    | 0.793    | C0948008 |
| Ischemic stroke | C0948008 | Alzheimer's Disease | C0002395 | COMT     | 1312 | P21964 | catechol O-methyltransferase                     | 1.27E-05             | 0.426    | 0.897    | C0948008 |          |
| Ischemic stroke | C0948008 | Alzheimer's Disease | C0002395 | EPHB2    | 2048 | P29323 | EPH receptor B2                                  | 0.99999              | 0.425    | 0.759    | C0948008 |          |
| Ischemic stroke | C0948008 | Alzheimer's Disease | C0002395 | EPO      | 2056 | P01588 | erythropoietin                                   | 0.012147             | 0.425    | 0.759    | C0948008 |          |
| Ischemic stroke | C0948008 | Alzheimer's Disease | C0002395 | REN      | 5972 | P00797 | renin                                            | hydrolase            | 2.12E-07 | 0.423    | 0.759    | C0948008 |
| Ischemic stroke | C0948008 | Alzheimer's Disease | C0002395 | CSF3     | 1440 | P09919 | colony stimulating factor 3                      | 0.32663              | 0.421    | 0.828    | C0948008 |          |
| Ischemic stroke | C0948008 | Alzheimer's Disease | C0002395 | EZH2     | 2146 | Q15910 | enhancer of zeste 2                              | 1                    | 0.421    | 0.759    | C0948008 |          |
| Ischemic stroke | C0948008 | Alzheimer's Disease | C0002395 | PLG      | 5340 | P00747 | plasminogen                                      | hydrolase            | 0.009642 | 0.419    | 0.862    | C0948008 |
| Ischemic stroke | C0948008 | Alzheimer's Disease | C0002395 | MMP1     | 4312 | P03956 | matrix metalloproteinase 1                       | hydrolase            | 6.24E-18 | 0.415    | 0.793    | C0948008 |
| Ischemic stroke | C0948008 | Alzheimer's Disease | C0002395 | NOTCH1   | 4851 | P46531 | notch 1                                          | 1                    | 0.415    | 0.759    | C0948008 |          |
| Ischemic stroke | C0948008 | Alzheimer's Disease | C0002395 | AGT      | 183  | P01019 | angiotensinogenase                               | enzyme               | 3.87E-08 | 0.406    | 0.862    | C0948008 |
| Ischemic stroke | C0948008 | Alzheimer's Disease | C0002395 | FGF2     | 2247 | P09038 | fibroblast growth factor 2                       | signaling            | 0.019149 | 0.404    | 0.897    | C0948008 |
| Ischemic stroke | C0948008 | Alzheimer's Disease | C0002395 | IL18     | 3606 | Q14116 | interleukin 18                                   | 0.029184             | 0.404    | 0.862    | C0948008 |          |
| Ischemic stroke | C0948008 | Alzheimer's Disease | C0002395 | HMOX1    | 3162 | P09601 | heme oxygenase 1                                 | oxidoreductase       | 0.007886 | 0.403    | 0.862    | C0948008 |
| Ischemic stroke | C0948008 | Alzheimer's Disease | C0002395 | ATM      | 472  | Q13315 | ATM serine/threonine kinase                      | 5.98E-46             | 0.401    | 0.862    | C0948008 |          |
| Ischemic stroke | C0948008 | Alzheimer's Disease | C0002395 | NOS3     | 4846 | P29474 | nitric oxide synthase 3                          | 8.89E-07             | 0.401    | 0.862    | C0948008 |          |
| Ischemic stroke | C0948008 | Alzheimer's Disease | C0002395 | CRP      | 1401 | P02741 | C-reactive protein                               | 0.003736             | 0.399    | 0.862    | C0948008 |          |
| Ischemic stroke | C0948008 | Alzheimer's Disease | C0002395 | IL1RN    | 3557 | P18510 | interleukin 1 receptor antagonist                | 0.033509             | 0.398    | 0.897    | C0948008 |          |
| Ischemic stroke | C0948008 | Alzheimer's Disease | C0002395 | COX2     | 4513 | P00403 | cytochrome c oxidoreductase                      | 0.397                | 0.862    | C0948008 |          |          |
| Ischemic stroke | C0948008 | Alzheimer's Disease | C0002395 | IL17A    | 3605 | Q16552 | interleukin 17A                                  | 0.044037             | 0.391    | 0.862    | C0948008 |          |
| Ischemic stroke | C0948008 | Alzheimer's Disease | C0002395 | PPARG    | 5468 | P37231 | peroxisome proliferator-activated receptor gamma | nucleic acid binding | 0.1447   | 0.388    | 0.828    | C0948008 |
| Ischemic stroke | C0948008 | Alzheimer's Disease | C0002395 | MAPK1    | 5594 | P28482 | mitogen-activated protein kinase 1               | 0.9973               | 0.387    | 0.862    | C0948008 |          |
| Ischemic stroke | C0948008 | Alzheimer's Disease | C0002395 | ICAM1    | 3383 | P05362 | intercellular adhesion molecule 1                | 0.038102             | 0.386    | 0.897    | C0948008 |          |
| Ischemic stroke | C0948008 | Alzheimer's Disease | C0002395 | SERPINE1 | 5054 | P05121 | serpin family 1 member 1                         | enzyme               | 0.047491 | 0.384    | 0.793    | C0948008 |
| Ischemic stroke | C0948008 | Alzheimer's Disease | C0002395 | BDNF     | 627  | P23560 | brain derived neurotrophic factor                | signaling            | 0.69969  | 0.382    | 0.828    | C0948008 |
| Ischemic stroke | C0948008 | Alzheimer's Disease | C0002395 | AR       | 367  | P10275 | androgen receptor                                | nucleic acid binding | 0.98299  | 0.38     | 0.793    | C0948008 |
| Ischemic stroke | C0948008 | Alzheimer's Disease | C0002395 | MMP2     | 4313 | P08253 | matrix metalloproteinase 2                       | hydrolase            | 0.83952  | 0.373    | 0.862    | C0948008 |
| Ischemic stroke | C0948008 | Alzheimer's Disease | C0002395 | ABCB1    | 5243 | P08183 | ATP binding cassette transporter 1               | hydrolase            | 1.31E-05 | 0.371    | 0.828    | C0948008 |
| Ischemic stroke | C0948008 | Alzheimer's Disease | C0002395 | ACE      | 1636 | P12821 | angiotensin converting enzyme                    | hydrolase            | 1.55E-37 | 0.367    | 0.897    | C0948008 |
| Ischemic stroke | C0948008 | Alzheimer's Disease | C0002395 | IL1A     | 3552 | P01583 | interleukin 1 alpha                              | 0.000149             | 0.366    | 0.931    | C0948008 |          |
| Ischemic stroke | C0948008 | Alzheimer's Disease | C0002395 | IL4      | 3565 | P05112 | interleukin 4                                    | 0.005296             | 0.364    | 0.931    | C0948008 |          |
| Ischemic stroke | C0948008 | Alzheimer's Disease | C0002395 | TLR4     | 7099 | O00206 | toll like receptor 4                             | 5.58E-09             | 0.359    | 0.931    | C0948008 |          |
| Ischemic stroke | C0948008 | Alzheimer's Disease | C0002395 | ESR1     | 2099 | P03372 | estrogen receptor                                | nucleic acid binding | 0.9994   | 0.355    | 0.897    | C0948008 |
| Ischemic stroke | C0948008 | Alzheimer's Disease | C0002395 | IGF1     | 3479 | P05019 | insulin like growth factor 1                     | 0.28843              | 0.355    | 0.828    | C0948008 |          |

|                 |          |                     |          |        |      |           |                        |          |       |          |          |
|-----------------|----------|---------------------|----------|--------|------|-----------|------------------------|----------|-------|----------|----------|
| Ischemic stroke | C0948008 | Alzheimer's Disease | C0002395 | MTHFR  | 4524 | P42898    | methylenetetrahyd      | 1.22E-09 | 0.354 | 0.828    | C0948008 |
| Ischemic stroke | C0948008 | Alzheimer's Disease | C0002395 | APOE   | 348  | P02649    | apolipoprotein E       | 0.001737 | 0.352 | 0.931    | C0948008 |
| Ischemic stroke | C0948008 | Alzheimer's Disease | C0002395 | CXCL8  | 3576 | P10145    | C-X-C mo signaling mol | 0.342    | 0.862 | C0948008 | C0948008 |
| Ischemic stroke | C0948008 | Alzheimer's Disease | C0002395 | MMP9   | 4318 | P14780    | matrix mhydrolase      | 7.03E-18 | 0.339 | 0.862    | C0948008 |
| Ischemic stroke | C0948008 | Alzheimer's Disease | C0002395 | PTGS2  | 5743 | P35354    | prostagl oxidoredu     | 0.99639  | 0.338 | 0.897    | C0948008 |
| Ischemic stroke | C0948008 | Alzheimer's Disease | C0002395 | TGFB1  | 7040 | P01137    | transform signaling    | 0.17182  | 0.336 | 0.931    | C0948008 |
| Ischemic stroke | C0948008 | Alzheimer's Disease | C0002395 | CDKN2A | 1029 | P42771;Q8 | cyclin dependent       | 0.38138  | 0.321 | 0.828    | C0948008 |
| Ischemic stroke | C0948008 | Alzheimer's Disease | C0002395 | IL10   | 3586 | P22301    | interleukin 10         | 0.006506 | 0.32  | 0.931    | C0948008 |
| Ischemic stroke | C0948008 | Alzheimer's Disease | C0002395 | IL1B   | 3553 | P01584    | interleukin 1 bet      | 0.12568  | 0.312 | 0.931    | C0948008 |
| Ischemic stroke | C0948008 | Alzheimer's Disease | C0002395 | VEGFA  | 7422 | P15692    | vascular signaling     | 2.65E-05 | 0.298 | 0.897    | C0948008 |
| Ischemic stroke | C0948008 | Alzheimer's Disease | C0002395 | IL6    | 3569 | P05231    | interleukin 6          | 0.33873  | 0.287 | 0.966    | C0948008 |
| Ischemic stroke | C0948008 | Alzheimer's Disease | C0002395 | TNF    | 7124 | P01375    | tumor nec signaling    | 0.8046   | 0.263 | 0.966    | C0948008 |
| Ischemic stroke | C0948008 | Alzheimer's Disease | C0002395 | TP53   | 7157 | P04637    | tumor pr transcrip     | 0.16862  | 0.251 | 0.897    | C0948008 |



|                                              |           |                               |            |         |         |           |                                            |              |  |       |       |           |
|----------------------------------------------|-----------|-------------------------------|------------|---------|---------|-----------|--------------------------------------------|--------------|--|-------|-------|-----------|
| Additional file5 Shared genes of ALS with IS |           |                               |            |         |         |           |                                            |              |  |       |       |           |
|                                              |           |                               |            |         |         |           |                                            |              |  |       |       |           |
| Index_disease                                | Index_dis | Associated_disease            | Associated | Gene    | Gene_id | UniProt   | Gene_Full                                  | Protein_CpLI |  | DSI_g | DPI_g | diseaseic |
| Ischemic stroke                              | C0948008  | Amyotrophic Lateral Sclerosis | C0002736   | GRM2    | 2912    | Q14416    | glutamate receptor                         | 0.1063       |  | 0.645 | 0.414 | C0948008  |
| Ischemic stroke                              | C0948008  | Amyotrophic Lateral Sclerosis | C0002736   | COL4A2  | 1284    | P08572    | collagen type IV                           | 1.04E-13     |  | 0.642 | 0.448 | C0948008  |
| Ischemic stroke                              | C0948008  | Amyotrophic Lateral Sclerosis | C0002736   | P2RY1   | 5028    | P47900    | purinergic recept                          | 0.54087      |  | 0.642 | 0.586 | C0948008  |
| Ischemic stroke                              | C0948008  | Amyotrophic Lateral Sclerosis | C0002736   | MASP2   | 10747   | O00187    | mannan b1hydrolase                         | 3.59E-14     |  | 0.642 | 0.655 | C0948008  |
| Ischemic stroke                              | C0948008  | Amyotrophic Lateral Sclerosis | C0002736   | GRIA2   | 2891    | P42262    | glutamate ionotro                          | 0.99906      |  | 0.639 | 0.414 | C0948008  |
| Ischemic stroke                              | C0948008  | Amyotrophic Lateral Sclerosis | C0002736   | PTGER2  | 5732    | P43116    | prostaglandin recepto                      | 0.041771     |  | 0.607 | 0.621 | C0948008  |
| Ischemic stroke                              | C0948008  | Amyotrophic Lateral Sclerosis | C0002736   | PON2    | 5445    | Q15165    | paraoxonase 2                              | 6.06E-05     |  | 0.596 | 0.621 | C0948008  |
| Ischemic stroke                              | C0948008  | Amyotrophic Lateral Sclerosis | C0002736   | TRPM7   | 54822   | Q96QT4    | transient receptor                         | 1.72E-15     |  | 0.584 | 0.552 | C0948008  |
| Ischemic stroke                              | C0948008  | Amyotrophic Lateral Sclerosis | C0002736   | TNFSF14 | 8740    | O43557    | TNF superfamily signaling                  | 0.046389     |  | 0.58  | 0.586 | C0948008  |
| Ischemic stroke                              | C0948008  | Amyotrophic Lateral Sclerosis | C0002736   | PINK1   | 65018   | Q9BXM7    | PTEN inducible kinase; 1                   | 1.03E-10     |  | 0.577 | 0.586 | C0948008  |
| Ischemic stroke                              | C0948008  | Amyotrophic Lateral Sclerosis | C0002736   | GPX3    | 2878    | P22352    | glutathione oxidoreductase                 | 0.042528     |  | 0.575 | 0.586 | C0948008  |
| Ischemic stroke                              | C0948008  | Amyotrophic Lateral Sclerosis | C0002736   | SLC1A2  | 6506    | P43004    | solute carrier transport                   | 0.61687      |  | 0.572 | 0.517 | C0948008  |
| Ischemic stroke                              | C0948008  | Amyotrophic Lateral Sclerosis | C0002736   | TREM2   | 54209   | Q9NZC2    | triggering receptor                        | 4.00E-09     |  | 0.572 | 0.552 | C0948008  |
| Ischemic stroke                              | C0948008  | Amyotrophic Lateral Sclerosis | C0002736   | PTGES   | 9536    | O14684    | prostaglandin synthase                     | 0.65991      |  | 0.562 | 0.69  | C0948008  |
| Ischemic stroke                              | C0948008  | Amyotrophic Lateral Sclerosis | C0002736   | SLC33A1 | 9197    | O00400    | solute carrier transport                   | 9.14E-05     |  | 0.551 | 0.655 | C0948008  |
| Ischemic stroke                              | C0948008  | Amyotrophic Lateral Sclerosis | C0002736   | TFPI2   | 7980    | P48307    | tissue inhibitor of metalloproteinase      | 0.00078      |  | 0.545 | 0.621 | C0948008  |
| Ischemic stroke                              | C0948008  | Amyotrophic Lateral Sclerosis | C0002736   | CDK5    | 1020    | Q00535    | cyclin dependent kinase; 5                 | 0.095196     |  | 0.542 | 0.69  | C0948008  |
| Ischemic stroke                              | C0948008  | Amyotrophic Lateral Sclerosis | C0002736   | SULT1E1 | 6783    | P49888    | sulfotransferase                           | 2.17E-07     |  | 0.538 | 0.759 | C0948008  |
| Ischemic stroke                              | C0948008  | Amyotrophic Lateral Sclerosis | C0002736   | PIN1    | 5300    | Q13526    | peptidylprolyl isomerase                   | 0.76129      |  | 0.536 | 0.655 | C0948008  |
| Ischemic stroke                              | C0948008  | Amyotrophic Lateral Sclerosis | C0002736   | SGK1    | 6446    | O00141    | serum/glucocorticoid-inducible kinase      | 0.040926     |  | 0.53  | 0.621 | C0948008  |
| Ischemic stroke                              | C0948008  | Amyotrophic Lateral Sclerosis | C0002736   | UCP2    | 7351    | P55851    | uncoupling protein                         | 1.35E-10     |  | 0.53  | 0.69  | C0948008  |
| Ischemic stroke                              | C0948008  | Amyotrophic Lateral Sclerosis | C0002736   | LIF     | 3976    | P15018    | LIF, interleukin-6 receptor                | 0.50007      |  | 0.528 | 0.655 | C0948008  |
| Ischemic stroke                              | C0948008  | Amyotrophic Lateral Sclerosis | C0002736   | MSC     | 9242    | O60682    | muscle specific protein                    | 0.022585     |  | 0.526 | 0.655 | C0948008  |
| Ischemic stroke                              | C0948008  | Amyotrophic Lateral Sclerosis | C0002736   | AQP4    | 361     | P55087    | aquaporin                                  | 0.002775     |  | 0.525 | 0.793 | C0948008  |
| Ischemic stroke                              | C0948008  | Amyotrophic Lateral Sclerosis | C0002736   | NTF3    | 4908    | P20783    | neurotrophin                               | 0.88635      |  | 0.525 | 0.621 | C0948008  |
| Ischemic stroke                              | C0948008  | Amyotrophic Lateral Sclerosis | C0002736   | NRG1    | 3084    | Q02297    | neuregulin                                 | 0.99553      |  | 0.506 | 0.759 | C0948008  |
| Ischemic stroke                              | C0948008  | Amyotrophic Lateral Sclerosis | C0002736   | P2RX7   | 5027    | Q99572    | purinergic receptor                        | 3.05E-11     |  | 0.503 | 0.759 | C0948008  |
| Ischemic stroke                              | C0948008  | Amyotrophic Lateral Sclerosis | C0002736   | ALOX5   | 240     | P09917    | arachidonate 5-lipoxygenase                | 1.50E-06     |  | 0.482 | 0.724 | C0948008  |
| Ischemic stroke                              | C0948008  | Amyotrophic Lateral Sclerosis | C0002736   | KCNA3   | 3738    | P22001    | potassium voltage-gated channel subunit A3 | 0.86034      |  | 0.481 | 0.724 | C0948008  |
| Ischemic stroke                              | C0948008  | Amyotrophic Lateral Sclerosis | C0002736   | ENG     | 2022    | P17813    | endoglin                                   | 0.99877      |  | 0.477 | 0.655 | C0948008  |
| Ischemic stroke                              | C0948008  | Amyotrophic Lateral Sclerosis | C0002736   | PRNP    | 5621    | F7VJQ1;P0 | prion protein                              | 0.000715     |  | 0.474 | 0.897 | C0948008  |
| Ischemic stroke                              | C0948008  | Amyotrophic Lateral Sclerosis | C0002736   | TIMP2   | 7077    | P16035    | TIMP metalloproteinase inhibitor 2         | 0.80818      |  | 0.467 | 0.759 | C0948008  |

|                 |          |                               |          |         |        |               |                                                  |          |       |       |          |
|-----------------|----------|-------------------------------|----------|---------|--------|---------------|--------------------------------------------------|----------|-------|-------|----------|
| Ischemic stroke | C0948008 | Amyotrophic Lateral Sclerosis | C0002736 | COX8A   | 1351   | P10176        | cytochrome oxidoreductase                        | 0.10544  | 0.461 | 0.793 | C0948008 |
| Ischemic stroke | C0948008 | Amyotrophic Lateral Sclerosis | C0002736 | MIR146A | 406938 |               | microRNA 146a                                    |          | 0.452 | 0.759 | C0948008 |
| Ischemic stroke | C0948008 | Amyotrophic Lateral Sclerosis | C0002736 | XRCC1   | 7515   | P18887        | X-ray repair cross-complementing factor          | 4.76E-09 | 0.449 | 0.828 | C0948008 |
| Ischemic stroke | C0948008 | Amyotrophic Lateral Sclerosis | C0002736 | CD40LG  | 959    | P29965        | CD40 ligand                                      | 0.72669  | 0.447 | 0.828 | C0948008 |
| Ischemic stroke | C0948008 | Amyotrophic Lateral Sclerosis | C0002736 | PON1    | 5444   | P27169        | paraoxonase 1                                    | 8.98E-11 | 0.443 | 0.828 | C0948008 |
| Ischemic stroke | C0948008 | Amyotrophic Lateral Sclerosis | C0002736 | HSPA4   | 3308   | P34932        | heat shock protein 70 kDa class B member 4       | 0.9999   | 0.441 | 0.793 | C0948008 |
| Ischemic stroke | C0948008 | Amyotrophic Lateral Sclerosis | C0002736 | HFE     | 3077   | Q30201        | homeostatic iron protein 1                       | 3.01E-08 | 0.44  | 0.69  | C0948008 |
| Ischemic stroke | C0948008 | Amyotrophic Lateral Sclerosis | C0002736 | IGF1R   | 3480   | P08069        | insulin like growth factor receptor type 1       | 0.98751  | 0.433 | 0.828 | C0948008 |
| Ischemic stroke | C0948008 | Amyotrophic Lateral Sclerosis | C0002736 | EPHB2   | 2048   | P29323        | EPH receptor B2                                  | 0.99999  | 0.425 | 0.759 | C0948008 |
| Ischemic stroke | C0948008 | Amyotrophic Lateral Sclerosis | C0002736 | EPO     | 2056   | P01588        | erythropoietin                                   | 0.012147 | 0.425 | 0.759 | C0948008 |
| Ischemic stroke | C0948008 | Amyotrophic Lateral Sclerosis | C0002736 | KDR     | 3791   | P35968        | kinase insert domain containing 4                | 0.99979  | 0.423 | 0.724 | C0948008 |
| Ischemic stroke | C0948008 | Amyotrophic Lateral Sclerosis | C0002736 | CSF3    | 1440   | P09919        | colony stimulating factor 3                      | 0.32663  | 0.421 | 0.828 | C0948008 |
| Ischemic stroke | C0948008 | Amyotrophic Lateral Sclerosis | C0002736 | NOTCH1  | 4851   | P46531        | notch 1                                          | 1        | 0.415 | 0.759 | C0948008 |
| Ischemic stroke | C0948008 | Amyotrophic Lateral Sclerosis | C0002736 | FGF2    | 2247   | P09038        | fibroblast growth factor 2                       | 0.019149 | 0.404 | 0.897 | C0948008 |
| Ischemic stroke | C0948008 | Amyotrophic Lateral Sclerosis | C0002736 | HMOX1   | 3162   | P09601        | heme oxygenase 1                                 | 0.007886 | 0.403 | 0.862 | C0948008 |
| Ischemic stroke | C0948008 | Amyotrophic Lateral Sclerosis | C0002736 | CRP     | 1401   | P02741        | C-reactive protein                               | 0.003736 | 0.399 | 0.862 | C0948008 |
| Ischemic stroke | C0948008 | Amyotrophic Lateral Sclerosis | C0002736 | COX2    | 4513   | P00403        | cytochrome oxidoreductase                        |          | 0.397 | 0.862 | C0948008 |
| Ischemic stroke | C0948008 | Amyotrophic Lateral Sclerosis | C0002736 | IL17A   | 3605   | Q16552        | interleukin 17A                                  | 0.044037 | 0.391 | 0.862 | C0948008 |
| Ischemic stroke | C0948008 | Amyotrophic Lateral Sclerosis | C0002736 | PPARG   | 5468   | P37231        | peroxisome proliferator-activated receptor gamma | 0.1447   | 0.388 | 0.828 | C0948008 |
| Ischemic stroke | C0948008 | Amyotrophic Lateral Sclerosis | C0002736 | MAPK1   | 5594   | P28482        | mitogen-activated protein kinase 1               | 0.9973   | 0.387 | 0.862 | C0948008 |
| Ischemic stroke | C0948008 | Amyotrophic Lateral Sclerosis | C0002736 | BDNF    | 627    | P23560        | brain derived neurotrophic factor                | 0.69969  | 0.382 | 0.828 | C0948008 |
| Ischemic stroke | C0948008 | Amyotrophic Lateral Sclerosis | C0002736 | AR      | 367    | P10275        | androgen receptor                                | 0.98299  | 0.38  | 0.793 | C0948008 |
| Ischemic stroke | C0948008 | Amyotrophic Lateral Sclerosis | C0002736 | IL4     | 3565   | P05112        | interleukin 4                                    | 0.005296 | 0.364 | 0.931 | C0948008 |
| Ischemic stroke | C0948008 | Amyotrophic Lateral Sclerosis | C0002736 | TLR4    | 7099   | O00206        | toll like receptor 4                             | 5.58E-09 | 0.359 | 0.931 | C0948008 |
| Ischemic stroke | C0948008 | Amyotrophic Lateral Sclerosis | C0002736 | IGF1    | 3479   | P05019        | insulin like growth factor 1                     | 0.28843  | 0.355 | 0.828 | C0948008 |
| Ischemic stroke | C0948008 | Amyotrophic Lateral Sclerosis | C0002736 | APOE    | 348    | P02649        | apolipoprotein E                                 | 0.001737 | 0.352 | 0.931 | C0948008 |
| Ischemic stroke | C0948008 | Amyotrophic Lateral Sclerosis | C0002736 | MMP9    | 4318   | P14780        | matrix metalloproteinase 9                       | 7.03E-18 | 0.339 | 0.862 | C0948008 |
| Ischemic stroke | C0948008 | Amyotrophic Lateral Sclerosis | C0002736 | PTGS2   | 5743   | P35354        | prostaglandin synthase                           | 0.99639  | 0.338 | 0.897 | C0948008 |
| Ischemic stroke | C0948008 | Amyotrophic Lateral Sclerosis | C0002736 | TGFB1   | 7040   | P01137        | transforming growth factor beta 1                | 0.17182  | 0.336 | 0.931 | C0948008 |
| Ischemic stroke | C0948008 | Amyotrophic Lateral Sclerosis | C0002736 | CDKN2A  | 1029   | P42771;Q96006 | cyclin dependent kinase 2                        | 0.38138  | 0.321 | 0.828 | C0948008 |
| Ischemic stroke | C0948008 | Amyotrophic Lateral Sclerosis | C0002736 | IL10    | 3586   | P22301        | interleukin 10                                   | 0.006506 | 0.32  | 0.931 | C0948008 |
| Ischemic stroke | C0948008 | Amyotrophic Lateral Sclerosis | C0002736 | IL1B    | 3553   | P01584        | interleukin 1 beta                               | 0.12568  | 0.312 | 0.931 | C0948008 |
| Ischemic stroke | C0948008 | Amyotrophic Lateral Sclerosis | C0002736 | VEGFA   | 7422   | P15692        | vascular endothelial growth factor A             | 2.65E-05 | 0.298 | 0.897 | C0948008 |
| Ischemic stroke | C0948008 | Amyotrophic Lateral Sclerosis | C0002736 | TNF     | 7124   | P01375        | tumor necrosis factor                            | 0.8046   | 0.263 | 0.966 | C0948008 |
| Ischemic stroke | C0948008 | Amyotrophic Lateral Sclerosis | C0002736 | TP53    | 7157   | P04637        | tumor protein p53                                | 0.16862  | 0.251 | 0.897 | C0948008 |

| Additional file5 Shared genes of dementia with IS |           |                    |            |          |         |          |                   |           |          |       |       |            |
|---------------------------------------------------|-----------|--------------------|------------|----------|---------|----------|-------------------|-----------|----------|-------|-------|------------|
| Index_dis                                         | Index_dis | Associated_disease | Associated | Gene     | Gene_id | UniProt  | Gene_Full         | Protein_C | pLI      | DSI_g | DPI_g | diseaseid1 |
| Ischemic                                          | C0948008  | Dementia           | C0497327   | NINJ2    | 4815    | Q9NZG7   | ninjurin          | cell adh  | 0.001235 | 0.834 | 0.103 | C0948008   |
| Ischemic                                          | C0948008  | Dementia           | C0497327   | F11      | 2160    | P03951   | coagulat          | hydrolas  | 5.09E-26 | 0.656 | 0.414 | C0948008   |
| Ischemic                                          | C0948008  | Dementia           | C0497327   | SERPINI1 | 5274    | Q99574   | serpin fa         | enzyme m  | 0.029902 | 0.642 | 0.31  | C0948008   |
| Ischemic                                          | C0948008  | Dementia           | C0497327   | PON2     | 5445    | Q15165   | paraoxonase 2     |           | 6.06E-05 | 0.596 | 0.621 | C0948008   |
| Ischemic                                          | C0948008  | Dementia           | C0497327   | PLA2G7   | 7941    | Q13093   | phosphol          | hydrolas  | 8.88E-22 | 0.584 | 0.552 | C0948008   |
| Ischemic                                          | C0948008  | Dementia           | C0497327   | TRPM7    | 54822   | Q96QT4   | transien          | receptor  | 1.72E-15 | 0.584 | 0.552 | C0948008   |
| Ischemic                                          | C0948008  | Dementia           | C0497327   | PINK1    | 65018   | Q9BXM7   | PTEN indu         | kinase; i | 1.03E-10 | 0.577 | 0.586 | C0948008   |
| Ischemic                                          | C0948008  | Dementia           | C0497327   | SERPINA3 | 12      | P01011   | serpin fa         | enzyme m  | 8.07E-14 | 0.572 | 0.69  | C0948008   |
| Ischemic                                          | C0948008  | Dementia           | C0497327   | TREM2    | 54209   | Q9NZC2   | triggering recept |           | 4.00E-09 | 0.572 | 0.552 | C0948008   |
| Ischemic                                          | C0948008  | Dementia           | C0497327   | CETP     | 1071    | P11597   | cholesteryl ester |           | 1.03E-23 | 0.555 | 0.655 | C0948008   |
| Ischemic                                          | C0948008  | Dementia           | C0497327   | MOK      | 5891    | Q9UQ07   | MOK prot          | kinase; i | 9.92E-22 | 0.554 | 0.655 | C0948008   |
| Ischemic                                          | C0948008  | Dementia           | C0497327   | ACE2     | 59272   | Q9BYF1   | angiotens         | hydrolas  | 0.99813  | 0.542 | 0.655 | C0948008   |
| Ischemic                                          | C0948008  | Dementia           | C0497327   | PPIG     | 9360    | Q13427   | peptidylprolyl is |           | 0.9649   | 0.537 | 0.793 | C0948008   |
| Ischemic                                          | C0948008  | Dementia           | C0497327   | PIN1     | 5300    | Q13526   | peptidylprolyl ci |           | 0.76129  | 0.536 | 0.655 | C0948008   |
| Ischemic                                          | C0948008  | Dementia           | C0497327   | LRP1     | 4035    | Q07954   | LDL receptor rela |           | 1        | 0.533 | 0.724 | C0948008   |
| Ischemic                                          | C0948008  | Dementia           | C0497327   | MSC      | 9242    | O60682   | musculin          |           | 0.022585 | 0.526 | 0.655 | C0948008   |
| Ischemic                                          | C0948008  | Dementia           | C0497327   | COL4A1   | 1282    | P02462   | collagen type IV  |           | 1        | 0.512 | 0.69  | C0948008   |
| Ischemic                                          | C0948008  | Dementia           | C0497327   | EEF1A2   | 1917    | Q05639   | eukaryot          | enzyme m  | 0.99606  | 0.51  | 0.69  | C0948008   |
| Ischemic                                          | C0948008  | Dementia           | C0497327   | GDF15    | 9518    | Q99988   | growth d          | signaling | 2.85E-07 | 0.496 | 0.621 | C0948008   |
| Ischemic                                          | C0948008  | Dementia           | C0497327   | PLA2G6   | 8398    | O60733   | phosphol          | enzyme m  | 2.79E-10 | 0.494 | 0.724 | C0948008   |
| Ischemic                                          | C0948008  | Dementia           | C0497327   | LPA      | 4018    | P08519   | lipoprote         | hydrolas  | 5.81E-88 | 0.489 | 0.655 | C0948008   |
| Ischemic                                          | C0948008  | Dementia           | C0497327   | ABCA1    | 19      | O95477   | ATP bind          | transport | 3.53E-12 | 0.484 | 0.793 | C0948008   |
| Ischemic                                          | C0948008  | Dementia           | C0497327   | KCNA3    | 3738    | P22001   | potassium voltage |           | 0.86034  | 0.481 | 0.724 | C0948008   |
| Ischemic                                          | C0948008  | Dementia           | C0497327   | SELE     | 6401    | P16581   | selectin E        |           | 7.02E-10 | 0.479 | 0.793 | C0948008   |
| Ischemic                                          | C0948008  | Dementia           | C0497327   | APOB     | 338     | P04114   | apolipoprotein B  |           | 1.64E-16 | 0.477 | 0.724 | C0948008   |
| Ischemic                                          | C0948008  | Dementia           | C0497327   | PRNP     | 5621    | F7VJQ1;P | prion protein     |           | 0.000715 | 0.474 | 0.897 | C0948008   |
| Ischemic                                          | C0948008  | Dementia           | C0497327   | AGER     | 177     | Q15109   | advanced          | cell adh  | 3.44E-16 | 0.472 | 0.724 | C0948008   |
| Ischemic                                          | C0948008  | Dementia           | C0497327   | ADM      | 133     | P35318   | adrenomed         | signaling | 0.034615 | 0.471 | 0.724 | C0948008   |
| Ischemic                                          | C0948008  | Dementia           | C0497327   | NOTCH3   | 4854    | Q9UM47   | notch 3           |           | 0.86965  | 0.469 | 0.69  | C0948008   |
| Ischemic                                          | C0948008  | Dementia           | C0497327   | VCAM1    | 7412    | P19320   | vascular cell adh |           | 0.74466  | 0.466 | 0.793 | C0948008   |
| Ischemic                                          | C0948008  | Dementia           | C0497327   | PPARA    | 5465    | Q07869   | peroxisom         | nucleic a | 0.037307 | 0.465 | 0.793 | C0948008   |

|          |          |          |          |          |        |        |                           |          |       |       |          |
|----------|----------|----------|----------|----------|--------|--------|---------------------------|----------|-------|-------|----------|
| Ischemic | C0948008 | Dementia | C0497327 | APOA1    | 335    | P02647 | apolipoprotein A1         | 0.000549 | 0.463 | 0.759 | C0948008 |
| Ischemic | C0948008 | Dementia | C0497327 | ESR2     | 2100   | Q92731 | estrogen nucleic a        | 5.39E-08 | 0.445 | 0.828 | C0948008 |
| Ischemic | C0948008 | Dementia | C0497327 | PON1     | 5444   | P27169 | paraoxonase 1             | 8.98E-11 | 0.443 | 0.828 | C0948008 |
| Ischemic | C0948008 | Dementia | C0497327 | HFE      | 3077   | Q30201 | homeostatic iron          | 3.01E-08 | 0.44  | 0.69  | C0948008 |
| Ischemic | C0948008 | Dementia | C0497327 | MMP3     | 4314   | P08254 | matrix mhydrolas          | 4.93E-15 | 0.439 | 0.793 | C0948008 |
| Ischemic | C0948008 | Dementia | C0497327 | IGF1R    | 3480   | P08069 | insulin like grow         | 0.98751  | 0.433 | 0.828 | C0948008 |
| Ischemic | C0948008 | Dementia | C0497327 | BRCA2    | 675    | P51587 | BRCA2, Dnucleic a         | 5.46E-24 | 0.426 | 0.793 | C0948008 |
| Ischemic | C0948008 | Dementia | C0497327 | COMT     | 1312   | P21964 | catecholtransfera         | 1.27E-05 | 0.426 | 0.897 | C0948008 |
| Ischemic | C0948008 | Dementia | C0497327 | REN      | 5972   | P00797 | renin hydrolas            | 2.12E-07 | 0.423 | 0.759 | C0948008 |
| Ischemic | C0948008 | Dementia | C0497327 | MIR21    | 406991 |        | microRNA 21               |          | 0.407 | 0.759 | C0948008 |
| Ischemic | C0948008 | Dementia | C0497327 | IL18     | 3606   | Q14116 | interleukin 18            | 0.029184 | 0.404 | 0.862 | C0948008 |
| Ischemic | C0948008 | Dementia | C0497327 | NOS3     | 4846   | P29474 | nitric oxide synt         | 8.89E-07 | 0.401 | 0.862 | C0948008 |
| Ischemic | C0948008 | Dementia | C0497327 | CRP      | 1401   | P02741 | C-reactive protei         | 0.003736 | 0.399 | 0.862 | C0948008 |
| Ischemic | C0948008 | Dementia | C0497327 | IL1RN    | 3557   | P18510 | interleukin 1 rec         | 0.033509 | 0.398 | 0.897 | C0948008 |
| Ischemic | C0948008 | Dementia | C0497327 | COX2     | 4513   | P00403 | cytochrome oxidoreductase |          | 0.397 | 0.862 | C0948008 |
| Ischemic | C0948008 | Dementia | C0497327 | SPP1     | 6696   | P10451 | secreted phosphop         | 1.05E-06 | 0.391 | 0.862 | C0948008 |
| Ischemic | C0948008 | Dementia | C0497327 | PPARG    | 5468   | P37231 | peroxisomnucleic a        | 0.1447   | 0.388 | 0.828 | C0948008 |
| Ischemic | C0948008 | Dementia | C0497327 | ICAM1    | 3383   | P05362 | intercellular adh         | 0.038102 | 0.386 | 0.897 | C0948008 |
| Ischemic | C0948008 | Dementia | C0497327 | SERPINE1 | 5054   | P05121 | serpin fenzyme m          | 0.047491 | 0.384 | 0.793 | C0948008 |
| Ischemic | C0948008 | Dementia | C0497327 | BDNF     | 627    | P23560 | brain designaling         | 0.69969  | 0.382 | 0.828 | C0948008 |
| Ischemic | C0948008 | Dementia | C0497327 | ACE      | 1636   | P12821 | angiotenshydrolas         | 1.55E-37 | 0.367 | 0.897 | C0948008 |
| Ischemic | C0948008 | Dementia | C0497327 | IL1A     | 3552   | P01583 | interleukin 1 alp         | 0.000149 | 0.366 | 0.931 | C0948008 |
| Ischemic | C0948008 | Dementia | C0497327 | ESR1     | 2099   | P03372 | estrogen nucleic a        | 0.9994   | 0.355 | 0.897 | C0948008 |
| Ischemic | C0948008 | Dementia | C0497327 | IGF1     | 3479   | P05019 | insulin like grow         | 0.28843  | 0.355 | 0.828 | C0948008 |
| Ischemic | C0948008 | Dementia | C0497327 | MTHFR    | 4524   | P42898 | methylenetetrahyd         | 1.22E-09 | 0.354 | 0.828 | C0948008 |
| Ischemic | C0948008 | Dementia | C0497327 | APOE     | 348    | P02649 | apolipoprotein E          | 0.001737 | 0.352 | 0.931 | C0948008 |
| Ischemic | C0948008 | Dementia | C0497327 | CXCL8    | 3576   | P10145 | C-X-C mo signaling molecu |          | 0.342 | 0.862 | C0948008 |
| Ischemic | C0948008 | Dementia | C0497327 | PTGS2    | 5743   | P35354 | prostagl oxidored         | 0.99639  | 0.338 | 0.897 | C0948008 |
| Ischemic | C0948008 | Dementia | C0497327 | TGFB1    | 7040   | P01137 | transform signaling       | 0.17182  | 0.336 | 0.931 | C0948008 |
| Ischemic | C0948008 | Dementia | C0497327 | IL1B     | 3553   | P01584 | interleukin 1 bet         | 0.12568  | 0.312 | 0.931 | C0948008 |
| Ischemic | C0948008 | Dementia | C0497327 | IL6      | 3569   | P05231 | interleukin 6             | 0.33873  | 0.287 | 0.966 | C0948008 |
| Ischemic | C0948008 | Dementia | C0497327 | TNF      | 7124   | P01375 | tumor nec signaling       | 0.8046   | 0.263 | 0.966 | C0948008 |
| Ischemic | C0948008 | Dementia | C0497327 | TP53     | 7157   | P04637 | tumor protranscri         | 0.16862  | 0.251 | 0.897 | C0948008 |

| Additional file5 Shared genes of epilepsy with IS |           |                    |           |           |         |         |                            |         |          |       |       |           |
|---------------------------------------------------|-----------|--------------------|-----------|-----------|---------|---------|----------------------------|---------|----------|-------|-------|-----------|
| Index_disease                                     | Index_dis | Associated_disease | Associate | Gene      | Gene_id | UniProt | Gene_Full                  | Protein | pLI      | DSI_g | DPI_g | diseaseic |
| Ischemic stroke                                   | C0948008  | Epilepsy           | C0014544  | KCNJ13    | 3769    | O60928  | potassium voltage          |         | 0.011166 | 0.681 | 0.172 | C0948008  |
| Ischemic stroke                                   | C0948008  | Epilepsy           | C0014544  | GAMT      | 2593    | Q14353  | guanidinoacetate           |         | 0.010013 | 0.667 | 0.241 | C0948008  |
| Ischemic stroke                                   | C0948008  | Epilepsy           | C0014544  | GRM2      | 2912    | Q14416  | glutamate receptor         |         | 0.1063   | 0.645 | 0.414 | C0948008  |
| Ischemic stroke                                   | C0948008  | Epilepsy           | C0014544  | COL4A2    | 1284    | P08572  | collagen type IV           |         | 1.04E-13 | 0.642 | 0.448 | C0948008  |
| Ischemic stroke                                   | C0948008  | Epilepsy           | C0014544  | SERPINI1  | 5274    | Q99574  | serpin f enzyme m          |         | 0.029902 | 0.642 | 0.31  | C0948008  |
| Ischemic stroke                                   | C0948008  | Epilepsy           | C0014544  | GRIA2     | 2891    | P42262  | glutamate ionotro          |         | 0.99906  | 0.639 | 0.414 | C0948008  |
| Ischemic stroke                                   | C0948008  | Epilepsy           | C0014544  | GRIN1     | 2902    | Q05586  | glutamate ionotro          |         | 0.98871  | 0.63  | 0.448 | C0948008  |
| Ischemic stroke                                   | C0948008  | Epilepsy           | C0014544  | GRIK2     | 2898    | Q13002  | glutamate ionotro          |         | 0.99979  | 0.621 | 0.586 | C0948008  |
| Ischemic stroke                                   | C0948008  | Epilepsy           | C0014544  | MUSK      | 4593    | O15146  | muscle associated          |         | 1.17E-07 | 0.609 | 0.621 | C0948008  |
| Ischemic stroke                                   | C0948008  | Epilepsy           | C0014544  | SRF       | 6722    | P11831  | serum retranscri           |         | 0.97512  | 0.598 | 0.69  | C0948008  |
| Ischemic stroke                                   | C0948008  | Epilepsy           | C0014544  | GLA       | 2717    | P06280  | galactosidase alp          |         | 0.99705  | 0.588 | 0.621 | C0948008  |
| Ischemic stroke                                   | C0948008  | Epilepsy           | C0014544  | AHSG      | 197     | P02765  | alpha 2-enzyme m           |         | 2.72E-10 | 0.577 | 0.69  | C0948008  |
| Ischemic stroke                                   | C0948008  | Epilepsy           | C0014544  | PINK1     | 65018   | Q9BXM7  | PTEN indu kinase;          |         | 1.03E-10 | 0.577 | 0.586 | C0948008  |
| Ischemic stroke                                   | C0948008  | Epilepsy           | C0014544  | SLC1A2    | 6506    | P43004  | solute catranspor          |         | 0.61687  | 0.572 | 0.517 | C0948008  |
| Ischemic stroke                                   | C0948008  | Epilepsy           | C0014544  | TREM2     | 54209   | Q9NZC2  | triggering recept          |         | 4.00E-09 | 0.572 | 0.552 | C0948008  |
| Ischemic stroke                                   | C0948008  | Epilepsy           | C0014544  | ACVRL1    | 94      | P37023  | activin kinase;            |         | 0.000823 | 0.57  | 0.621 | C0948008  |
| Ischemic stroke                                   | C0948008  | Epilepsy           | C0014544  | MIR132    | 406921  |         | microRNA 132               |         |          | 0.569 | 0.759 | C0948008  |
| Ischemic stroke                                   | C0948008  | Epilepsy           | C0014544  | PC        | 5091    | P11498  | pyruvate ligase            |         | 0.007175 | 0.565 | 0.724 | C0948008  |
| Ischemic stroke                                   | C0948008  | Epilepsy           | C0014544  | C20orf181 | 1E+08   |         | chromosome 20 open reading |         |          | 0.557 | 0.69  | C0948008  |
| Ischemic stroke                                   | C0948008  | Epilepsy           | C0014544  | ADRA2B    | 151     | P18089  | adrenoc receptor           |         | 2.20E-06 | 0.545 | 0.69  | C0948008  |
| Ischemic stroke                                   | C0948008  | Epilepsy           | C0014544  | NR4A3     | 8013    | Q92570  | nuclear receptor           |         | 0.89536  | 0.545 | 0.759 | C0948008  |
| Ischemic stroke                                   | C0948008  | Epilepsy           | C0014544  | CYP2C9    | 1559    | P11712  | cytochrome P450 f          |         | 1.80E-10 | 0.542 | 0.759 | C0948008  |
| Ischemic stroke                                   | C0948008  | Epilepsy           | C0014544  | ACTA2     | 59      | P62736  | actin, a cytoskel          |         | 0.9299   | 0.54  | 0.69  | C0948008  |
| Ischemic stroke                                   | C0948008  | Epilepsy           | C0014544  | PPIG      | 9360    | Q13427  | peptidylprolyl is          |         | 0.9649   | 0.537 | 0.793 | C0948008  |
| Ischemic stroke                                   | C0948008  | Epilepsy           | C0014544  | GCH1      | 2643    | P30793  | GTP cycl hydrolyse         |         | 0.91089  | 0.534 | 0.724 | C0948008  |
| Ischemic stroke                                   | C0948008  | Epilepsy           | C0014544  | FGF13     | 2258    | Q92913  | fibroblast signalin        |         | 0.90603  | 0.532 | 0.621 | C0948008  |
| Ischemic stroke                                   | C0948008  | Epilepsy           | C0014544  | SGK1      | 6446    | O00141  | serum/glycalcium-          |         | 0.040926 | 0.53  | 0.621 | C0948008  |
| Ischemic stroke                                   | C0948008  | Epilepsy           | C0014544  | UCP2      | 7351    | P55851  | uncoupling protei          |         | 1.35E-10 | 0.53  | 0.69  | C0948008  |
| Ischemic stroke                                   | C0948008  | Epilepsy           | C0014544  | AQP4      | 361     | P55087  | aquaporin transpor         |         | 0.002775 | 0.525 | 0.793 | C0948008  |
| Ischemic stroke                                   | C0948008  | Epilepsy           | C0014544  | KCNQ1     | 3784    | P51787  | potassium voltage          |         | 2.07E-07 | 0.525 | 0.586 | C0948008  |
| Ischemic stroke                                   | C0948008  | Epilepsy           | C0014544  | COL4A1    | 1282    | P02462  | collagen type IV           |         | 1        | 0.512 | 0.69  | C0948008  |

|                 |          |          |          |         |        |          |                   |           |          |       |       |          |
|-----------------|----------|----------|----------|---------|--------|----------|-------------------|-----------|----------|-------|-------|----------|
| Ischemic stroke | C0948008 | Epilepsy | C0014544 | EEF1A2  | 1917   | Q05639   | eukaryot          | enzyme m  | 0.99606  | 0.51  | 0.69  | C0948008 |
| Ischemic stroke | C0948008 | Epilepsy | C0014544 | MTRR    | 4552   | Q9UBK8   | 5-methyltetrahydr |           | 1.77E-14 | 0.51  | 0.655 | C0948008 |
| Ischemic stroke | C0948008 | Epilepsy | C0014544 | ABCC8   | 6833   | Q09428   | ATP bind          | transport | 2.72E-23 | 0.508 | 0.69  | C0948008 |
| Ischemic stroke | C0948008 | Epilepsy | C0014544 | NRG1    | 3084   | Q02297   | neuregul          | signalin  | 0.99553  | 0.506 | 0.759 | C0948008 |
| Ischemic stroke | C0948008 | Epilepsy | C0014544 | PLA2G1B | 5319   | P04054   | phosphol          | hydrolas  | 1.09E-10 | 0.502 | 0.793 | C0948008 |
| Ischemic stroke | C0948008 | Epilepsy | C0014544 | CYP2C19 | 1557   | P33261   | cytochrome P450 f |           | 4.11E-20 | 0.501 | 0.793 | C0948008 |
| Ischemic stroke | C0948008 | Epilepsy | C0014544 | HDAC9   | 9734   | Q9UKV0   | histone deacetyla |           | 0.99996  | 0.501 | 0.759 | C0948008 |
| Ischemic stroke | C0948008 | Epilepsy | C0014544 | PLA2G6  | 8398   | O60733   | phosphol          | enzyme m  | 2.79E-10 | 0.494 | 0.724 | C0948008 |
| Ischemic stroke | C0948008 | Epilepsy | C0014544 | MTR     | 4548   | Q99707   | 5-methyltetrahydr |           | 2.65E-10 | 0.493 | 0.724 | C0948008 |
| Ischemic stroke | C0948008 | Epilepsy | C0014544 | KCNA3   | 3738   | P22001   | potassium voltage |           | 0.86034  | 0.481 | 0.724 | C0948008 |
| Ischemic stroke | C0948008 | Epilepsy | C0014544 | ENG     | 2022   | P17813   | endoglin          |           | 0.99877  | 0.477 | 0.655 | C0948008 |
| Ischemic stroke | C0948008 | Epilepsy | C0014544 | PRNP    | 5621   | F7VJQ1;P | prion protein     |           | 0.000715 | 0.474 | 0.897 | C0948008 |
| Ischemic stroke | C0948008 | Epilepsy | C0014544 | AGER    | 177    | Q15109   | advanced          | cell adhe | 3.44E-16 | 0.472 | 0.724 | C0948008 |
| Ischemic stroke | C0948008 | Epilepsy | C0014544 | NPY     | 4852   | P01303   | neuropep          | signalin  | 0.15508  | 0.469 | 0.69  | C0948008 |
| Ischemic stroke | C0948008 | Epilepsy | C0014544 | NOTCH3  | 4854   | Q9UM47   | notch 3           |           | 0.86965  | 0.469 | 0.69  | C0948008 |
| Ischemic stroke | C0948008 | Epilepsy | C0014544 | SEMA6A  | 57556  | Q9H2E6   | semaphor          | signalin  | 0.99993  | 0.468 | 0.793 | C0948008 |
| Ischemic stroke | C0948008 | Epilepsy | C0014544 | COX8A   | 1351   | P10176   | cytochrom         | oxidore   | 0.10544  | 0.461 | 0.793 | C0948008 |
| Ischemic stroke | C0948008 | Epilepsy | C0014544 | EGR1    | 1958   | P18146   | early gro         | nucleic   | 0.3269   | 0.459 | 0.793 | C0948008 |
| Ischemic stroke | C0948008 | Epilepsy | C0014544 | PLAT    | 5327   | P00750   | plasmino          | hydrolas  | 3.46E-05 | 0.459 | 0.828 | C0948008 |
| Ischemic stroke | C0948008 | Epilepsy | C0014544 | MIR146A | 406938 |          | microRNA 146a     |           |          | 0.452 | 0.759 | C0948008 |
| Ischemic stroke | C0948008 | Epilepsy | C0014544 | ABCG2   | 9429   | Q9UNQ0   | ATP bind          | transport | 1.26E-32 | 0.449 | 0.793 | C0948008 |
| Ischemic stroke | C0948008 | Epilepsy | C0014544 | HSPA4   | 3308   | P34932   | heat shock protei |           | 0.9999   | 0.441 | 0.793 | C0948008 |
| Ischemic stroke | C0948008 | Epilepsy | C0014544 | CYP2B6  | 1555   | P20813   | cytochrome P450 f |           | 3.50E-10 | 0.437 | 0.828 | C0948008 |
| Ischemic stroke | C0948008 | Epilepsy | C0014544 | TBC1D9  | 23158  | Q6ZT07   | TBC1 dom          | enzyme m  | 2.83E-05 | 0.434 | 0.828 | C0948008 |
| Ischemic stroke | C0948008 | Epilepsy | C0014544 | HMGB1   | 3146   | P09429   | high mob          | nucleic   | 0.83018  | 0.433 | 0.828 | C0948008 |
| Ischemic stroke | C0948008 | Epilepsy | C0014544 | COMT    | 1312   | P21964   | catechol          | transfer  | 1.27E-05 | 0.426 | 0.897 | C0948008 |
| Ischemic stroke | C0948008 | Epilepsy | C0014544 | EPHB2   | 2048   | P29323   | EPH receptor B2   |           | 0.99999  | 0.425 | 0.759 | C0948008 |
| Ischemic stroke | C0948008 | Epilepsy | C0014544 | REN     | 5972   | P00797   | renin             | hydrolas  | 2.12E-07 | 0.423 | 0.759 | C0948008 |
| Ischemic stroke | C0948008 | Epilepsy | C0014544 | EZH2    | 2146   | Q15910   | enhancer of zeste |           | 1        | 0.421 | 0.759 | C0948008 |
| Ischemic stroke | C0948008 | Epilepsy | C0014544 | PLG     | 5340   | P00747   | plasmino          | hydrolas  | 0.009642 | 0.419 | 0.862 | C0948008 |
| Ischemic stroke | C0948008 | Epilepsy | C0014544 | MIR21   | 406991 |          | microRNA 21       |           |          | 0.407 | 0.759 | C0948008 |
| Ischemic stroke | C0948008 | Epilepsy | C0014544 | ATM     | 472    | Q13315   | ATM seri          | kinase;   | 5.98E-46 | 0.401 | 0.862 | C0948008 |
| Ischemic stroke | C0948008 | Epilepsy | C0014544 | IL1RN   | 3557   | P18510   | interleukin 1 rec |           | 0.033509 | 0.398 | 0.897 | C0948008 |
| Ischemic stroke | C0948008 | Epilepsy | C0014544 | IL17A   | 3605   | Q16552   | interleukin 17A   |           | 0.044037 | 0.391 | 0.862 | C0948008 |
| Ischemic stroke | C0948008 | Epilepsy | C0014544 | MAPK1   | 5594   | P28482   | mitogen-          | kinase;   | 0.9973   | 0.387 | 0.862 | C0948008 |
| Ischemic stroke | C0948008 | Epilepsy | C0014544 | BDNF    | 627    | P23560   | brain de          | signalin  | 0.69969  | 0.382 | 0.828 | C0948008 |

|                 |          |          |          |       |      |        |                   |           |          |       |       |          |
|-----------------|----------|----------|----------|-------|------|--------|-------------------|-----------|----------|-------|-------|----------|
| Ischemic stroke | C0948008 | Epilepsy | C0014544 | ABCB1 | 5243 | P08183 | ATP bind          | hydrolase | 1.31E-05 | 0.371 | 0.828 | C0948008 |
| Ischemic stroke | C0948008 | Epilepsy | C0014544 | IL1A  | 3552 | P01583 | interleukin 1 alp |           | 0.000149 | 0.366 | 0.931 | C0948008 |
| Ischemic stroke | C0948008 | Epilepsy | C0014544 | TLR4  | 7099 | 000206 | toll like recepto |           | 5.58E-09 | 0.359 | 0.931 | C0948008 |
| Ischemic stroke | C0948008 | Epilepsy | C0014544 | ESR1  | 2099 | P03372 | estrogen          | nucleic a | 0.9994   | 0.355 | 0.897 | C0948008 |
| Ischemic stroke | C0948008 | Epilepsy | C0014544 | MTHFR | 4524 | P42898 | methylenetetrahyd |           | 1.22E-09 | 0.354 | 0.828 | C0948008 |
| Ischemic stroke | C0948008 | Epilepsy | C0014544 | APOE  | 348  | P02649 | apolipoprotein E  |           | 0.001737 | 0.352 | 0.931 | C0948008 |
| Ischemic stroke | C0948008 | Epilepsy | C0014544 | TGFB1 | 7040 | P01137 | transform         | signaling | 0.17182  | 0.336 | 0.931 | C0948008 |
| Ischemic stroke | C0948008 | Epilepsy | C0014544 | IL1B  | 3553 | P01584 | interleukin 1 bet |           | 0.12568  | 0.312 | 0.931 | C0948008 |
| Ischemic stroke | C0948008 | Epilepsy | C0014544 | IL6   | 3569 | P05231 | interleukin 6     |           | 0.33873  | 0.287 | 0.966 | C0948008 |
| Ischemic stroke | C0948008 | Epilepsy | C0014544 | TP53  | 7157 | P04637 | tumor pro         | transcri  | 0.16862  | 0.251 | 0.897 | C0948008 |



| Additional file5 Shared genes of MDD with IS |          |                           |          |                 |         |          |                   |           |          |       |       |           |
|----------------------------------------------|----------|---------------------------|----------|-----------------|---------|----------|-------------------|-----------|----------|-------|-------|-----------|
|                                              |          |                           |          |                 |         |          |                   |           |          |       |       |           |
| Index_disease                                | Index_di | Associated_disease        | Associat | Gene            | Gene_id | UniProt  | Gene_Ful          | Protein_p | pLI      | DSI_g | DPI_g | diseaseic |
| Ischemic stroke                              | C0948008 | Major Depressive Disorder | C1269683 | KALRN           | 8997    | O60229   | kalirin           | signalin  | 1        | 0.72  | 0.207 | C0948008  |
| Ischemic stroke                              | C0948008 | Major Depressive Disorder | C1269683 | HOMER1          | 9456    | Q86YM7   | homer sca         | signalin  | 0.99937  | 0.69  | 0.241 | C0948008  |
| Ischemic stroke                              | C0948008 | Major Depressive Disorder | C1269683 | GRM2            | 2912    | Q14416   | glutamate         | receptor  | 0.1063   | 0.645 | 0.414 | C0948008  |
| Ischemic stroke                              | C0948008 | Major Depressive Disorder | C1269683 | GRIA2           | 2891    | P42262   | glutamate ionotro |           | 0.99906  | 0.639 | 0.414 | C0948008  |
| Ischemic stroke                              | C0948008 | Major Depressive Disorder | C1269683 | TNFSF12-TNFSF13 | 407977  | O43508   | TNFSF12-TNFSF13 r |           | 0.75747  | 0.639 | 0.517 | C0948008  |
| Ischemic stroke                              | C0948008 | Major Depressive Disorder | C1269683 | FADS1           | 3992    | O60427   | fatty acid desatu |           | 0.41321  | 0.636 | 0.621 | C0948008  |
| Ischemic stroke                              | C0948008 | Major Depressive Disorder | C1269683 | PDE11A          | 50940   | Q9HCR9   | phosphodiesterase |           | 1.57E-34 | 0.627 | 0.517 | C0948008  |
| Ischemic stroke                              | C0948008 | Major Depressive Disorder | C1269683 | REM1            | 28954   | O75628   | RRAD and GEM like |           | 6.77E-08 | 0.621 | 0.655 | C0948008  |
| Ischemic stroke                              | C0948008 | Major Depressive Disorder | C1269683 | CRTC1           | 23373   | Q6UUU9   | CREB reg          | transcri  | 0.42733  | 0.602 | 0.621 | C0948008  |
| Ischemic stroke                              | C0948008 | Major Depressive Disorder | C1269683 | TNFSF12         | 8742    | O43508   | TNF superfamily m |           | 0.75747  | 0.598 | 0.655 | C0948008  |
| Ischemic stroke                              | C0948008 | Major Depressive Disorder | C1269683 | REST            | 5978    | Q13127   | RE1 sile          | transcri  | 0.99393  | 0.584 | 0.517 | C0948008  |
| Ischemic stroke                              | C0948008 | Major Depressive Disorder | C1269683 | GPR42           | 2866    | O15529   | G protein-coupled |           | 0.047652 | 0.577 | 0.69  | C0948008  |
| Ischemic stroke                              | C0948008 | Major Depressive Disorder | C1269683 | PINK1           | 65018   | Q9BXM7   | PTEN ind          | kinase;   | 1.03E-10 | 0.577 | 0.586 | C0948008  |
| Ischemic stroke                              | C0948008 | Major Depressive Disorder | C1269683 | IL20            | 50604   | Q9NYY1   | interleukin 20    |           | 1.72E-06 | 0.575 | 0.69  | C0948008  |
| Ischemic stroke                              | C0948008 | Major Depressive Disorder | C1269683 | SLC1A2          | 6506    | P43004   | solute c          | transpor  | 0.61687  | 0.572 | 0.517 | C0948008  |
| Ischemic stroke                              | C0948008 | Major Depressive Disorder | C1269683 | BRS3            | 680     | P32247   | bombesin receptor |           | 0.90963  | 0.569 | 0.69  | C0948008  |
| Ischemic stroke                              | C0948008 | Major Depressive Disorder | C1269683 | SSTR4           | 6754    | P31391   | somatost          | receptor  | 2.77E-13 | 0.558 | 0.69  | C0948008  |
| Ischemic stroke                              | C0948008 | Major Depressive Disorder | C1269683 | ADRA1A          | 148     | P35348   | adrenoce          | receptor  | 2.60E-07 | 0.548 | 0.69  | C0948008  |
| Ischemic stroke                              | C0948008 | Major Depressive Disorder | C1269683 | ITGA2B          | 3674    | P08514   | integrin subunit  |           | 1.35E-15 | 0.548 | 0.517 | C0948008  |
| Ischemic stroke                              | C0948008 | Major Depressive Disorder | C1269683 | ADRA2B          | 151     | P18089   | adrenoce          | receptor  | 2.20E-06 | 0.545 | 0.69  | C0948008  |
| Ischemic stroke                              | C0948008 | Major Depressive Disorder | C1269683 | CDK5            | 1020    | Q00535   | cyclin d          | kinase;   | 0.095196 | 0.542 | 0.69  | C0948008  |
| Ischemic stroke                              | C0948008 | Major Depressive Disorder | C1269683 | CYP2C9          | 1559    | P11712   | cytochrome P450 f |           | 1.80E-10 | 0.542 | 0.759 | C0948008  |
| Ischemic stroke                              | C0948008 | Major Depressive Disorder | C1269683 | TLR7            | 51284   | Q9NYK1   | toll like recepto |           | 0.97165  | 0.542 | 0.759 | C0948008  |
| Ischemic stroke                              | C0948008 | Major Depressive Disorder | C1269683 | LPAR2           | 9170    | Q9HBW0   | lysophos          | receptor  | 0.04354  | 0.537 | 0.69  | C0948008  |
| Ischemic stroke                              | C0948008 | Major Depressive Disorder | C1269683 | GCH1            | 2643    | P30793   | GTP cycl          | hydrolas  | 0.91089  | 0.534 | 0.724 | C0948008  |
| Ischemic stroke                              | C0948008 | Major Depressive Disorder | C1269683 | GNB3            | 2784    | P16520   | G protei          | enzyme m  | 2.92E-11 | 0.533 | 0.724 | C0948008  |
| Ischemic stroke                              | C0948008 | Major Depressive Disorder | C1269683 | LRP1            | 4035    | Q07954   | LDL receptor rela |           | 1        | 0.533 | 0.724 | C0948008  |
| Ischemic stroke                              | C0948008 | Major Depressive Disorder | C1269683 | FGF13           | 2258    | Q92913   | fibroblas         | signalin  | 0.90603  | 0.532 | 0.621 | C0948008  |
| Ischemic stroke                              | C0948008 | Major Depressive Disorder | C1269683 | SGK1            | 6446    | O00141   | serum/gl          | calcium-  | 0.040926 | 0.53  | 0.621 | C0948008  |
| Ischemic stroke                              | C0948008 | Major Depressive Disorder | C1269683 | NTF3            | 4908    | P20783   | neurotro          | signalin  | 0.88635  | 0.525 | 0.621 | C0948008  |
| Ischemic stroke                              | C0948008 | Major Depressive Disorder | C1269683 | CXCR6           | 10663   | O00574   | C-X-C motif chemo |           | 5.33E-05 | 0.525 | 0.793 | C0948008  |
| Ischemic stroke                              | C0948008 | Major Depressive Disorder | C1269683 | NR3C2           | 4306    | P08235   | nuclear           | nucleic   | 0.80843  | 0.52  | 0.69  | C0948008  |
| Ischemic stroke                              | C0948008 | Major Depressive Disorder | C1269683 | HSPA1A          | 3303    | PODMV8;P | heat shock protei |           | 0.029335 | 0.516 | 0.793 | C0948008  |
| Ischemic stroke                              | C0948008 | Major Depressive Disorder | C1269683 | HSPA1B          | 3304    | PODMV8;P | heat shock protei |           | 0.005091 | 0.514 | 0.793 | C0948008  |



|                 |          |                           |          |          |       |          |                   |           |          |       |       |          |
|-----------------|----------|---------------------------|----------|----------|-------|----------|-------------------|-----------|----------|-------|-------|----------|
| Ischemic stroke | C0948008 | Major Depressive Disorder | C1269683 | NRG1     | 3084  | Q02297   | neuregul          | signalin  | 0.99553  | 0.506 | 0.759 | C0948008 |
| Ischemic stroke | C0948008 | Major Depressive Disorder | C1269683 | P2RX7    | 5027  | Q99572   | purinerg          | receptor  | 3.05E-11 | 0.503 | 0.759 | C0948008 |
| Ischemic stroke | C0948008 | Major Depressive Disorder | C1269683 | CYP2C19  | 1557  | P33261   | cytochrome P450 f |           | 4.11E-20 | 0.501 | 0.793 | C0948008 |
| Ischemic stroke | C0948008 | Major Depressive Disorder | C1269683 | ACKR3    | 57007 | P25106   | atypical chemokin |           | 0.37575  | 0.494 | 0.759 | C0948008 |
| Ischemic stroke | C0948008 | Major Depressive Disorder | C1269683 | AVP      | 551   | P01185   | arginine          | signalin  | 0.075195 | 0.486 | 0.759 | C0948008 |
| Ischemic stroke | C0948008 | Major Depressive Disorder | C1269683 | F2R      | 2149  | P25116   | coagulation facto |           | 0.00577  | 0.478 | 0.759 | C0948008 |
| Ischemic stroke | C0948008 | Major Depressive Disorder | C1269683 | EDNRA    | 1909  | P25101   | endothelin recept |           | 0.99154  | 0.469 | 0.828 | C0948008 |
| Ischemic stroke | C0948008 | Major Depressive Disorder | C1269683 | NPY      | 4852  | P01303   | neuropep          | signalin  | 0.15508  | 0.469 | 0.69  | C0948008 |
| Ischemic stroke | C0948008 | Major Depressive Disorder | C1269683 | NQO1     | 1728  | P15559   | NAD(P)H quinone d |           | 1.02E-09 | 0.467 | 0.724 | C0948008 |
| Ischemic stroke | C0948008 | Major Depressive Disorder | C1269683 | LTA      | 4049  | P01374   | lymphoto          | signalin  | 0.55529  | 0.463 | 0.862 | C0948008 |
| Ischemic stroke | C0948008 | Major Depressive Disorder | C1269683 | EGR1     | 1958  | P18146   | early gro         | nucleic a | 0.3269   | 0.459 | 0.793 | C0948008 |
| Ischemic stroke | C0948008 | Major Depressive Disorder | C1269683 | ESR2     | 2100  | Q92731   | estrogen          | nucleic a | 5.39E-08 | 0.445 | 0.828 | C0948008 |
| Ischemic stroke | C0948008 | Major Depressive Disorder | C1269683 | PON1     | 5444  | P27169   | paraoxonase 1     |           | 8.98E-11 | 0.443 | 0.828 | C0948008 |
| Ischemic stroke | C0948008 | Major Depressive Disorder | C1269683 | HSPA4    | 3308  | P34932   | heat shock protei |           | 0.9999   | 0.441 | 0.793 | C0948008 |
| Ischemic stroke | C0948008 | Major Depressive Disorder | C1269683 | MPO      | 4353  | P05164   | myeloper          | oxidored  | 6.82E-15 | 0.435 | 0.931 | C0948008 |
| Ischemic stroke | C0948008 | Major Depressive Disorder | C1269683 | TBC1D9   | 23158 | Q6ZT07   | TBC1 dom          | enzyme m  | 2.83E-05 | 0.434 | 0.828 | C0948008 |
| Ischemic stroke | C0948008 | Major Depressive Disorder | C1269683 | COMT     | 1312  | P21964   | catechol          | transfer  | 1.27E-05 | 0.426 | 0.897 | C0948008 |
| Ischemic stroke | C0948008 | Major Depressive Disorder | C1269683 | EPHB2    | 2048  | P29323   | EPH receptor B2   |           | 0.99999  | 0.425 | 0.759 | C0948008 |
| Ischemic stroke | C0948008 | Major Depressive Disorder | C1269683 | KDR      | 3791  | P35968   | kinase insert dom |           | 0.99979  | 0.423 | 0.724 | C0948008 |
| Ischemic stroke | C0948008 | Major Depressive Disorder | C1269683 | REN      | 5972  | P00797   | renin             | hydrolas  | 2.12E-07 | 0.423 | 0.759 | C0948008 |
| Ischemic stroke | C0948008 | Major Depressive Disorder | C1269683 | PLG      | 5340  | P00747   | plasmino          | hydrolas  | 0.009642 | 0.419 | 0.862 | C0948008 |
| Ischemic stroke | C0948008 | Major Depressive Disorder | C1269683 | NOTCH1   | 4851  | P46531   | notch 1           |           | 1        | 0.415 | 0.759 | C0948008 |
| Ischemic stroke | C0948008 | Major Depressive Disorder | C1269683 | FGF2     | 2247  | P09038   | fibroblas         | signalin  | 0.019149 | 0.404 | 0.897 | C0948008 |
| Ischemic stroke | C0948008 | Major Depressive Disorder | C1269683 | NOS3     | 4846  | P29474   | nitric oxide synt |           | 8.89E-07 | 0.401 | 0.862 | C0948008 |
| Ischemic stroke | C0948008 | Major Depressive Disorder | C1269683 | CRP      | 1401  | P02741   | C-reactive protei |           | 0.003736 | 0.399 | 0.862 | C0948008 |
| Ischemic stroke | C0948008 | Major Depressive Disorder | C1269683 | MAPK1    | 5594  | P28482   | mitogen           | kinase;   | 0.9973   | 0.387 | 0.862 | C0948008 |
| Ischemic stroke | C0948008 | Major Depressive Disorder | C1269683 | SERPINE1 | 5054  | P05121   | serpin f          | enzyme m  | 0.047491 | 0.384 | 0.793 | C0948008 |
| Ischemic stroke | C0948008 | Major Depressive Disorder | C1269683 | BDNF     | 627   | P23560   | brain de          | signalin  | 0.69969  | 0.382 | 0.828 | C0948008 |
| Ischemic stroke | C0948008 | Major Depressive Disorder | C1269683 | ABCB1    | 5243  | P08183   | ATP bind          | hydrolas  | 1.31E-05 | 0.371 | 0.828 | C0948008 |
| Ischemic stroke | C0948008 | Major Depressive Disorder | C1269683 | ACE      | 1636  | P12821   | angioten          | hydrolas  | 1.55E-37 | 0.367 | 0.897 | C0948008 |
| Ischemic stroke | C0948008 | Major Depressive Disorder | C1269683 | IL1A     | 3552  | P01583   | interleukin 1 alp |           | 0.000149 | 0.366 | 0.931 | C0948008 |
| Ischemic stroke | C0948008 | Major Depressive Disorder | C1269683 | ESR1     | 2099  | P03372   | estrogen          | nucleic a | 0.9994   | 0.355 | 0.897 | C0948008 |
| Ischemic stroke | C0948008 | Major Depressive Disorder | C1269683 | MTHFR    | 4524  | P42898   | methylenetetrahyd |           | 1.22E-09 | 0.354 | 0.828 | C0948008 |
| Ischemic stroke | C0948008 | Major Depressive Disorder | C1269683 | APOE     | 348   | P02649   | apolipoprotein E  |           | 0.001737 | 0.352 | 0.931 | C0948008 |
| Ischemic stroke | C0948008 | Major Depressive Disorder | C1269683 | PTGS2    | 5743  | P35354   | prostagl          | oxidored  | 0.99639  | 0.338 | 0.897 | C0948008 |
| Ischemic stroke | C0948008 | Major Depressive Disorder | C1269683 | CDKN2A   | 1029  | P42771;Q | cyclin dependent  |           | 0.38138  | 0.321 | 0.828 | C0948008 |
| Ischemic stroke | C0948008 | Major Depressive Disorder | C1269683 | IL10     | 3586  | P22301   | interleukin 10    |           | 0.006506 | 0.32  | 0.931 | C0948008 |
| Ischemic stroke | C0948008 | Major Depressive Disorder | C1269683 | IL1B     | 3553  | P01584   | interleukin 1 bet |           | 0.12568  | 0.312 | 0.931 | C0948008 |

|                 |          |                           |          |       |      |        |               |          |          |       |       |          |
|-----------------|----------|---------------------------|----------|-------|------|--------|---------------|----------|----------|-------|-------|----------|
| Ischemic stroke | C0948008 | Major Depressive Disorder | C1269683 | VEGFA | 7422 | P15692 | vascular      | signalin | 2.65E-05 | 0.298 | 0.897 | C0948008 |
| Ischemic stroke | C0948008 | Major Depressive Disorder | C1269683 | IL6   | 3569 | P05231 | interleukin 6 |          | 0.33873  | 0.287 | 0.966 | C0948008 |
| Ischemic stroke | C0948008 | Major Depressive Disorder | C1269683 | TNF   | 7124 | P01375 | tumor ne      | signalin | 0.8046   | 0.263 | 0.966 | C0948008 |

Additional file6 Six conformations of GRIN1 in molecular docking with NBP

| receptor            | conformation | Chain | binding area                      | affinity(kcal/mol) |
|---------------------|--------------|-------|-----------------------------------|--------------------|
| GRIN1heterotetramer | 11           | C     | ABD                               | -6.7               |
| GRIN1heterotetramer | 12           | AB    | interface of chain A and B in ABD | -6.7               |
| GRIN1heterotetramer | 14           | A     | ABD                               | -6.6               |
| GRIN1heterotetramer | 15           | AD    | interface of chain A and D in ABD | -6.6               |
| GRIN1heterotetramer | 17           | AB    | interface of chain A and B in ABD | -6.5               |
| GRIN1heterotetramer | 18           | BC    | interface of chain B and C in ABD | -6.4               |

*GRIN1:chain A and C;GRIN2A:chain B and D; ABD:agonist binding domain*
